# Supplementary material
Source: publisher figshare collection journal article supplement (https://acs.figshare.com/ndownloader/files/5692776)
Supplement: Supplementary file 1 [file 5692776]

# ic011124v.cif
 
data_p-1
 
_audit_creation_method            SHELXL-97
_chemical_name_systematic
;
  ?
;
_chemical_name_common             ?
_chemical_melting_point           ?
_chemical_formula_moiety          ?
_chemical_formula_sum
  'C11 H12 Cu Mo N2 O9 P2'
_chemical_formula_weight          537.65
 
loop_
  _atom_type_symbol
  _atom_type_description
  _atom_type_scat_dispersion_real
  _atom_type_scat_dispersion_imag
  _atom_type_scat_source
  'C'  'C'   0.0033   0.0016
  'International Tables Vol C Tables 4.2.6.8 and 6.1.1.4'
  'H'  'H'   0.0000   0.0000
  'International Tables Vol C Tables 4.2.6.8 and 6.1.1.4'
  'N'  'N'   0.0061   0.0033
  'International Tables Vol C Tables 4.2.6.8 and 6.1.1.4'
  'O'  'O'   0.0106   0.0060
  'International Tables Vol C Tables 4.2.6.8 and 6.1.1.4'
  'P'  'P'   0.1023   0.0942
  'International Tables Vol C Tables 4.2.6.8 and 6.1.1.4'
  'Cu'  'Cu'   0.3201   1.2651
  'International Tables Vol C Tables 4.2.6.8 and 6.1.1.4'
  'Mo'  'Mo'  -1.6832   0.6857
  'International Tables Vol C Tables 4.2.6.8 and 6.1.1.4'
 
_symmetry_cell_setting            Triclinic
_symmetry_space_group_name_H-M    P-1
 
loop_
  _symmetry_equiv_pos_as_xyz
  'x, y, z'
  '-x, -y, -z'
 
_cell_length_a                    8.0801(4)
_cell_length_b                    8.6606(5)
_cell_length_c                    11.8803(6)
_cell_angle_alpha                 82.1680(10)
_cell_angle_beta                  77.8470(10)
_cell_angle_gamma                 75.8550(10)
_cell_volume                      784.93(7)
_cell_formula_units_Z             2
_cell_measurement_temperature     293(2)
_cell_measurement_reflns_used     ?
_cell_measurement_theta_min       ?
_cell_measurement_theta_max       ?
 
_exptl_crystal_description        Plates
_exptl_crystal_colour             Light blue
_exptl_crystal_size_max           0.20
_exptl_crystal_size_mid           0.17
_exptl_crystal_size_min           0.16
_exptl_crystal_density_meas       ?
_exptl_crystal_density_diffrn     2.275
_exptl_crystal_density_method     'not measured'
_exptl_crystal_F_000              530
_exptl_absorpt_coefficient_mu     2.412
_exptl_absorpt_correction_type    SADABS
_exptl_absorpt_correction_T_min   ?
_exptl_absorpt_correction_T_max   ?
_exptl_absorpt_process_details    ?
 
_exptl_special_details
;
  ?
;
 
_diffrn_ambient_temperature       293(2)
_diffrn_radiation_wavelength      0.71073
_diffrn_radiation_type            MoK\a
_diffrn_radiation_source          'fine-focus sealed tube'
_diffrn_radiation_monochromator   graphite
_diffrn_measurement_device_type   ?
_diffrn_measurement_method        ?
_diffrn_detector_area_resol_mean  ?
_diffrn_standards_number          ?
_diffrn_standards_interval_count  ?
_diffrn_standards_interval_time   ?
_diffrn_standards_decay_%         ?
_diffrn_reflns_number             5360
_diffrn_reflns_av_R_equivalents   0.0233
_diffrn_reflns_av_sigmaI/netI     0.0432
_diffrn_reflns_limit_h_min        -10
_diffrn_reflns_limit_h_max        6
_diffrn_reflns_limit_k_min        -11
_diffrn_reflns_limit_k_max        11
_diffrn_reflns_limit_l_min        -15
_diffrn_reflns_limit_l_max        11
_diffrn_reflns_theta_min          1.76
_diffrn_reflns_theta_max          28.29
_reflns_number_total              3650
_reflns_number_gt                 3095
_reflns_threshold_expression      >2sigma(I)
 
_computing_data_collection        ?
_computing_cell_refinement        ?
_computing_data_reduction         ?
_computing_structure_solution     'SHELXS-97 (Sheldrick, 1990)'
_computing_structure_refinement   'SHELXL-97 (Sheldrick, 1997)'
_computing_molecular_graphics     ?
_computing_publication_material   ?
 
_refine_special_details
;
  Refinement of F^2^ against ALL reflections.  The weighted R-factor wR and
  goodness of fit S are based on F^2^, conventional R-factors R are based
  on F, with F set to zero for negative F^2^. The threshold expression of
  F^2^ > 2sigma(F^2^) is used only for calculating R-factors(gt) etc. and is
  not relevant to the choice of reflections for refinement.  R-factors based
  on F^2^ are statistically about twice as large as those based on F, and R-
  factors based on ALL data will be even larger.
;
 
_refine_ls_structure_factor_coef  Fsqd
_refine_ls_matrix_type            full
_refine_ls_weighting_scheme       calc
_refine_ls_weighting_details
  'calc w=1/[\s^2^(Fo^2^)+(0.0521P)^2^+0.0290P] where P=(Fo^2^+2Fc^2^)/3'
_atom_sites_solution_primary      direct
_atom_sites_solution_secondary    difmap
_atom_sites_solution_hydrogens    geom
_refine_ls_hydrogen_treatment     mixed
_refine_ls_extinction_method      none
_refine_ls_extinction_coef        ?
_refine_ls_number_reflns          3650
_refine_ls_number_parameters      243
_refine_ls_number_restraints      0
_refine_ls_R_factor_all           0.0442
_refine_ls_R_factor_gt            0.0344
_refine_ls_wR_factor_ref          0.0870
_refine_ls_wR_factor_gt           0.0832
_refine_ls_goodness_of_fit_ref    1.031
_refine_ls_restrained_S_all       1.031
_refine_ls_shift/su_max           0.001
_refine_ls_shift/su_mean          0.000
 
loop_
  _atom_site_label
  _atom_site_type_symbol
  _atom_site_fract_x
  _atom_site_fract_y
  _atom_site_fract_z
  _atom_site_U_iso_or_equiv
  _atom_site_adp_type
  _atom_site_occupancy
  _atom_site_symmetry_multiplicity
  _atom_site_calc_flag
  _atom_site_refinement_flags
  _atom_site_disorder_assembly
  _atom_site_disorder_group
Mo1 Mo 0.32702(4) 0.26488(3) 0.86423(2) 0.00574(9) Uani 1 1 d . . .
Cu1 Cu 0.76350(6) 0.09197(5) 0.70193(3) 0.00708(11) Uani 1 1 d . . .
P1 P -0.08214(12) 0.31768(11) 0.82870(7) 0.00628(18) Uani 1 1 d . . .
P2 P -0.31367(12) 0.09751(10) 0.96696(7) 0.00631(18) Uani 1 1 d . . .
O1 O 0.7480(3) 0.0004(3) 0.8605(2) 0.0087(5) Uani 1 1 d . . .
O2 O 0.4728(3) 0.2157(3) 0.7396(2) 0.0095(5) Uani 1 1 d . . .
O3 O 0.3217(3) 0.0149(3) 0.9234(2) 0.0087(5) Uani 1 1 d . . .
O4 O 0.5124(3) 0.2186(3) 0.9620(2) 0.0088(5) Uani 1 1 d . . .
O5 O 0.2953(3) 0.4665(3) 0.8561(2) 0.0117(5) Uani 1 1 d . . .
O6 O 0.1210(3) 0.2518(3) 0.8060(2) 0.0088(5) Uani 1 1 d . . .
O7 O 0.1548(3) 0.2893(3) 1.0339(2) 0.0089(5) Uani 1 1 d . . .
O8 O -0.1488(3) 0.2665(3) 0.7316(2) 0.0095(5) Uani 1 1 d . . .
O9 O -0.1287(3) 0.4941(3) 0.8356(2) 0.0105(5) Uani 1 1 d . . .
N1 N 0.6959(4) -0.0916(3) 0.6506(2) 0.0084(6) Uani 1 1 d . . .
N2 N 0.8086(4) 0.1500(4) 0.5316(2) 0.0087(6) Uani 1 1 d . . .
C1 C 0.6348(5) -0.2075(4) 0.7190(3) 0.0112(7) Uani 1 1 d . . .
H1 H 0.6177 -0.2050 0.7987 0.013 Uiso 1 1 calc R . .
C2 C 0.5955(5) -0.3330(4) 0.6750(3) 0.0135(8) Uani 1 1 d . . .
H2 H 0.5530 -0.4130 0.7244 0.016 Uiso 1 1 calc R . .
C3 C 0.6208(5) -0.3360(4) 0.5574(3) 0.0144(8) Uani 1 1 d . . .
H3 H 0.5967 -0.4193 0.5264 0.017 Uiso 1 1 calc R . .
C4 C 0.6827(5) -0.2137(4) 0.4841(3) 0.0136(8) Uani 1 1 d . . .
H4 H 0.6999 -0.2137 0.4042 0.016 Uiso 1 1 calc R . .
C5 C 0.7179(5) -0.0923(4) 0.5342(3) 0.0098(7) Uani 1 1 d . . .
C6 C 0.7804(5) 0.0463(4) 0.4668(3) 0.0095(7) Uani 1 1 d . . .
C7 C 0.8065(5) 0.0721(5) 0.3468(3) 0.0140(8) Uani 1 1 d . . .
H7 H 0.7875 -0.0006 0.3027 0.017 Uiso 1 1 calc R . .
C8 C 0.8617(5) 0.2094(5) 0.2945(3) 0.0152(8) Uani 1 1 d . . .
H8 H 0.8801 0.2296 0.2145 0.018 Uiso 1 1 calc R . .
C9 C 0.8891(5) 0.3157(5) 0.3618(3) 0.0157(8) Uani 1 1 d . . .
H9 H 0.9238 0.4088 0.3279 0.019 Uiso 1 1 calc R . .
C10 C 0.8639(5) 0.2808(4) 0.4807(3) 0.0122(7) Uani 1 1 d . . .
H10 H 0.8858 0.3499 0.5263 0.015 Uiso 1 1 calc R . .
C11 C -0.1600(5) 0.2152(4) 0.9672(3) 0.0087(7) Uani 1 1 d . . .
H11A H -0.0605 0.1461 0.9953 0.010 Uiso 1 1 calc R . .
H11B H -0.2125 0.2949 1.0218 0.010 Uiso 1 1 calc R . .
H7A H 0.172(7) 0.196(6) 1.085(4) 0.032(14) Uiso 1 1 d . . .
H7B H 0.161(6) 0.357(6) 1.073(4) 0.027(14) Uiso 1 1 d . . .
 
loop_
  _atom_site_aniso_label
  _atom_site_aniso_U_11
  _atom_site_aniso_U_22
  _atom_site_aniso_U_33
  _atom_site_aniso_U_23
  _atom_site_aniso_U_13
  _atom_site_aniso_U_12
Mo1 0.00527(16) 0.00671(15) 0.00528(15) 0.00029(10) -0.00098(11) -0.00181(11)
Cu1 0.0088(2) 0.0077(2) 0.0053(2) -0.00058(16) -0.00103(17) -0.00338(17)
P1 0.0059(4) 0.0071(4) 0.0062(4) 0.0001(3) -0.0016(3) -0.0021(3)
P2 0.0069(4) 0.0069(4) 0.0058(4) -0.0004(3) -0.0014(3) -0.0027(3)
O1 0.0112(13) 0.0078(12) 0.0066(11) -0.0010(9) 0.0000(10) -0.0024(10)
O2 0.0085(13) 0.0121(12) 0.0080(12) 0.0004(10) -0.0017(10) -0.0031(10)
O3 0.0120(13) 0.0084(12) 0.0055(11) 0.0009(9) -0.0003(10) -0.0036(10)
O4 0.0074(12) 0.0107(12) 0.0089(12) -0.0019(10) -0.0035(10) -0.0011(10)
O5 0.0128(14) 0.0091(12) 0.0133(12) 0.0001(10) -0.0040(11) -0.0016(11)
O6 0.0066(12) 0.0129(12) 0.0085(12) -0.0019(10) -0.0020(10) -0.0042(10)
O7 0.0088(13) 0.0103(13) 0.0072(12) -0.0018(10) 0.0007(10) -0.0026(10)
O8 0.0120(13) 0.0114(12) 0.0081(12) 0.0000(10) -0.0056(10) -0.0058(10)
O9 0.0141(14) 0.0065(12) 0.0102(12) -0.0012(10) -0.0017(10) -0.0014(10)
N1 0.0086(15) 0.0089(14) 0.0085(14) -0.0023(11) -0.0025(12) -0.0018(12)
N2 0.0064(14) 0.0119(15) 0.0066(14) -0.0001(11) -0.0008(12) -0.0009(12)
C1 0.0134(19) 0.0101(17) 0.0119(17) 0.0015(14) -0.0060(15) -0.0043(15)
C2 0.0118(19) 0.0098(17) 0.0204(19) 0.0020(15) -0.0051(16) -0.0055(15)
C3 0.0132(19) 0.0111(17) 0.021(2) -0.0058(15) -0.0066(16) -0.0019(15)
C4 0.0142(19) 0.0154(19) 0.0123(18) -0.0049(15) -0.0042(15) -0.0017(16)
C5 0.0055(17) 0.0116(17) 0.0093(16) -0.0018(14) -0.0015(14) 0.0040(14)
C6 0.0066(17) 0.0112(17) 0.0092(16) -0.0025(14) -0.0016(14) 0.0021(14)
C7 0.014(2) 0.0189(19) 0.0081(17) -0.0030(15) -0.0041(15) 0.0006(16)
C8 0.0137(19) 0.020(2) 0.0063(17) 0.0024(15) -0.0012(15) 0.0035(16)
C9 0.0120(19) 0.018(2) 0.0127(18) 0.0050(15) 0.0014(15) -0.0022(16)
C10 0.0127(19) 0.0133(18) 0.0096(17) 0.0018(14) -0.0037(15) -0.0012(15)
C11 0.0082(17) 0.0108(17) 0.0073(16) -0.0006(13) -0.0011(13) -0.0031(14)
 
_geom_special_details
;
  All esds (except the esd in the dihedral angle between two l.s. planes)
  are estimated using the full covariance matrix.  The cell esds are taken
  into account individually in the estimation of esds in distances, angles
  and torsion angles; correlations between esds in cell parameters are only
  used when they are defined by crystal symmetry.  An approximate (isotropic)
  treatment of cell esds is used for estimating esds involving l.s. planes.
;
 
loop_
  _geom_bond_atom_site_label_1
  _geom_bond_atom_site_label_2
  _geom_bond_distance
  _geom_bond_site_symmetry_2
  _geom_bond_publ_flag
Mo1 O5 1.694(2) . ?
Mo1 O2 1.719(2) . ?
Mo1 O6 1.965(2) . ?
Mo1 O4 2.016(2) . ?
Mo1 O3 2.191(2) . ?
Mo1 O7 2.200(2) . ?
Cu1 O8 1.920(2) 1_655 ?
Cu1 O1 1.933(2) . ?
Cu1 N2 1.996(3) . ?
Cu1 N1 2.006(3) . ?
Cu1 O2 2.307(3) . ?
P1 O9 1.491(2) . ?
P1 O8 1.528(2) . ?
P1 O6 1.578(3) . ?
P1 C11 1.824(4) . ?
P2 O3 1.516(2) 2_557 ?
P2 O1 1.541(2) 1_455 ?
P2 O4 1.542(3) 1_455 ?
P2 C11 1.789(4) . ?
O1 P2 1.541(2) 1_655 ?
O3 P2 1.516(2) 2_557 ?
O4 P2 1.542(3) 1_655 ?
O8 Cu1 1.920(2) 1_455 ?
N1 C1 1.328(5) . ?
N1 C5 1.358(4) . ?
N2 C10 1.339(5) . ?
N2 C6 1.347(5) . ?
C1 C2 1.396(5) . ?
C2 C3 1.372(5) . ?
C3 C4 1.397(5) . ?
C4 C5 1.389(5) . ?
C5 C6 1.484(5) . ?
C6 C7 1.392(5) . ?
C7 C8 1.394(6) . ?
C8 C9 1.382(6) . ?
C9 C10 1.387(5) . ?
 
loop_
  _geom_angle_atom_site_label_1
  _geom_angle_atom_site_label_2
  _geom_angle_atom_site_label_3
  _geom_angle
  _geom_angle_site_symmetry_1
  _geom_angle_site_symmetry_3
  _geom_angle_publ_flag
O5 Mo1 O2 103.19(12) . . ?
O5 Mo1 O6 98.62(11) . . ?
O2 Mo1 O6 95.73(11) . . ?
O5 Mo1 O4 95.77(11) . . ?
O2 Mo1 O4 93.67(11) . . ?
O6 Mo1 O4 160.53(10) . . ?
O5 Mo1 O3 163.64(11) . . ?
O2 Mo1 O3 93.09(10) . . ?
O6 Mo1 O3 81.09(10) . . ?
O4 Mo1 O3 81.41(10) . . ?
O5 Mo1 O7 85.07(11) . . ?
O2 Mo1 O7 171.14(11) . . ?
O6 Mo1 O7 86.09(10) . . ?
O4 Mo1 O7 82.15(10) . . ?
O3 Mo1 O7 78.59(9) . . ?
O8 Cu1 O1 92.88(10) 1_655 . ?
O8 Cu1 N2 92.09(11) 1_655 . ?
O1 Cu1 N2 169.87(11) . . ?
O8 Cu1 N1 172.12(11) 1_655 . ?
O1 Cu1 N1 93.06(11) . . ?
N2 Cu1 N1 81.26(12) . . ?
O8 Cu1 O2 96.91(10) 1_655 . ?
O1 Cu1 O2 90.08(10) . . ?
N2 Cu1 O2 98.07(11) . . ?
N1 Cu1 O2 88.26(11) . . ?
O9 P1 O8 113.04(14) . . ?
O9 P1 O6 111.42(15) . . ?
O8 P1 O6 106.49(14) . . ?
O9 P1 C11 110.37(15) . . ?
O8 P1 C11 110.44(15) . . ?
O6 P1 C11 104.69(15) . . ?
O3 P2 O1 109.86(14) 2_557 1_455 ?
O3 P2 O4 112.11(14) 2_557 1_455 ?
O1 P2 O4 112.20(14) 1_455 1_455 ?
O3 P2 C11 108.48(16) 2_557 . ?
O1 P2 C11 108.61(16) 1_455 . ?
O4 P2 C11 105.38(16) 1_455 . ?
P2 O1 Cu1 124.71(15) 1_655 . ?
Mo1 O2 Cu1 133.56(13) . . ?
P2 O3 Mo1 140.70(15) 2_557 . ?
P2 O4 Mo1 136.77(15) 1_655 . ?
P1 O6 Mo1 140.15(15) . . ?
P1 O8 Cu1 138.72(16) . 1_455 ?
C1 N1 C5 119.4(3) . . ?
C1 N1 Cu1 126.2(2) . . ?
C5 N1 Cu1 114.4(2) . . ?
C10 N2 C6 120.0(3) . . ?
C10 N2 Cu1 124.7(3) . . ?
C6 N2 Cu1 115.3(2) . . ?
N1 C1 C2 122.0(3) . . ?
C3 C2 C1 118.8(3) . . ?
C2 C3 C4 120.0(3) . . ?
C5 C4 C3 118.0(3) . . ?
N1 C5 C4 121.8(3) . . ?
N1 C5 C6 114.5(3) . . ?
C4 C5 C6 123.7(3) . . ?
N2 C6 C7 121.4(3) . . ?
N2 C6 C5 114.5(3) . . ?
C7 C6 C5 124.2(3) . . ?
C6 C7 C8 118.3(4) . . ?
C9 C8 C7 119.9(3) . . ?
C8 C9 C10 118.6(4) . . ?
N2 C10 C9 121.7(4) . . ?
P2 C11 P1 116.38(19) . . ?
 
_diffrn_measured_fraction_theta_max    0.937
_diffrn_reflns_theta_full              28.29
_diffrn_measured_fraction_theta_full   0.937
_refine_diff_density_max    0.685
_refine_diff_density_min   -0.871
_refine_diff_density_rms    0.045

#===END

data_try
 
_audit_creation_method            SHELXL-97
_chemical_name_systematic
;
  ?
;
_chemical_name_common             ?
_chemical_melting_point           ?
_chemical_formula_moiety          ?
_chemical_formula_sum
  'C11 H14 Cu Mo2 N2 O13 P2'
_chemical_formula_weight          699.60
 
loop_
  _atom_type_symbol
  _atom_type_description
  _atom_type_scat_dispersion_real
  _atom_type_scat_dispersion_imag
  _atom_type_scat_source
  'C'  'C'   0.0033   0.0016
  'International Tables Vol C Tables 4.2.6.8 and 6.1.1.4'
  'H'  'H'   0.0000   0.0000
  'International Tables Vol C Tables 4.2.6.8 and 6.1.1.4'
  'N'  'N'   0.0061   0.0033
  'International Tables Vol C Tables 4.2.6.8 and 6.1.1.4'
  'O'  'O'   0.0106   0.0060
  'International Tables Vol C Tables 4.2.6.8 and 6.1.1.4'
  'P'  'P'   0.1023   0.0942
  'International Tables Vol C Tables 4.2.6.8 and 6.1.1.4'
  'Cu'  'Cu'   0.3201   1.2651
  'International Tables Vol C Tables 4.2.6.8 and 6.1.1.4'
  'Mo'  'Mo'  -1.6832   0.6857
  'International Tables Vol C Tables 4.2.6.8 and 6.1.1.4'
 
_symmetry_cell_setting            Orthorhombic
_symmetry_space_group_name_H-M    Pbca
 
loop_
  _symmetry_equiv_pos_as_xyz
  'x, y, z'
  '-x+1/2, -y, z+1/2'
  '-x, y+1/2, -z+1/2'
  'x+1/2, -y+1/2, -z'
  '-x, -y, -z'
  'x-1/2, y, -z-1/2'
  'x, -y-1/2, z-1/2'
  '-x-1/2, y-1/2, z'
 
_cell_length_a                    7.8280(11)
_cell_length_b                    19.877(3)
_cell_length_c                    25.460(4)
_cell_angle_alpha                 90.00
_cell_angle_beta                  90.00
_cell_angle_gamma                 90.00
_cell_volume                      3961.5(10)
_cell_formula_units_Z             8
_cell_measurement_temperature     293(2)
_cell_measurement_reflns_used     ?
_cell_measurement_theta_min       ?
_cell_measurement_theta_max       ?
 
_exptl_crystal_description        Blocks
_exptl_crystal_colour             Dark blue
_exptl_crystal_size_max           0.15
_exptl_crystal_size_mid           0.14
_exptl_crystal_size_min           0.08
_exptl_crystal_density_meas       ?
_exptl_crystal_density_diffrn     2.346
_exptl_crystal_density_method     'not measured'
_exptl_crystal_F_000              2728
_exptl_absorpt_coefficient_mu     2.544
_exptl_absorpt_correction_type    SADABS
_exptl_absorpt_correction_T_min   ?
_exptl_absorpt_correction_T_max   ?
_exptl_absorpt_process_details    ?
 
_exptl_special_details
;
  ?
;
 
_diffrn_ambient_temperature       293(2)
_diffrn_radiation_wavelength      0.71073
_diffrn_radiation_type            MoK\a
_diffrn_radiation_source          'fine-focus sealed tube'
_diffrn_radiation_monochromator   graphite
_diffrn_measurement_device_type   ?
_diffrn_measurement_method        ?
_diffrn_detector_area_resol_mean  ?
_diffrn_standards_number          ?
_diffrn_standards_interval_count  ?
_diffrn_standards_interval_time   ?
_diffrn_standards_decay_%         ?
_diffrn_reflns_number             24776
_diffrn_reflns_av_R_equivalents   0.0647
_diffrn_reflns_av_sigmaI/netI     0.0553
_diffrn_reflns_limit_h_min        -7
_diffrn_reflns_limit_h_max        10
_diffrn_reflns_limit_k_min        -22
_diffrn_reflns_limit_k_max        26
_diffrn_reflns_limit_l_min        -33
_diffrn_reflns_limit_l_max        31
_diffrn_reflns_theta_min          1.60
_diffrn_reflns_theta_max          28.30
_reflns_number_total              4853
_reflns_number_gt                 2714
_reflns_threshold_expression      >2sigma(I)
 
_computing_data_collection        ?
_computing_cell_refinement        ?
_computing_data_reduction         ?
_computing_structure_solution     'SHELXS-97 (Sheldrick, 1990)'
_computing_structure_refinement   'SHELXL-97 (Sheldrick, 1997)'
_computing_molecular_graphics     ?
_computing_publication_material   ?
 
_refine_special_details
;
  Refinement of F^2^ against ALL reflections.  The weighted R-factor wR and
  goodness of fit S are based on F^2^, conventional R-factors R are based
  on F, with F set to zero for negative F^2^. The threshold expression of
  F^2^ > 2sigma(F^2^) is used only for calculating R-factors(gt) etc. and is
  not relevant to the choice of reflections for refinement.  R-factors based
  on F^2^ are statistically about twice as large as those based on F, and R-
  factors based on ALL data will be even larger.
;
 
_refine_ls_structure_factor_coef  Fsqd
_refine_ls_matrix_type            full
_refine_ls_weighting_scheme       calc
_refine_ls_weighting_details
  'calc w=1/[\s^2^(Fo^2^)+(0.0815P)^2^+0.0000P] where P=(Fo^2^+2Fc^2^)/3'
_atom_sites_solution_primary      direct
_atom_sites_solution_secondary    difmap
_atom_sites_solution_hydrogens    geom
_refine_ls_hydrogen_treatment     mixed
_refine_ls_extinction_method      SHELXL
_refine_ls_extinction_coef        0.0078(4)
_refine_ls_extinction_expression
  'Fc^*^=kFc[1+0.001xFc^2^\l^3^/sin(2\q)]^-1/4^'
_refine_ls_number_reflns          4853
_refine_ls_number_parameters      282
_refine_ls_number_restraints      0
_refine_ls_R_factor_all           0.0947
_refine_ls_R_factor_gt            0.0686
_refine_ls_wR_factor_ref          0.1640
_refine_ls_wR_factor_gt           0.1396
_refine_ls_goodness_of_fit_ref    0.975
_refine_ls_restrained_S_all       0.975
_refine_ls_shift/su_max           0.001
_refine_ls_shift/su_mean          0.001
 
loop_
  _atom_site_label
  _atom_site_type_symbol
  _atom_site_fract_x
  _atom_site_fract_y
  _atom_site_fract_z
  _atom_site_U_iso_or_equiv
  _atom_site_adp_type
  _atom_site_occupancy
  _atom_site_symmetry_multiplicity
  _atom_site_calc_flag
  _atom_site_refinement_flags
  _atom_site_disorder_assembly
  _atom_site_disorder_group
Mo1 Mo 0.36462(11) 1.18853(5) 0.40952(3) 0.0113(2) Uani 1 1 d . . .
Mo2 Mo 0.28080(11) 1.02665(5) 0.41964(3) 0.0114(2) Uani 1 1 d . . .
Cu1 Cu 0.16819(15) 0.84117(7) 0.60776(5) 0.0125(3) Uani 1 1 d . . .
P1 P 0.3618(3) 0.90675(14) 0.51409(10) 0.0117(6) Uani 1 1 d . . .
P2 P 0.1866(3) 1.25831(14) 0.51672(10) 0.0116(6) Uani 1 1 d . . .
O1 O 0.1728(8) 0.7694(3) 0.5566(2) 0.0132(16) Uani 1 1 d . . .
O2 O 0.2176(8) 0.9105(3) 0.5544(2) 0.0126(15) Uani 1 1 d . . .
O3 O 0.3585(9) 0.9668(3) 0.4768(3) 0.0151(16) Uani 1 1 d . . .
O4 O 0.1110(9) 0.9814(4) 0.3987(3) 0.0199(17) Uani 1 1 d . . .
O5 O 0.4352(9) 1.0064(3) 0.3760(3) 0.0171(17) Uani 1 1 d . . .
O6 O 0.1112(9) 1.0648(3) 0.4883(3) 0.0152(16) Uani 1 1 d . . .
O7 O 0.4581(8) 1.0997(3) 0.4610(2) 0.0122(15) Uani 1 1 d . . .
O8 O 0.2183(8) 1.1149(4) 0.3939(3) 0.0138(16) Uani 1 1 d . . .
O9 O 0.5357(9) 1.1685(3) 0.3701(3) 0.0159(16) Uani 1 1 d . . .
O10 O 0.2654(9) 1.2505(4) 0.3771(3) 0.0174(17) Uani 1 1 d . . .
O11 O 0.5116(9) 1.2496(3) 0.4549(3) 0.0144(15) Uani 1 1 d . . .
O12 O 0.2152(9) 1.1971(3) 0.4810(2) 0.0131(15) Uani 1 1 d . . .
O100 O 0.9067(11) 0.8639(5) 0.3746(4) 0.046(3) Uani 1 1 d . . .
N1 N 0.1487(10) 0.9083(5) 0.6656(3) 0.0138(19) Uani 1 1 d . . .
N2 N 0.0976(10) 0.7774(4) 0.6642(3) 0.0114(18) Uani 1 1 d . . .
C1 C 0.1838(13) 0.9737(5) 0.6621(4) 0.016(2) Uani 1 1 d . . .
H1 H 0.2112 0.9919 0.6295 0.019 Uiso 1 1 calc R . .
C2 C 0.1806(13) 1.0154(6) 0.7058(4) 0.019(2) Uani 1 1 d . . .
H2 H 0.2056 1.0609 0.7024 0.023 Uiso 1 1 calc R . .
C3 C 0.1398(15) 0.9886(6) 0.7544(4) 0.023(3) Uani 1 1 d . . .
H3 H 0.1396 1.0155 0.7843 0.028 Uiso 1 1 calc R . .
C4 C 0.0984(14) 0.9192(6) 0.7576(4) 0.022(3) Uani 1 1 d . . .
H4 H 0.0681 0.9000 0.7896 0.026 Uiso 1 1 calc R . .
C5 C 0.1039(12) 0.8808(5) 0.7126(4) 0.013(3) Uani 1.00(4) 1 d . . .
C6 C 0.0708(13) 0.8073(6) 0.7116(4) 0.015(2) Uani 1 1 d . . .
C7 C 0.0164(14) 0.7703(6) 0.7551(4) 0.023(3) Uani 1 1 d . . .
H7 H -0.0046 0.7913 0.7871 0.028 Uiso 1 1 calc R . .
C8 C -0.0053(14) 0.7019(6) 0.7494(4) 0.022(3) Uani 1 1 d . . .
H8 H -0.0417 0.6760 0.7777 0.026 Uiso 1 1 calc R . .
C9 C 0.0270(14) 0.6725(5) 0.7021(4) 0.020(2) Uani 1 1 d . . .
H9 H 0.0149 0.6263 0.6979 0.024 Uiso 1 1 calc R . .
C10 C 0.0782(13) 0.7127(6) 0.6601(4) 0.017(2) Uani 1 1 d . . .
H10 H 0.0994 0.6923 0.6279 0.020 Uiso 1 1 calc R . .
C11 C 0.3348(13) 0.8328(5) 0.4759(4) 0.016(2) Uani 1 1 d . . .
H11A H 0.4323 0.8274 0.4528 0.019 Uiso 1 1 calc R . .
H11B H 0.2336 0.8375 0.4542 0.019 Uiso 1 1 calc R . .
 
loop_
  _atom_site_aniso_label
  _atom_site_aniso_U_11
  _atom_site_aniso_U_22
  _atom_site_aniso_U_33
  _atom_site_aniso_U_23
  _atom_site_aniso_U_13
  _atom_site_aniso_U_12
Mo1 0.0067(4) 0.0166(5) 0.0105(4) -0.0006(4) -0.0007(3) 0.0009(4)
Mo2 0.0065(4) 0.0165(5) 0.0111(4) 0.0003(4) -0.0015(3) -0.0001(4)
Cu1 0.0078(6) 0.0185(7) 0.0114(6) -0.0003(5) 0.0014(5) 0.0007(5)
P1 0.0057(13) 0.0175(15) 0.0120(13) -0.0001(10) -0.0006(10) -0.0009(12)
P2 0.0061(13) 0.0176(15) 0.0111(13) 0.0004(11) 0.0014(9) -0.0007(11)
O1 0.016(4) 0.024(4) 0.009(3) 0.003(3) 0.000(3) 0.002(3)
O2 0.010(4) 0.016(4) 0.012(3) -0.001(3) 0.005(3) 0.004(3)
O3 0.011(4) 0.019(4) 0.015(4) 0.001(3) 0.003(3) 0.002(3)
O4 0.010(4) 0.029(5) 0.021(4) 0.002(3) -0.004(3) -0.004(3)
O5 0.021(4) 0.020(4) 0.010(4) 0.002(3) -0.002(3) 0.004(3)
O6 0.014(4) 0.019(4) 0.013(4) 0.000(3) 0.005(3) 0.001(3)
O7 0.015(3) 0.017(4) 0.014(4) 0.000(3) 0.002(3) 0.000(3)
O8 0.015(3) 0.024(4) 0.012(3) 0.005(3) -0.002(3) -0.006(3)
O9 0.011(4) 0.024(4) 0.012(4) -0.001(3) -0.002(3) -0.004(3)
O10 0.016(4) 0.018(4) 0.018(4) 0.002(3) 0.004(3) -0.004(3)
O11 0.013(4) 0.015(4) 0.015(4) -0.001(3) -0.004(3) -0.002(3)
O12 0.011(4) 0.015(4) 0.013(3) 0.004(3) 0.001(3) 0.001(3)
O100 0.031(6) 0.062(7) 0.044(6) 0.009(5) -0.006(4) 0.005(5)
N1 0.012(4) 0.028(5) 0.011(4) -0.003(4) -0.005(3) 0.004(4)
N2 0.012(4) 0.015(5) 0.017(4) -0.001(4) 0.003(3) 0.004(4)
C1 0.011(5) 0.019(6) 0.017(5) 0.006(5) 0.000(4) -0.001(5)
C2 0.014(6) 0.020(6) 0.024(6) 0.000(5) 0.001(4) 0.008(5)
C3 0.023(6) 0.032(7) 0.015(5) -0.008(5) 0.001(5) 0.005(6)
C4 0.017(6) 0.029(7) 0.019(6) -0.001(5) 0.007(4) 0.006(5)
C5 0.006(6) 0.012(6) 0.023(6) -0.003(4) 0.003(4) 0.008(4)
C6 0.005(5) 0.025(6) 0.015(5) 0.003(5) -0.007(4) -0.003(5)
C7 0.016(6) 0.037(7) 0.016(6) 0.001(5) -0.001(4) 0.002(6)
C8 0.018(6) 0.028(7) 0.019(6) 0.006(5) 0.000(5) -0.009(5)
C9 0.015(6) 0.020(6) 0.026(6) 0.006(5) 0.003(5) 0.006(5)
C10 0.005(5) 0.023(6) 0.022(6) 0.002(5) 0.001(4) 0.007(5)
C11 0.007(5) 0.017(6) 0.023(6) 0.003(4) -0.007(4) -0.002(4)
 
_geom_special_details
;
  All esds (except the esd in the dihedral angle between two l.s. planes)
  are estimated using the full covariance matrix.  The cell esds are taken
  into account individually in the estimation of esds in distances, angles
  and torsion angles; correlations between esds in cell parameters are only
  used when they are defined by crystal symmetry.  An approximate (isotropic)
  treatment of cell esds is used for estimating esds involving l.s. planes.
;
 
loop_
  _geom_bond_atom_site_label_1
  _geom_bond_atom_site_label_2
  _geom_bond_distance
  _geom_bond_site_symmetry_2
  _geom_bond_publ_flag
Mo1 O10 1.674(7) . ?
Mo1 O9 1.721(7) . ?
Mo1 O8 1.900(7) . ?
Mo1 O11 2.034(7) . ?
Mo1 O12 2.169(7) . ?
Mo1 O7 2.318(7) . ?
Mo2 O5 1.691(7) . ?
Mo2 O4 1.691(7) . ?
Mo2 O8 1.936(7) . ?
Mo2 O3 1.976(7) . ?
Mo2 O7 2.268(7) . ?
Mo2 O6 2.322(7) . ?
Cu1 O1 1.933(7) . ?
Cu1 O2 1.973(7) . ?
Cu1 N1 1.993(8) . ?
Cu1 N2 1.995(8) . ?
Cu1 O9 2.393(7) 5_676 ?
P1 O3 1.525(7) . ?
P1 O2 1.528(7) . ?
P1 O7 1.551(7) 5_676 ?
P1 C11 1.775(10) . ?
P2 O1 1.513(7) 8_665 ?
P2 O12 1.537(7) . ?
P2 O11 1.556(7) 4_476 ?
P2 C11 1.816(10) 8_665 ?
O1 P2 1.513(7) 8_655 ?
O7 P1 1.551(7) 5_676 ?
O9 Cu1 2.393(7) 5_676 ?
O11 P2 1.556(7) 4_576 ?
N1 C1 1.331(13) . ?
N1 C5 1.363(13) . ?
N2 C10 1.300(12) . ?
N2 C6 1.361(13) . ?
C1 C2 1.387(14) . ?
C2 C3 1.384(14) . ?
C3 C4 1.420(16) . ?
C4 C5 1.376(14) . ?
C5 C6 1.485(14) . ?
C6 C7 1.395(14) . ?
C7 C8 1.379(15) . ?
C8 C9 1.362(15) . ?
C9 C10 1.392(14) . ?
C11 P2 1.816(10) 8_655 ?
 
loop_
  _geom_angle_atom_site_label_1
  _geom_angle_atom_site_label_2
  _geom_angle_atom_site_label_3
  _geom_angle
  _geom_angle_site_symmetry_1
  _geom_angle_site_symmetry_3
  _geom_angle_publ_flag
O10 Mo1 O9 104.1(3) . . ?
O10 Mo1 O8 100.6(3) . . ?
O9 Mo1 O8 99.7(3) . . ?
O10 Mo1 O11 95.9(3) . . ?
O9 Mo1 O11 91.7(3) . . ?
O8 Mo1 O11 156.9(3) . . ?
O10 Mo1 O12 96.1(3) . . ?
O9 Mo1 O12 158.0(3) . . ?
O8 Mo1 O12 84.9(3) . . ?
O11 Mo1 O12 77.4(3) . . ?
O10 Mo1 O7 170.4(3) . . ?
O9 Mo1 O7 84.7(3) . . ?
O8 Mo1 O7 73.9(3) . . ?
O11 Mo1 O7 87.4(2) . . ?
O12 Mo1 O7 75.8(2) . . ?
O5 Mo2 O4 103.2(4) . . ?
O5 Mo2 O8 100.0(3) . . ?
O4 Mo2 O8 100.2(3) . . ?
O5 Mo2 O3 96.9(3) . . ?
O4 Mo2 O3 98.8(3) . . ?
O8 Mo2 O3 150.8(3) . . ?
O5 Mo2 O7 91.2(3) . . ?
O4 Mo2 O7 165.4(3) . . ?
O8 Mo2 O7 74.4(3) . . ?
O3 Mo2 O7 81.6(3) . . ?
O5 Mo2 O6 168.9(3) . . ?
O4 Mo2 O6 87.8(3) . . ?
O8 Mo2 O6 79.3(3) . . ?
O3 Mo2 O6 79.5(3) . . ?
O7 Mo2 O6 77.9(2) . . ?
O1 Cu1 O2 92.7(3) . . ?
O1 Cu1 N1 173.7(3) . . ?
O2 Cu1 N1 93.2(3) . . ?
O1 Cu1 N2 91.3(3) . . ?
O2 Cu1 N2 173.8(3) . . ?
N1 Cu1 N2 82.6(3) . . ?
O1 Cu1 O9 94.7(3) . 5_676 ?
O2 Cu1 O9 91.6(3) . 5_676 ?
N1 Cu1 O9 87.3(3) . 5_676 ?
N2 Cu1 O9 92.7(3) . 5_676 ?
O3 P1 O2 111.6(4) . . ?
O3 P1 O7 109.5(4) . 5_676 ?
O2 P1 O7 113.7(4) . 5_676 ?
O3 P1 C11 107.8(4) . . ?
O2 P1 C11 108.6(5) . . ?
O7 P1 C11 105.3(4) 5_676 . ?
O1 P2 O12 114.0(4) 8_665 . ?
O1 P2 O11 110.1(4) 8_665 4_476 ?
O12 P2 O11 108.8(4) . 4_476 ?
O1 P2 C11 109.4(5) 8_665 8_665 ?
O12 P2 C11 108.7(4) . 8_665 ?
O11 P2 C11 105.5(4) 4_476 8_665 ?
P2 O1 Cu1 125.0(4) 8_655 . ?
P1 O2 Cu1 125.0(4) . . ?
P1 O3 Mo2 159.2(5) . . ?
P1 O7 Mo2 133.9(4) 5_676 . ?
P1 O7 Mo1 125.5(4) 5_676 . ?
Mo2 O7 Mo1 91.8(2) . . ?
Mo1 O8 Mo2 118.3(3) . . ?
Mo1 O9 Cu1 129.4(3) . 5_676 ?
P2 O11 Mo1 134.5(4) 4_576 . ?
P2 O12 Mo1 129.6(4) . . ?
C1 N1 C5 120.2(9) . . ?
C1 N1 Cu1 126.1(7) . . ?
C5 N1 Cu1 113.6(7) . . ?
C10 N2 C6 119.0(9) . . ?
C10 N2 Cu1 127.1(7) . . ?
C6 N2 Cu1 113.8(7) . . ?
N1 C1 C2 121.8(9) . . ?
C3 C2 C1 119.4(11) . . ?
C2 C3 C4 118.5(10) . . ?
C5 C4 C3 118.9(10) . . ?
N1 C5 C4 121.2(10) . . ?
N1 C5 C6 115.1(9) . . ?
C4 C5 C6 123.7(10) . . ?
N2 C6 C7 121.3(10) . . ?
N2 C6 C5 114.8(9) . . ?
C7 C6 C5 123.9(10) . . ?
C8 C7 C6 118.3(10) . . ?
C9 C8 C7 119.5(10) . . ?
C8 C9 C10 119.1(10) . . ?
N2 C10 C9 122.6(10) . . ?
P1 C11 P2 111.9(6) . 8_655 ?
 
_diffrn_measured_fraction_theta_max    0.985
_diffrn_reflns_theta_full              28.30
_diffrn_measured_fraction_theta_full   0.985
_refine_diff_density_max    1.156
_refine_diff_density_min   -1.585
_refine_diff_density_rms    0.004

#===END

data_p-1
 
_audit_creation_method            SHELXL-97
_chemical_name_systematic
;
  ?
;
_chemical_name_common             ?
_chemical_melting_point           ?
_chemical_formula_moiety          ?
_chemical_formula_sum
  'C11 H14 Cu Mo2 N2 O11 P'
_chemical_formula_weight          636.63
 
loop_
  _atom_type_symbol
  _atom_type_description
  _atom_type_scat_dispersion_real
  _atom_type_scat_dispersion_imag
  _atom_type_scat_source
  'C'  'C'   0.0033   0.0016
  'International Tables Vol C Tables 4.2.6.8 and 6.1.1.4'
  'H'  'H'   0.0000   0.0000
  'International Tables Vol C Tables 4.2.6.8 and 6.1.1.4'
  'N'  'N'   0.0061   0.0033
  'International Tables Vol C Tables 4.2.6.8 and 6.1.1.4'
  'O'  'O'   0.0106   0.0060
  'International Tables Vol C Tables 4.2.6.8 and 6.1.1.4'
  'P'  'P'   0.1023   0.0942
  'International Tables Vol C Tables 4.2.6.8 and 6.1.1.4'
  'Cu'  'Cu'   0.3201   1.2651
  'International Tables Vol C Tables 4.2.6.8 and 6.1.1.4'
  'Mo'  'Mo'  -1.6832   0.6857
  'International Tables Vol C Tables 4.2.6.8 and 6.1.1.4'
 
_symmetry_cell_setting            Triclinic
_symmetry_space_group_name_H-M    P-1
 
loop_
  _symmetry_equiv_pos_as_xyz
  'x, y, z'
  '-x, -y, -z'
 
_cell_length_a                    8.0759(3)
_cell_length_b                    10.2293(4)
_cell_length_c                    12.4370(5)
_cell_angle_alpha                 70.7580(10)
_cell_angle_beta                  71.5760(10)
_cell_angle_gamma                 71.5080(10)
_cell_volume                      893.91(6)
_cell_formula_units_Z             2
_cell_measurement_temperature     293(2)
_cell_measurement_reflns_used     ?
_cell_measurement_theta_min       ?
_cell_measurement_theta_max       ?
 
_exptl_crystal_description        Needle
_exptl_crystal_colour             Blue
_exptl_crystal_size_max           0.32
_exptl_crystal_size_mid           0.18
_exptl_crystal_size_min           0.13
_exptl_crystal_density_meas       ?
_exptl_crystal_density_diffrn     2.365
_exptl_crystal_density_method     'not measured'
_exptl_crystal_F_000              620
_exptl_absorpt_coefficient_mu     2.712
_exptl_absorpt_correction_type    SADABS
_exptl_absorpt_correction_T_min   ?
_exptl_absorpt_correction_T_max   ?
_exptl_absorpt_process_details    ?
 
_exptl_special_details
;
  ?
;
 
_diffrn_ambient_temperature       293(2)
_diffrn_radiation_wavelength      0.71073
_diffrn_radiation_type            MoK\a
_diffrn_radiation_source          'fine-focus sealed tube'
_diffrn_radiation_monochromator   graphite
_diffrn_measurement_device_type   ?
_diffrn_measurement_method        ?
_diffrn_detector_area_resol_mean  ?
_diffrn_standards_number          ?
_diffrn_standards_interval_count  ?
_diffrn_standards_interval_time   ?
_diffrn_standards_decay_%         ?
_diffrn_reflns_number             6081
_diffrn_reflns_av_R_equivalents   0.0191
_diffrn_reflns_av_sigmaI/netI     0.0249
_diffrn_reflns_limit_h_min        -10
_diffrn_reflns_limit_h_max        7
_diffrn_reflns_limit_k_min        -13
_diffrn_reflns_limit_k_max        11
_diffrn_reflns_limit_l_min        -16
_diffrn_reflns_limit_l_max        14
_diffrn_reflns_theta_min          2.17
_diffrn_reflns_theta_max          28.29
_reflns_number_total              4137
_reflns_number_gt                 3778
_reflns_threshold_expression      >2sigma(I)
 
_computing_data_collection        ?
_computing_cell_refinement        ?
_computing_data_reduction         ?
_computing_structure_solution     'SHELXS-97 (Sheldrick, 1990)'
_computing_structure_refinement   'SHELXL-97 (Sheldrick, 1997)'
_computing_molecular_graphics     ?
_computing_publication_material   ?
 
_refine_special_details
;
  Refinement of F^2^ against ALL reflections.  The weighted R-factor wR and
  goodness of fit S are based on F^2^, conventional R-factors R are based
  on F, with F set to zero for negative F^2^. The threshold expression of
  F^2^ > 2sigma(F^2^) is used only for calculating R-factors(gt) etc. and is
  not relevant to the choice of reflections for refinement.  R-factors based
  on F^2^ are statistically about twice as large as those based on F, and R-
  factors based on ALL data will be even larger.
;
 
_refine_ls_structure_factor_coef  Fsqd
_refine_ls_matrix_type            full
_refine_ls_weighting_scheme       calc
_refine_ls_weighting_details
  'calc w=1/[\s^2^(Fo^2^)+(0.0540P)^2^+1.4994P] where P=(Fo^2^+2Fc^2^)/3'
_atom_sites_solution_primary      direct
_atom_sites_solution_secondary    difmap
_atom_sites_solution_hydrogens    geom
_refine_ls_hydrogen_treatment     mixed
_refine_ls_extinction_method      none
_refine_ls_extinction_coef        ?
_refine_ls_number_reflns          4137
_refine_ls_number_parameters      253
_refine_ls_number_restraints      0
_refine_ls_R_factor_all           0.0346
_refine_ls_R_factor_gt            0.0312
_refine_ls_wR_factor_ref          0.0844
_refine_ls_wR_factor_gt           0.0825
_refine_ls_goodness_of_fit_ref    1.045
_refine_ls_restrained_S_all       1.045
_refine_ls_shift/su_max           0.001
_refine_ls_shift/su_mean          0.000
 
loop_
  _atom_site_label
  _atom_site_type_symbol
  _atom_site_fract_x
  _atom_site_fract_y
  _atom_site_fract_z
  _atom_site_U_iso_or_equiv
  _atom_site_adp_type
  _atom_site_occupancy
  _atom_site_symmetry_multiplicity
  _atom_site_calc_flag
  _atom_site_refinement_flags
  _atom_site_disorder_assembly
  _atom_site_disorder_group
Mo1 Mo 0.65349(4) 0.46433(3) 0.88517(2) 0.00845(8) Uani 1 1 d . . .
Mo2 Mo 0.47444(3) 0.79502(3) 0.81259(2) 0.00783(8) Uani 1 1 d . . .
Cu1 Cu 0.58714(5) 0.13721(4) 0.78623(3) 0.00826(10) Uani 1 1 d . . .
P1 P 0.72953(10) -0.01473(8) 1.01248(7) 0.00705(16) Uani 1 1 d . . .
O1 O 0.7462(3) 0.0116(2) 0.8831(2) 0.0096(4) Uani 1 1 d . . .
O2 O 0.6371(3) 0.1275(2) 1.0496(2) 0.0099(4) Uani 1 1 d . . .
O3 O 0.6344(3) -0.1329(2) 1.0889(2) 0.0099(4) Uani 1 1 d . . .
O4 O 0.8832(3) 0.4149(3) 0.8649(2) 0.0145(5) Uani 1 1 d . . .
O5 O 0.5920(3) 0.3954(2) 1.05374(19) 0.0105(4) Uani 1 1 d . . .
O6 O 0.5982(3) 0.3543(3) 0.8322(2) 0.0145(5) Uani 1 1 d . . .
O7 O 0.6364(3) 0.6370(2) 0.7580(2) 0.0102(4) Uani 1 1 d . . .
O8 O 0.5806(3) 0.9299(2) 0.7293(2) 0.0121(5) Uani 1 1 d . . .
O9 O 0.2963(3) 0.8315(3) 0.7540(2) 0.0150(5) Uani 1 1 d . . .
O10 O 0.7000(3) 0.6966(3) 0.9314(2) 0.0121(5) Uani 1 1 d . . .
O100 O 0.0710(4) 0.6167(3) 0.8568(3) 0.0266(6) Uani 1 1 d . . .
N1 N 0.4517(4) 0.2633(3) 0.6662(2) 0.0100(5) Uani 1 1 d . . .
N2 N 0.7938(4) 0.1530(3) 0.6449(2) 0.0106(5) Uani 1 1 d . . .
C1 C 0.2739(5) 0.3228(4) 0.6884(3) 0.0135(6) Uani 1 1 d . . .
H1 H 0.2070 0.3091 0.7656 0.016 Uiso 1 1 calc R . .
C2 C 0.1882(5) 0.4041(4) 0.5984(3) 0.0142(7) Uani 1 1 d . . .
H2 H 0.0655 0.4453 0.6152 0.017 Uiso 1 1 calc R . .
C3 C 0.2885(5) 0.4231(4) 0.4832(3) 0.0163(7) Uani 1 1 d . . .
H3 H 0.2333 0.4757 0.4217 0.020 Uiso 1 1 calc R . .
C4 C 0.4721(5) 0.3627(4) 0.4607(3) 0.0143(7) Uani 1 1 d . . .
H4 H 0.5414 0.3741 0.3842 0.017 Uiso 1 1 calc R . .
C5 C 0.5504(4) 0.2850(3) 0.5545(3) 0.0106(6) Uani 1 1 d . . .
C6 C 0.7457(4) 0.2246(3) 0.5428(3) 0.0108(6) Uani 1 1 d . . .
C7 C 0.8724(5) 0.2414(4) 0.4364(3) 0.0150(7) Uani 1 1 d . . .
H7 H 0.8370 0.2890 0.3665 0.018 Uiso 1 1 calc R . .
C8 C 1.0534(5) 0.1855(4) 0.4369(3) 0.0166(7) Uani 1 1 d . . .
H8 H 1.1412 0.1982 0.3673 0.020 Uiso 1 1 calc R . .
C9 C 1.1016(5) 0.1107(4) 0.5418(3) 0.0157(7) Uani 1 1 d . . .
H9 H 1.2218 0.0711 0.5436 0.019 Uiso 1 1 calc R . .
C10 C 0.9675(4) 0.0957(4) 0.6445(3) 0.0129(6) Uani 1 1 d . . .
H10 H 0.9995 0.0443 0.7150 0.016 Uiso 1 1 calc R . .
C11 C 0.9526(4) -0.0618(3) 1.0339(3) 0.0103(6) Uani 1 1 d . . .
H11A H 0.9471 -0.0833 1.1168 0.012 Uiso 1 1 calc R . .
H11B H 1.0215 -0.1464 1.0068 0.012 Uiso 1 1 calc R . .
 
loop_
  _atom_site_aniso_label
  _atom_site_aniso_U_11
  _atom_site_aniso_U_22
  _atom_site_aniso_U_33
  _atom_site_aniso_U_23
  _atom_site_aniso_U_13
  _atom_site_aniso_U_12
Mo1 0.00882(14) 0.00778(14) 0.00864(14) -0.00389(10) -0.00003(10) -0.00197(10)
Mo2 0.00712(14) 0.00837(14) 0.00864(14) -0.00367(10) -0.00115(10) -0.00182(10)
Cu1 0.00560(19) 0.01038(19) 0.00810(19) -0.00242(15) -0.00099(14) -0.00154(14)
P1 0.0053(4) 0.0082(4) 0.0082(4) -0.0032(3) -0.0017(3) -0.0011(3)
O1 0.0080(11) 0.0125(11) 0.0086(11) -0.0029(9) -0.0030(8) -0.0015(9)
O2 0.0084(11) 0.0108(11) 0.0104(11) -0.0050(9) -0.0009(8) -0.0013(8)
O3 0.0076(10) 0.0113(11) 0.0113(11) -0.0032(9) -0.0011(8) -0.0036(8)
O4 0.0117(12) 0.0148(12) 0.0144(12) -0.0039(9) -0.0008(9) -0.0017(9)
O5 0.0123(11) 0.0108(11) 0.0083(11) -0.0040(9) -0.0004(8) -0.0031(9)
O6 0.0203(13) 0.0139(12) 0.0119(11) -0.0061(9) -0.0012(9) -0.0069(10)
O7 0.0125(11) 0.0088(10) 0.0098(11) -0.0040(9) -0.0016(8) -0.0024(9)
O8 0.0122(11) 0.0117(11) 0.0123(11) -0.0051(9) -0.0002(9) -0.0031(9)
O9 0.0142(12) 0.0163(12) 0.0164(12) -0.0053(10) -0.0054(9) -0.0032(9)
O10 0.0103(11) 0.0152(11) 0.0134(11) -0.0067(9) -0.0020(9) -0.0042(9)
O100 0.0182(14) 0.0311(16) 0.0303(16) -0.0054(13) -0.0040(12) -0.0101(12)
N1 0.0098(13) 0.0098(13) 0.0106(13) -0.0043(10) -0.0015(10) -0.0018(10)
N2 0.0112(13) 0.0095(13) 0.0119(13) -0.0041(11) -0.0018(10) -0.0032(10)
C1 0.0106(16) 0.0133(15) 0.0150(16) -0.0029(13) -0.0011(12) -0.0031(12)
C2 0.0095(15) 0.0153(16) 0.0183(17) -0.0058(13) -0.0057(12) 0.0003(12)
C3 0.0229(18) 0.0157(16) 0.0134(16) -0.0046(13) -0.0108(14) -0.0015(14)
C4 0.0178(17) 0.0169(16) 0.0099(15) -0.0068(13) -0.0030(12) -0.0032(13)
C5 0.0119(15) 0.0091(14) 0.0118(15) -0.0056(12) -0.0017(12) -0.0018(12)
C6 0.0102(15) 0.0093(14) 0.0131(15) -0.0039(12) -0.0017(12) -0.0026(12)
C7 0.0173(17) 0.0147(16) 0.0106(15) -0.0030(13) -0.0001(12) -0.0042(13)
C8 0.0134(17) 0.0169(17) 0.0168(17) -0.0077(14) 0.0040(13) -0.0039(13)
C9 0.0102(16) 0.0172(17) 0.0200(17) -0.0087(14) -0.0012(13) -0.0019(13)
C10 0.0111(16) 0.0140(16) 0.0153(16) -0.0064(13) -0.0025(12) -0.0029(12)
C11 0.0071(15) 0.0102(15) 0.0128(15) -0.0017(12) -0.0018(12) -0.0027(12)
 
_geom_special_details
;
  All esds (except the esd in the dihedral angle between two l.s. planes)
  are estimated using the full covariance matrix.  The cell esds are taken
  into account individually in the estimation of esds in distances, angles
  and torsion angles; correlations between esds in cell parameters are only
  used when they are defined by crystal symmetry.  An approximate (isotropic)
  treatment of cell esds is used for estimating esds involving l.s. planes.
;
 
loop_
  _geom_bond_atom_site_label_1
  _geom_bond_atom_site_label_2
  _geom_bond_distance
  _geom_bond_site_symmetry_2
  _geom_bond_publ_flag
Mo1 O6 1.701(2) . ?
Mo1 O4 1.719(2) . ?
Mo1 O5 1.931(2) . ?
Mo1 O7 1.945(2) . ?
Mo1 O5 2.128(2) 2_667 ?
Mo1 Mo2 3.1715(4) . ?
Mo2 O9 1.698(2) . ?
Mo2 O8 1.720(2) . ?
Mo2 O7 1.899(2) . ?
Mo2 O2 1.961(2) 2_667 ?
Mo2 O5 2.193(2) 2_667 ?
Mo2 O10 2.464(2) . ?
Cu1 O1 1.914(2) . ?
Cu1 O3 1.966(2) 2_657 ?
Cu1 N1 1.989(3) . ?
Cu1 N2 2.007(3) . ?
P1 O1 1.510(2) . ?
P1 O3 1.524(2) . ?
P1 O2 1.557(2) . ?
P1 C11 1.794(3) . ?
O2 Mo2 1.961(2) 2_667 ?
O3 Cu1 1.966(2) 2_657 ?
O5 Mo1 2.128(2) 2_667 ?
O5 Mo2 2.193(2) 2_667 ?
N1 C1 1.347(4) . ?
N1 C5 1.351(4) . ?
N2 C10 1.337(4) . ?
N2 C6 1.349(4) . ?
C1 C2 1.391(5) . ?
C2 C3 1.390(5) . ?
C3 C4 1.388(5) . ?
C4 C5 1.389(5) . ?
C5 C6 1.479(4) . ?
C6 C7 1.390(5) . ?
C7 C8 1.392(5) . ?
C8 C9 1.383(5) . ?
C9 C10 1.389(5) . ?
C11 C11 1.548(6) 2_757 ?
 
loop_
  _geom_angle_atom_site_label_1
  _geom_angle_atom_site_label_2
  _geom_angle_atom_site_label_3
  _geom_angle
  _geom_angle_site_symmetry_1
  _geom_angle_site_symmetry_3
  _geom_angle_publ_flag
O6 Mo1 O4 106.50(12) . . ?
O6 Mo1 O5 106.02(11) . . ?
O4 Mo1 O5 97.82(11) . . ?
O6 Mo1 O7 100.96(11) . . ?
O4 Mo1 O7 98.40(11) . . ?
O5 Mo1 O7 142.90(10) . . ?
O6 Mo1 O5 106.27(11) . 2_667 ?
O4 Mo1 O5 147.22(11) . 2_667 ?
O5 Mo1 O5 73.53(10) . 2_667 ?
O7 Mo1 O5 74.79(9) . 2_667 ?
O6 Mo1 Mo2 117.61(9) . . ?
O4 Mo1 Mo2 117.15(8) . . ?
O5 Mo1 Mo2 109.45(7) . . ?
O7 Mo1 Mo2 33.93(7) . . ?
O5 Mo1 Mo2 43.59(6) 2_667 . ?
O9 Mo2 O8 103.38(12) . . ?
O9 Mo2 O7 104.09(11) . . ?
O8 Mo2 O7 101.34(10) . . ?
O9 Mo2 O2 101.74(11) . 2_667 ?
O8 Mo2 O2 96.23(10) . 2_667 ?
O7 Mo2 O2 144.23(10) . 2_667 ?
O9 Mo2 O5 94.66(10) . 2_667 ?
O8 Mo2 O5 161.97(10) . 2_667 ?
O7 Mo2 O5 74.13(9) . 2_667 ?
O2 Mo2 O5 79.54(9) 2_667 2_667 ?
O9 Mo2 O10 166.36(10) . . ?
O8 Mo2 O10 90.22(10) . . ?
O7 Mo2 O10 73.69(9) . . ?
O2 Mo2 O10 75.36(9) 2_667 . ?
O5 Mo2 O10 71.74(8) 2_667 . ?
O9 Mo2 Mo1 113.02(8) . . ?
O8 Mo2 Mo1 127.40(8) . . ?
O7 Mo2 Mo1 34.86(7) . . ?
O2 Mo2 Mo1 111.27(7) 2_667 . ?
O5 Mo2 Mo1 41.99(6) 2_667 . ?
O10 Mo2 Mo1 57.44(6) . . ?
O1 Cu1 O3 95.87(10) . 2_657 ?
O1 Cu1 N1 171.75(11) . . ?
O3 Cu1 N1 92.14(10) 2_657 . ?
O1 Cu1 N2 90.97(11) . . ?
O3 Cu1 N2 173.00(11) 2_657 . ?
N1 Cu1 N2 80.97(11) . . ?
O1 P1 O3 113.51(13) . . ?
O1 P1 O2 109.50(13) . . ?
O3 P1 O2 111.76(13) . . ?
O1 P1 C11 107.36(14) . . ?
O3 P1 C11 109.29(14) . . ?
O2 P1 C11 104.98(14) . . ?
P1 O1 Cu1 130.32(14) . . ?
P1 O2 Mo2 142.46(15) . 2_667 ?
P1 O3 Cu1 133.25(14) . 2_657 ?
Mo1 O5 Mo1 106.47(10) . 2_667 ?
Mo1 O5 Mo2 139.16(12) . 2_667 ?
Mo1 O5 Mo2 94.43(9) 2_667 2_667 ?
Mo2 O7 Mo1 111.21(11) . . ?
C1 N1 C5 119.6(3) . . ?
C1 N1 Cu1 125.2(2) . . ?
C5 N1 Cu1 115.1(2) . . ?
C10 N2 C6 119.4(3) . . ?
C10 N2 Cu1 125.9(2) . . ?
C6 N2 Cu1 114.6(2) . . ?
N1 C1 C2 121.4(3) . . ?
C3 C2 C1 119.1(3) . . ?
C4 C3 C2 119.3(3) . . ?
C3 C4 C5 118.9(3) . . ?
N1 C5 C4 121.6(3) . . ?
N1 C5 C6 114.3(3) . . ?
C4 C5 C6 124.1(3) . . ?
N2 C6 C7 121.7(3) . . ?
N2 C6 C5 114.5(3) . . ?
C7 C6 C5 123.7(3) . . ?
C6 C7 C8 118.5(3) . . ?
C9 C8 C7 119.4(3) . . ?
C8 C9 C10 118.9(3) . . ?
N2 C10 C9 121.9(3) . . ?
C11 C11 P1 110.7(3) 2_757 . ?
 
_diffrn_measured_fraction_theta_max    0.929
_diffrn_reflns_theta_full              28.29
_diffrn_measured_fraction_theta_full   0.929
_refine_diff_density_max    0.964
_refine_diff_density_min   -0.820
_refine_diff_density_rms    0.038

#===END

data_try
 
_audit_creation_method            SHELXL-97
_chemical_name_systematic
;
  ?
;
_chemical_name_common             ?
_chemical_melting_point           ?
_chemical_formula_moiety          ?
_chemical_formula_sum
  'C13 H14 Cu Mo2 N2 O11 P2'
_chemical_formula_weight          691.62
 
loop_
  _atom_type_symbol
  _atom_type_description
  _atom_type_scat_dispersion_real
  _atom_type_scat_dispersion_imag
  _atom_type_scat_source
  'C'  'C'   0.0033   0.0016
  'International Tables Vol C Tables 4.2.6.8 and 6.1.1.4'
  'H'  'H'   0.0000   0.0000
  'International Tables Vol C Tables 4.2.6.8 and 6.1.1.4'
  'N'  'N'   0.0061   0.0033
  'International Tables Vol C Tables 4.2.6.8 and 6.1.1.4'
  'O'  'O'   0.0106   0.0060
  'International Tables Vol C Tables 4.2.6.8 and 6.1.1.4'
  'P'  'P'   0.1023   0.0942
  'International Tables Vol C Tables 4.2.6.8 and 6.1.1.4'
  'Cu'  'Cu'   0.3201   1.2651
  'International Tables Vol C Tables 4.2.6.8 and 6.1.1.4'
  'Mo'  'Mo'  -1.6832   0.6857
  'International Tables Vol C Tables 4.2.6.8 and 6.1.1.4'
 
_symmetry_cell_setting            Monoclinic
_symmetry_space_group_name_H-M    P2(1)/c
 
loop_
  _symmetry_equiv_pos_as_xyz
  'x, y, z'
  '-x, y+1/2, -z+1/2'
  '-x, -y, -z'
  'x, -y-1/2, z-1/2'
 
_cell_length_a                    8.5535(8)
_cell_length_b                    24.723(2)
_cell_length_c                    9.6296(9)
_cell_angle_alpha                 90.00
_cell_angle_beta                  105.726(2)
_cell_angle_gamma                 90.00
_cell_volume                      1960.1(3)
_cell_formula_units_Z             4
_cell_measurement_temperature     293(2)
_cell_measurement_reflns_used     ?
_cell_measurement_theta_min       ?
_cell_measurement_theta_max       ?
 
_exptl_crystal_description        Needle
_exptl_crystal_colour             Blue
_exptl_crystal_size_max           0.26
_exptl_crystal_size_mid           0.15
_exptl_crystal_size_min           0.14
_exptl_crystal_density_meas       ?
_exptl_crystal_density_diffrn     2.344
_exptl_crystal_density_method     'not measured'
_exptl_crystal_F_000              1348
_exptl_absorpt_coefficient_mu     2.562
_exptl_absorpt_correction_type    SADABS
_exptl_absorpt_correction_T_min   ?
_exptl_absorpt_correction_T_max   ?
_exptl_absorpt_process_details    ?
 
_exptl_special_details
;
  ?
;
 
_diffrn_ambient_temperature       293(2)
_diffrn_radiation_wavelength      0.71073
_diffrn_radiation_type            MoK\a
_diffrn_radiation_source          'fine-focus sealed tube'
_diffrn_radiation_monochromator   graphite
_diffrn_measurement_device_type   ?
_diffrn_measurement_method        ?
_diffrn_detector_area_resol_mean  ?
_diffrn_standards_number          ?
_diffrn_standards_interval_count  ?
_diffrn_standards_interval_time   ?
_diffrn_standards_decay_%         ?
_diffrn_reflns_number             12494
_diffrn_reflns_av_R_equivalents   0.0778
_diffrn_reflns_av_sigmaI/netI     0.0903
_diffrn_reflns_limit_h_min        -7
_diffrn_reflns_limit_h_max        11
_diffrn_reflns_limit_k_min        -25
_diffrn_reflns_limit_k_max        32
_diffrn_reflns_limit_l_min        -12
_diffrn_reflns_limit_l_max        12
_diffrn_reflns_theta_min          1.65
_diffrn_reflns_theta_max          28.27
_reflns_number_total              4638
_reflns_number_gt                 2905
_reflns_threshold_expression      >2sigma(I)
 
_computing_data_collection        ?
_computing_cell_refinement        ?
_computing_data_reduction         ?
_computing_structure_solution     'SHELXS-97 (Sheldrick, 1990)'
_computing_structure_refinement   'SHELXL-97 (Sheldrick, 1997)'
_computing_molecular_graphics     ?
_computing_publication_material   ?
 
_refine_special_details
;
  Refinement of F^2^ against ALL reflections.  The weighted R-factor wR and
  goodness of fit S are based on F^2^, conventional R-factors R are based
  on F, with F set to zero for negative F^2^. The threshold expression of
  F^2^ > 2sigma(F^2^) is used only for calculating R-factors(gt) etc. and is
  not relevant to the choice of reflections for refinement.  R-factors based
  on F^2^ are statistically about twice as large as those based on F, and R-
  factors based on ALL data will be even larger.
;
 
_refine_ls_structure_factor_coef  Fsqd
_refine_ls_matrix_type            full
_refine_ls_weighting_scheme       calc
_refine_ls_weighting_details
  'calc w=1/[\s^2^(Fo^2^)+(0.0642P)^2^+2.1068P] where P=(Fo^2^+2Fc^2^)/3'
_atom_sites_solution_primary      direct
_atom_sites_solution_secondary    difmap
_atom_sites_solution_hydrogens    geom
_refine_ls_hydrogen_treatment     mixed
_refine_ls_extinction_method      none
_refine_ls_extinction_coef        ?
_refine_ls_number_reflns          4638
_refine_ls_number_parameters      281
_refine_ls_number_restraints      0
_refine_ls_R_factor_all           0.0739
_refine_ls_R_factor_gt            0.0532
_refine_ls_wR_factor_ref          0.1454
_refine_ls_wR_factor_gt           0.1207
_refine_ls_goodness_of_fit_ref    1.103
_refine_ls_restrained_S_all       1.103
_refine_ls_shift/su_max           0.002
_refine_ls_shift/su_mean          0.001
 
loop_
  _atom_site_label
  _atom_site_type_symbol
  _atom_site_fract_x
  _atom_site_fract_y
  _atom_site_fract_z
  _atom_site_U_iso_or_equiv
  _atom_site_adp_type
  _atom_site_occupancy
  _atom_site_symmetry_multiplicity
  _atom_site_calc_flag
  _atom_site_refinement_flags
  _atom_site_disorder_assembly
  _atom_site_disorder_group
Mo1 Mo 0.33323(8) 0.66682(3) 0.06021(6) 0.00749(17) Uani 1 1 d . . .
Mo2 Mo 0.57743(8) 0.66417(3) 0.36911(6) 0.00709(17) Uani 1 1 d . . .
Cu1 Cu -0.04632(12) 0.63860(4) 0.20983(10) 0.0092(2) Uani 1 1 d . . .
P1 P -0.2868(2) 0.73551(8) 0.1062(2) 0.0073(4) Uani 1 1 d . . .
P2 P 0.1978(2) 0.73255(8) 0.3276(2) 0.0065(4) Uani 1 1 d . . .
O1 O -0.3616(6) 0.7645(2) -0.0396(5) 0.0101(11) Uani 1 1 d . . .
O2 O -0.1656(6) 0.6939(2) 0.0841(5) 0.0106(11) Uani 1 1 d . . .
O3 O 0.0793(6) 0.6891(2) 0.3472(5) 0.0083(11) Uani 1 1 d . . .
O4 O 0.3390(7) 0.7093(2) 0.2753(6) 0.0128(17) Uani 1.000(17) 1 d . . .
O5 O 0.2721(6) 0.7390(2) -0.0246(5) 0.0096(11) Uani 1 1 d . . .
O6 O 0.1441(6) 0.6420(2) 0.0513(6) 0.0126(12) Uani 1 1 d . . .
O7 O 0.3786(6) 0.6381(2) -0.0840(5) 0.0113(11) Uani 1 1 d . . .
O8 O 0.4563(7) 0.6210(2) 0.2113(6) 0.0106(10) Uani 1 1 d . . .
O9 O 0.5727(6) 0.7099(2) 0.1568(5) 0.0074(11) Uani 1 1 d . . .
O10 O 0.5314(7) 0.6331(2) 0.5103(5) 0.0127(12) Uani 1 1 d . . .
O11 O 0.7681(6) 0.6400(2) 0.3765(5) 0.0103(11) Uani 1 1 d . . .
N1 N 0.0654(9) 0.5734(3) 0.3177(7) 0.0176(16) Uani 1 1 d . . .
N2 N -0.1708(8) 0.5801(3) 0.0821(7) 0.0120(14) Uani 1 1 d . . .
C1 C -0.2876(12) 0.5880(4) -0.0396(9) 0.028(2) Uani 1 1 d . . .
H1 H -0.3168 0.6233 -0.0691 0.033 Uiso 1 1 calc R . .
C2 C -0.3658(15) 0.5463(4) -0.1227(12) 0.031(4) Uani 1 1 d . . .
H2 H -0.4446 0.5529 -0.2088 0.061 Uiso 1 1 calc R . .
C3 C -0.3252(15) 0.4939(4) -0.0758(12) 0.026(3) Uani 1 1 d . . .
H3 H -0.3801 0.4647 -0.1282 0.055 Uiso 1 1 calc R . .
C4 C -0.2038(12) 0.4851(3) 0.0480(10) 0.025(2) Uani 1 1 d . . .
H4 H -0.1724 0.4501 0.0781 0.030 Uiso 1 1 calc R . .
C5 C -0.1288(10) 0.5285(3) 0.1271(9) 0.0151(17) Uani 1 1 d . . .
C6 C 0.0063(11) 0.5254(4) 0.2599(10) 0.022(2) Uani 1 1 d . . .
C7 C 0.0657(12) 0.4764(4) 0.3219(12) 0.040(3) Uani 1 1 d . . .
H7 H 0.0217 0.4437 0.2823 0.048 Uiso 1 1 calc R . .
C8 C 0.1972(15) 0.4785(4) 0.4490(15) 0.034(5) Uani 1 1 d . . .
H8 H 0.2418 0.4467 0.4947 0.089 Uiso 1 1 calc R . .
C9 C 0.2577(17) 0.5278(5) 0.5037(16) 0.035(5) Uani 1 1 d . . .
H9 H 0.3443 0.5298 0.5864 0.090 Uiso 1 1 calc R . .
C10 C 0.1887(12) 0.5740(4) 0.4349(11) 0.032(3) Uani 1 1 d . . .
H10 H 0.2305 0.6073 0.4726 0.039 Uiso 1 1 calc R . .
C11 C 0.0994(9) 0.7820(3) 0.1934(7) 0.0082(15) Uani 1 1 d . . .
H11A H 0.1819 0.8074 0.1827 0.010 Uiso 1 1 calc R . .
H11B H 0.0606 0.7633 0.1021 0.010 Uiso 1 1 calc R . .
C12 C -0.0448(9) 0.8155(3) 0.2181(8) 0.0088(14) Uani 1 1 d . . .
H12A H -0.0031 0.8385 0.3016 0.011 Uiso 1 1 calc R . .
H12B H -0.0844 0.8391 0.1355 0.011 Uiso 1 1 calc R . .
C13 C -0.1897(9) 0.7838(3) 0.2412(8) 0.0073(15) Uani 1 1 d . . .
H13A H -0.2712 0.8097 0.2509 0.009 Uiso 1 1 calc R . .
H13B H -0.1533 0.7648 0.3324 0.009 Uiso 1 1 calc R . .
 
loop_
  _atom_site_aniso_label
  _atom_site_aniso_U_11
  _atom_site_aniso_U_22
  _atom_site_aniso_U_33
  _atom_site_aniso_U_23
  _atom_site_aniso_U_13
  _atom_site_aniso_U_12
Mo1 0.0071(3) 0.0106(3) 0.0051(3) -0.0005(3) 0.0020(3) -0.0005(3)
Mo2 0.0055(3) 0.0107(3) 0.0053(3) 0.0006(3) 0.0019(2) 0.0003(3)
Cu1 0.0070(4) 0.0104(5) 0.0099(4) 0.0001(4) 0.0018(3) -0.0004(4)
P1 0.0062(10) 0.0117(10) 0.0046(9) 0.0019(8) 0.0026(8) 0.0016(8)
P2 0.0036(10) 0.0112(10) 0.0046(9) -0.0004(8) 0.0010(7) -0.0003(8)
O1 0.007(3) 0.016(3) 0.006(3) 0.005(2) 0.000(2) 0.001(2)
O2 0.012(3) 0.012(3) 0.010(3) 0.002(2) 0.007(2) 0.005(2)
O3 0.014(3) 0.014(3) 0.008(2) 0.001(2) 0.003(2) -0.003(2)
O4 0.012(3) 0.017(3) 0.012(3) -0.004(2) 0.009(2) 0.001(2)
O5 0.008(3) 0.013(3) 0.008(3) -0.001(2) 0.002(2) 0.001(2)
O6 0.012(3) 0.016(3) 0.011(3) 0.004(2) 0.006(2) -0.003(2)
O7 0.011(3) 0.016(3) 0.007(3) -0.001(2) 0.004(2) 0.001(2)
O8 0.011(3) 0.009(3) 0.011(2) 0.002(2) 0.002(2) -0.001(2)
O9 0.012(3) 0.017(3) 0.013(2) -0.001(2) 0.001(2) -0.001(2)
O10 0.016(3) 0.014(3) 0.010(3) -0.001(2) 0.006(2) -0.003(2)
O11 0.006(3) 0.015(3) 0.008(3) -0.001(2) 0.000(2) 0.003(2)
N1 0.015(4) 0.015(4) 0.024(4) 0.005(3) 0.007(3) 0.002(3)
N2 0.011(4) 0.011(3) 0.017(3) 0.000(3) 0.009(3) -0.004(3)
C1 0.023(6) 0.017(5) 0.018(5) -0.007(4) -0.002(4) 0.001(4)
C2 0.023(8) 0.026(6) 0.037(7) 0.003(5) -0.033(6) 0.003(6)
C3 0.021(9) 0.018(5) 0.039(7) -0.005(5) -0.021(6) -0.005(5)
C4 0.035(6) 0.005(4) 0.033(5) 0.001(4) 0.005(4) -0.003(4)
C5 0.013(4) 0.017(4) 0.017(4) 0.003(4) 0.006(3) -0.002(4)
C6 0.017(5) 0.018(5) 0.026(5) 0.003(4) -0.003(4) -0.001(4)
C7 0.028(6) 0.015(5) 0.027(8) 0.006(5) -0.021(5) -0.001(4)
C8 0.031(9) 0.022(6) 0.021(11) 0.027(7) -0.060(8) -0.007(6)
C9 0.034(11) 0.037(7) 0.037(10) 0.025(7) -0.044(8) -0.011(7)
C10 0.027(6) 0.023(5) 0.035(6) 0.009(4) -0.012(5) -0.008(4)
C11 0.014(4) 0.016(4) 0.015(3) -0.003(3) 0.002(3) -0.003(3)
C12 0.015(3) 0.013(4) 0.017(3) 0.002(3) 0.000(3) 0.002(3)
C13 0.014(4) 0.012(4) 0.017(3) 0.000(3) 0.004(3) -0.003(3)
 
_geom_special_details
;
  All esds (except the esd in the dihedral angle between two l.s. planes)
  are estimated using the full covariance matrix.  The cell esds are taken
  into account individually in the estimation of esds in distances, angles
  and torsion angles; correlations between esds in cell parameters are only
  used when they are defined by crystal symmetry.  An approximate (isotropic)
  treatment of cell esds is used for estimating esds involving l.s. planes.
;
 
loop_
  _geom_bond_atom_site_label_1
  _geom_bond_atom_site_label_2
  _geom_bond_distance
  _geom_bond_site_symmetry_2
  _geom_bond_publ_flag
Mo1 O7 1.696(5) . ?
Mo1 O6 1.710(5) . ?
Mo1 O8 1.917(5) . ?
Mo1 O5 1.972(5) . ?
Mo1 O9 2.272(5) . ?
Mo1 O4 2.311(5) . ?
Mo1 Mo2 3.1380(9) . ?
Mo2 O10 1.698(5) . ?
Mo2 O11 1.721(5) . ?
Mo2 O8 1.915(5) . ?
Mo2 O1 1.977(5) 4_676 ?
Mo2 O4 2.284(5) . ?
Mo2 O9 2.327(5) . ?
Cu1 O3 1.923(5) . ?
Cu1 O2 1.925(5) . ?
Cu1 N2 2.007(7) . ?
Cu1 N1 2.014(7) . ?
P1 O2 1.516(5) . ?
P1 O9 1.549(5) 1_455 ?
P1 O1 1.551(5) . ?
P1 C13 1.794(7) . ?
P2 O3 1.522(5) . ?
P2 O4 1.541(5) . ?
P2 O5 1.561(5) 4_576 ?
P2 C11 1.812(8) . ?
O1 Mo2 1.977(5) 4_475 ?
O5 P2 1.561(5) 4_575 ?
O9 P1 1.550(5) 1_655 ?
N1 C10 1.320(11) . ?
N1 C6 1.349(11) . ?
N2 C1 1.333(11) . ?
N2 C5 1.362(10) . ?
C1 C2 1.365(13) . ?
C2 C3 1.385(14) . ?
C3 C4 1.370(13) . ?
C4 C5 1.371(12) . ?
C5 C6 1.476(12) . ?
C6 C7 1.383(13) . ?
C7 C8 1.421(14) . ?
C8 C9 1.371(16) . ?
C9 C10 1.373(14) . ?
C11 C12 1.557(10) . ?
C12 C13 1.533(10) . ?
 
loop_
  _geom_angle_atom_site_label_1
  _geom_angle_atom_site_label_2
  _geom_angle_atom_site_label_3
  _geom_angle
  _geom_angle_site_symmetry_1
  _geom_angle_site_symmetry_3
  _geom_angle_publ_flag
O7 Mo1 O6 103.4(3) . . ?
O7 Mo1 O8 100.0(2) . . ?
O6 Mo1 O8 98.2(2) . . ?
O7 Mo1 O5 97.7(2) . . ?
O6 Mo1 O5 99.4(2) . . ?
O8 Mo1 O5 151.3(2) . . ?
O7 Mo1 O9 98.7(2) . . ?
O6 Mo1 O9 157.5(2) . . ?
O8 Mo1 O9 73.6(2) . . ?
O5 Mo1 O9 81.6(2) . . ?
O7 Mo1 O4 166.0(2) . . ?
O6 Mo1 O4 89.9(2) . . ?
O8 Mo1 O4 73.4(2) . . ?
O5 Mo1 O4 84.2(2) . . ?
O9 Mo1 O4 67.80(17) . . ?
O7 Mo1 Mo2 121.75(18) . . ?
O6 Mo1 Mo2 114.67(17) . . ?
O8 Mo1 Mo2 34.99(16) . . ?
O5 Mo1 Mo2 116.43(15) . . ?
O9 Mo1 Mo2 47.71(12) . . ?
O4 Mo1 Mo2 46.58(14) . . ?
O10 Mo2 O11 103.5(3) . . ?
O10 Mo2 O8 101.0(2) . . ?
O11 Mo2 O8 98.2(2) . . ?
O10 Mo2 O1 97.9(2) . 4_676 ?
O11 Mo2 O1 99.2(2) . 4_676 ?
O8 Mo2 O1 150.5(2) . 4_676 ?
O10 Mo2 O4 99.3(2) . . ?
O11 Mo2 O4 157.0(2) . . ?
O8 Mo2 O4 74.0(2) . . ?
O1 Mo2 O4 80.8(2) 4_676 . ?
O10 Mo2 O9 166.1(2) . . ?
O11 Mo2 O9 89.8(2) . . ?
O8 Mo2 O9 72.34(19) . . ?
O1 Mo2 O9 84.1(2) 4_676 . ?
O4 Mo2 O9 67.33(17) . . ?
O10 Mo2 Mo1 121.95(19) . . ?
O11 Mo2 Mo1 115.24(17) . . ?
O8 Mo2 Mo1 35.05(15) . . ?
O1 Mo2 Mo1 115.50(15) 4_676 . ?
O4 Mo2 Mo1 47.28(13) . . ?
O9 Mo2 Mo1 46.25(12) . . ?
O3 Cu1 O2 94.2(2) . . ?
O3 Cu1 N2 174.2(2) . . ?
O2 Cu1 N2 91.4(3) . . ?
O3 Cu1 N1 93.8(3) . . ?
O2 Cu1 N1 171.7(3) . . ?
N2 Cu1 N1 80.7(3) . . ?
O2 P1 O9 112.7(3) . 1_455 ?
O2 P1 O1 108.4(3) . . ?
O9 P1 O1 108.0(3) 1_455 . ?
O2 P1 C13 110.7(3) . . ?
O9 P1 C13 106.8(3) 1_455 . ?
O1 P1 C13 110.2(3) . . ?
O3 P2 O4 112.6(3) . . ?
O3 P2 O5 109.0(3) . 4_576 ?
O4 P2 O5 107.7(3) . 4_576 ?
O3 P2 C11 111.6(3) . . ?
O4 P2 C11 105.8(3) . . ?
O5 P2 C11 109.9(3) 4_576 . ?
P1 O1 Mo2 144.0(3) . 4_475 ?
P1 O2 Cu1 131.3(3) . . ?
P2 O3 Cu1 129.8(3) . . ?
P2 O4 Mo2 138.4(3) . . ?
P2 O4 Mo1 129.4(3) . . ?
Mo2 O4 Mo1 86.14(17) . . ?
P2 O5 Mo1 141.5(3) 4_575 . ?
Mo2 O8 Mo1 110.0(2) . . ?
P1 O9 Mo1 138.8(3) 1_655 . ?
P1 O9 Mo2 130.1(3) 1_655 . ?
Mo1 O9 Mo2 86.04(17) . . ?
C10 N1 C6 119.1(8) . . ?
C10 N1 Cu1 126.1(7) . . ?
C6 N1 Cu1 114.8(6) . . ?
C1 N2 C5 119.2(8) . . ?
C1 N2 Cu1 125.4(6) . . ?
C5 N2 Cu1 115.4(6) . . ?
N2 C1 C2 122.4(9) . . ?
C1 C2 C3 118.5(10) . . ?
C4 C3 C2 119.7(10) . . ?
C3 C4 C5 119.4(9) . . ?
N2 C5 C4 120.8(8) . . ?
N2 C5 C6 113.7(7) . . ?
C4 C5 C6 125.4(8) . . ?
N1 C6 C7 122.6(8) . . ?
N1 C6 C5 115.3(8) . . ?
C7 C6 C5 122.1(8) . . ?
C6 C7 C8 116.9(9) . . ?
C9 C8 C7 119.4(10) . . ?
C8 C9 C10 119.1(11) . . ?
N1 C10 C9 122.8(10) . . ?
C12 C11 P2 119.0(5) . . ?
C13 C12 C11 117.1(6) . . ?
C12 C13 P1 118.0(5) . . ?
 
_diffrn_measured_fraction_theta_max    0.956
_diffrn_reflns_theta_full              28.27
_diffrn_measured_fraction_theta_full   0.956
_refine_diff_density_max    1.093
_refine_diff_density_min   -1.347
_refine_diff_density_rms    0.048

#===END

data_p-1
 
_audit_creation_method            SHELXL-97
_chemical_name_systematic
;
  ?
;
_chemical_name_common             ?
_chemical_melting_point           ?
_chemical_formula_moiety          ?
_chemical_formula_sum
  'C34 H18 Cu2 Mo5 N6 O23 P2'
_chemical_formula_weight          1547.26
 
loop_
  _atom_type_symbol
  _atom_type_description
  _atom_type_scat_dispersion_real
  _atom_type_scat_dispersion_imag
  _atom_type_scat_source
  'C'  'C'   0.0033   0.0016
  'International Tables Vol C Tables 4.2.6.8 and 6.1.1.4'
  'H'  'H'   0.0000   0.0000
  'International Tables Vol C Tables 4.2.6.8 and 6.1.1.4'
  'N'  'N'   0.0061   0.0033
  'International Tables Vol C Tables 4.2.6.8 and 6.1.1.4'
  'O'  'O'   0.0106   0.0060
  'International Tables Vol C Tables 4.2.6.8 and 6.1.1.4'
  'P'  'P'   0.1023   0.0942
  'International Tables Vol C Tables 4.2.6.8 and 6.1.1.4'
  'Cu'  'Cu'   0.3201   1.2651
  'International Tables Vol C Tables 4.2.6.8 and 6.1.1.4'
  'Mo'  'Mo'  -1.6832   0.6857
  'International Tables Vol C Tables 4.2.6.8 and 6.1.1.4'
 
_symmetry_cell_setting            Triclinic
_symmetry_space_group_name_H-M    P-1
 
loop_
  _symmetry_equiv_pos_as_xyz
  'x, y, z'
  '-x, -y, -z'
 
_cell_length_a                    11.3132(6)
_cell_length_b                    12.8735(7)
_cell_length_c                    18.2974(10)
_cell_angle_alpha                 71.6900(10)
_cell_angle_beta                  82.9100(10)
_cell_angle_gamma                 65.5800(10)
_cell_volume                      2303.5(2)
_cell_formula_units_Z             2
_cell_measurement_temperature     293(2)
_cell_measurement_reflns_used     ?
_cell_measurement_theta_min       ?
_cell_measurement_theta_max       ?
 
_exptl_crystal_description        Block
_exptl_crystal_colour             Blue
_exptl_crystal_size_max           0.23
_exptl_crystal_size_mid           0.17
_exptl_crystal_size_min           0.13
_exptl_crystal_density_meas       ?
_exptl_crystal_density_diffrn     2.231
_exptl_crystal_density_method     'not measured'
_exptl_crystal_F_000              1492
_exptl_absorpt_coefficient_mu     2.383
_exptl_absorpt_correction_type    SADABS
_exptl_absorpt_correction_T_min   ?
_exptl_absorpt_correction_T_max   ?
_exptl_absorpt_process_details    ?
 
_exptl_special_details
;
  ?
;
 
_diffrn_ambient_temperature       293(2)
_diffrn_radiation_wavelength      0.71073
_diffrn_radiation_type            MoK\a
_diffrn_radiation_source          'fine-focus sealed tube'
_diffrn_radiation_monochromator   graphite
_diffrn_measurement_device_type   ?
_diffrn_measurement_method        ?
_diffrn_detector_area_resol_mean  ?
_diffrn_standards_number          ?
_diffrn_standards_interval_count  ?
_diffrn_standards_interval_time   ?
_diffrn_standards_decay_%         ?
_diffrn_reflns_number             15753
_diffrn_reflns_av_R_equivalents   0.0511
_diffrn_reflns_av_sigmaI/netI     0.0943
_diffrn_reflns_limit_h_min        -15
_diffrn_reflns_limit_h_max        12
_diffrn_reflns_limit_k_min        -17
_diffrn_reflns_limit_k_max        12
_diffrn_reflns_limit_l_min        -24
_diffrn_reflns_limit_l_max        23
_diffrn_reflns_theta_min          1.17
_diffrn_reflns_theta_max          28.29
_reflns_number_total              10748
_reflns_number_gt                 5996
_reflns_threshold_expression      >2sigma(I)
 
_computing_data_collection        ?
_computing_cell_refinement        ?
_computing_data_reduction         ?
_computing_structure_solution     'SHELXS-97 (Sheldrick, 1990)'
_computing_structure_refinement   'SHELXL-97 (Sheldrick, 1997)'
_computing_molecular_graphics     ?
_computing_publication_material   ?
 
_refine_special_details
;
  Refinement of F^2^ against ALL reflections.  The weighted R-factor wR and
  goodness of fit S are based on F^2^, conventional R-factors R are based
  on F, with F set to zero for negative F^2^. The threshold expression of
  F^2^ > 2sigma(F^2^) is used only for calculating R-factors(gt) etc. and is
  not relevant to the choice of reflections for refinement.  R-factors based
  on F^2^ are statistically about twice as large as those based on F, and R-
  factors based on ALL data will be even larger.
;
 
_refine_ls_structure_factor_coef  Fsqd
_refine_ls_matrix_type            full
_refine_ls_weighting_scheme       calc
_refine_ls_weighting_details
  'calc w=1/[\s^2^(Fo^2^)+(0.0583P)^2^+0.0000P] where P=(Fo^2^+2Fc^2^)/3'
_atom_sites_solution_primary      direct
_atom_sites_solution_secondary    difmap
_atom_sites_solution_hydrogens    geom
_refine_ls_hydrogen_treatment     mixed
_refine_ls_extinction_method      none
_refine_ls_extinction_coef        ?
_refine_ls_number_reflns          10748
_refine_ls_number_parameters      645
_refine_ls_number_restraints      0
_refine_ls_R_factor_all           0.1057
_refine_ls_R_factor_gt            0.0545
_refine_ls_wR_factor_ref          0.1464
_refine_ls_wR_factor_gt           0.1061
_refine_ls_goodness_of_fit_ref    0.961
_refine_ls_restrained_S_all       0.961
_refine_ls_shift/su_max           0.002
_refine_ls_shift/su_mean          0.001
 
loop_
  _atom_site_label
  _atom_site_type_symbol
  _atom_site_fract_x
  _atom_site_fract_y
  _atom_site_fract_z
  _atom_site_U_iso_or_equiv
  _atom_site_adp_type
  _atom_site_occupancy
  _atom_site_symmetry_multiplicity
  _atom_site_calc_flag
  _atom_site_refinement_flags
  _atom_site_disorder_assembly
  _atom_site_disorder_group
Mo1 Mo 0.12237(7) 0.81541(7) 0.34571(4) 0.01238(18) Uani 1 1 d . . .
Mo2 Mo 0.35251(8) 0.92698(7) 0.28429(4) 0.01215(18) Uani 1 1 d . . .
Mo3 Mo 0.14364(8) 0.63228(7) 0.23950(5) 0.01407(19) Uani 1 1 d . . .
Mo4 Mo 0.40177(8) 0.60329(7) 0.12196(5) 0.0164(2) Uani 1 1 d . . .
Mo5 Mo 0.57159(8) 0.74099(7) 0.16460(5) 0.01549(19) Uani 1 1 d . . .
Cu1 Cu -0.23206(11) 0.91604(10) 0.37526(6) 0.0162(3) Uani 1 1 d . . .
Cu2 Cu 0.22152(11) 1.14022(10) 0.12325(6) 0.0161(3) Uani 1 1 d . . .
P1 P 0.4228(2) 0.6210(2) 0.30772(13) 0.0121(5) Uani 1 1 d . . .
P2 P 0.2136(2) 0.8789(2) 0.14673(13) 0.0147(5) Uani 1 1 d . . .
O1 O -0.0427(6) 0.9027(5) 0.3314(3) 0.0158(14) Uani 1 1 d . . .
O2 O 0.1402(6) 0.7736(6) 0.4433(3) 0.0191(15) Uani 1 1 d . . .
O3 O 0.1351(6) 0.6682(5) 0.3366(3) 0.0152(14) Uani 1 1 d . . .
O4 O 0.1347(6) 0.8261(5) 0.2109(3) 0.0139(14) Uani 1 1 d . . .
O5 O 0.1793(5) 0.9436(5) 0.3180(3) 0.0143(14) Uani 1 1 d . . .
O6 O 0.3314(5) 0.7457(5) 0.3181(3) 0.0105(13) Uani 1 1 d . . .
O7 O -0.0149(6) 0.6945(6) 0.2138(4) 0.0291(18) Uani 1 1 d . . .
O8 O 0.1743(6) 0.4842(5) 0.2760(4) 0.0199(15) Uani 1 1 d . . .
O9 O 0.2184(6) 0.6437(5) 0.1402(3) 0.0165(14) Uani 1 1 d . . .
O10 O 0.3606(5) 0.5865(5) 0.2539(3) 0.0113(13) Uani 1 1 d . . .
O11 O 0.4598(6) 0.4520(5) 0.1452(4) 0.0210(15) Uani 1 1 d . . .
O12 O 0.3962(7) 0.6491(6) 0.0243(4) 0.0292(18) Uani 1 1 d . . .
O13 O 0.3485(6) 0.7844(5) 0.1364(3) 0.0195(15) Uani 1 1 d . . .
O14 O 0.5645(6) 0.6160(5) 0.1361(3) 0.0191(15) Uani 1 1 d . . .
O15 O 0.5583(7) 0.8462(5) 0.0743(4) 0.0239(16) Uani 1 1 d . . .
O16 O 0.7329(6) 0.6883(6) 0.1841(4) 0.0240(16) Uani 1 1 d . . .
O17 O 0.4880(5) 0.8545(5) 0.2215(3) 0.0130(14) Uani 1 1 d . . .
O18 O 0.5519(6) 0.6240(5) 0.2779(3) 0.0155(14) Uani 1 1 d . . .
O19 O 0.2315(6) 0.9784(5) 0.1673(3) 0.0159(14) Uani 1 1 d . . .
O20 O 0.3246(6) 1.0751(5) 0.2437(3) 0.0162(14) Uani 1 1 d . . .
O21 O 0.4319(6) 0.8900(5) 0.3676(3) 0.0197(15) Uani 1 1 d . . .
O22 O 0.3822(7) 1.0775(6) 0.0673(4) 0.0334(19) Uani 1 1 d . . .
O100 O 0.8714(9) 0.7808(8) 0.0550(5) 0.063(3) Uani 1 1 d . . .
N1 N -0.2974(7) 0.9831(6) 0.2700(4) 0.0146(17) Uani 1 1 d . . .
N2 N -0.3806(7) 1.0670(6) 0.3869(4) 0.0128(16) Uani 1 1 d . . .
N3 N -0.1572(7) 0.8595(7) 0.4794(4) 0.0170(18) Uani 1 1 d . . .
N4 N -0.2094(7) 0.7413(6) 0.4040(4) 0.0167(18) Uani 1 1 d . . .
N5 N 0.2034(8) 1.3094(7) 0.0822(4) 0.0177(18) Uani 1 1 d . . .
N6 N 0.0447(7) 1.2168(7) 0.1641(4) 0.0163(17) Uani 1 1 d . . .
C1 C -0.2452(10) 0.9352(9) 0.2122(6) 0.026(2) Uani 1 1 d . . .
H1 H -0.1806 0.8585 0.2232 0.031 Uiso 1 1 calc R . .
C2 C -0.2856(10) 0.9976(9) 0.1360(6) 0.031(3) Uani 1 1 d . . .
H2 H -0.2502 0.9613 0.0972 0.037 Uiso 1 1 calc R . .
C3 C -0.3782(10) 1.1138(9) 0.1180(6) 0.029(3) Uani 1 1 d . . .
H3 H -0.4033 1.1579 0.0672 0.035 Uiso 1 1 calc R . .
C4 C -0.4324(9) 1.1619(8) 0.1787(6) 0.021(2) Uani 1 1 d . . .
H4 H -0.4953 1.2394 0.1686 0.026 Uiso 1 1 calc R . .
C5 C -0.3944(8) 1.0967(8) 0.2527(5) 0.015(2) Uani 1 1 d . . .
C6 C -0.4453(9) 1.1387(8) 0.3211(5) 0.016(2) Uani 1 1 d . . .
C7 C -0.5531(9) 1.2425(8) 0.3170(5) 0.018(2) Uani 1 1 d . . .
H7 H -0.5960 1.2897 0.2704 0.022 Uiso 1 1 calc R . .
C8 C -0.5968(9) 1.2754(8) 0.3847(5) 0.020(2) Uani 1 1 d . . .
H8 H -0.6698 1.3448 0.3839 0.024 Uiso 1 1 calc R . .
C9 C -0.5314(8) 1.2048(8) 0.4511(6) 0.020(2) Uani 1 1 d . . .
H9 H -0.5577 1.2264 0.4963 0.023 Uiso 1 1 calc R . .
C10 C -0.4246(8) 1.0996(8) 0.4519(6) 0.019(2) Uani 1 1 d . . .
H10 H -0.3823 1.0503 0.4983 0.023 Uiso 1 1 calc R . .
C11 C -0.1247(9) 0.9224(8) 0.5119(5) 0.020(2) Uani 1 1 d . . .
H11 H -0.1366 1.0001 0.4838 0.023 Uiso 1 1 calc R . .
C12 C -0.0742(9) 0.8788(9) 0.5851(6) 0.025(2) Uani 1 1 d . . .
H12 H -0.0536 0.9262 0.6063 0.030 Uiso 1 1 calc R . .
C13 C -0.0548(9) 0.7639(9) 0.6263(6) 0.026(2) Uani 1 1 d . . .
H13 H -0.0232 0.7331 0.6765 0.031 Uiso 1 1 calc R . .
C14 C -0.0822(9) 0.6942(8) 0.5932(5) 0.020(2) Uani 1 1 d . . .
H14 H -0.0661 0.6151 0.6200 0.024 Uiso 1 1 calc R . .
C15 C -0.1348(9) 0.7439(8) 0.5187(5) 0.017(2) Uani 1 1 d . . .
C16 C -0.1647(8) 0.6773(8) 0.4768(5) 0.015(2) Uani 1 1 d . . .
C17 C -0.1518(8) 0.5602(8) 0.5071(5) 0.016(2) Uani 1 1 d . . .
H17 H -0.1246 0.5185 0.5579 0.019 Uiso 1 1 calc R . .
C18 C -0.1795(9) 0.5061(8) 0.4617(5) 0.019(2) Uani 1 1 d . . .
H18 H -0.1712 0.4274 0.4813 0.022 Uiso 1 1 calc R . .
C19 C -0.2194(9) 0.5688(8) 0.3874(6) 0.019(2) Uani 1 1 d . . .
H19 H -0.2352 0.5326 0.3552 0.022 Uiso 1 1 calc R . .
C20 C -0.2359(9) 0.6863(9) 0.3611(6) 0.024(2) Uani 1 1 d . . .
H20 H -0.2668 0.7295 0.3112 0.028 Uiso 1 1 calc R . .
C21 C 0.2869(10) 1.3496(9) 0.0392(5) 0.022(2) Uani 1 1 d . . .
H21 H 0.3627 1.2942 0.0252 0.027 Uiso 1 1 calc R . .
C22 C 0.2697(10) 1.4670(8) 0.0137(5) 0.024(2) Uani 1 1 d . . .
H22 H 0.3327 1.4909 -0.0149 0.028 Uiso 1 1 calc R . .
C23 C 0.1525(10) 1.5494(8) 0.0330(5) 0.019(2) Uani 1 1 d . . .
H23 H 0.1338 1.6307 0.0154 0.023 Uiso 1 1 calc R . .
C24 C 0.0657(9) 1.5082(9) 0.0784(5) 0.021(2) Uani 1 1 d . . .
H24 H -0.0103 1.5616 0.0938 0.025 Uiso 1 1 calc R . .
C26 C 0.0000(9) 1.3380(8) 0.1470(5) 0.017(2) Uani 1 1 d . . .
C27 C -0.1224(9) 1.4041(9) 0.1711(6) 0.026(2) Uani 1 1 d . . .
H27 H -0.1517 1.4865 0.1591 0.031 Uiso 1 1 calc R . .
C28 C -0.2002(10) 1.3470(9) 0.2128(6) 0.031(3) Uani 1 1 d . . .
H28 H -0.2823 1.3903 0.2286 0.037 Uiso 1 1 calc R . .
C29 C -0.1538(9) 1.2258(9) 0.2303(6) 0.027(3) Uani 1 1 d . . .
H29 H -0.2043 1.1856 0.2587 0.033 Uiso 1 1 calc R . .
C30 C -0.0317(10) 1.1626(9) 0.2057(6) 0.026(2) Uani 1 1 d . . .
H30 H -0.0014 1.0800 0.2184 0.031 Uiso 1 1 calc R . .
C31 C 0.4460(9) 0.5146(8) 0.3994(5) 0.017(2) Uani 1 1 d . . .
H31A H 0.3684 0.4983 0.4126 0.020 Uiso 1 1 calc R . .
H31B H 0.5171 0.4409 0.3964 0.020 Uiso 1 1 calc R . .
C32 C 0.4756(8) 0.5527(7) 0.4638(4) 0.0115(19) Uani 1 1 d . . .
H32A H 0.5409 0.5856 0.4465 0.014 Uiso 1 1 calc R . .
H32B H 0.3976 0.6146 0.4757 0.014 Uiso 1 1 calc R . .
C33 C 0.1239(11) 0.9455(10) 0.0572(7) 0.037(3) Uiso 1 1 d . . .
C34 C -0.003(2) 1.033(2) 0.0543(13) 0.038(6) Uiso 0.50 1 d P . .
C35 C 0.085(3) 0.880(3) 0.0243(17) 0.034(8) Uiso 0.50 1 d P . .
C25 C 0.0896(9) 1.3898(8) 0.1011(5) 0.016(3) Uani 1.00(3) 1 d P . .
 
loop_
  _atom_site_aniso_label
  _atom_site_aniso_U_11
  _atom_site_aniso_U_22
  _atom_site_aniso_U_33
  _atom_site_aniso_U_23
  _atom_site_aniso_U_13
  _atom_site_aniso_U_12
Mo1 0.0098(4) 0.0124(4) 0.0111(4) -0.0014(3) 0.0020(3) -0.0026(3)
Mo2 0.0125(4) 0.0147(4) 0.0099(4) -0.0040(3) 0.0005(3) -0.0059(3)
Mo3 0.0107(4) 0.0121(4) 0.0174(4) -0.0027(3) -0.0019(3) -0.0032(3)
Mo4 0.0265(5) 0.0130(4) 0.0101(4) -0.0040(3) 0.0036(3) -0.0087(4)
Mo5 0.0164(4) 0.0157(4) 0.0152(4) -0.0060(3) 0.0071(3) -0.0080(4)
Cu1 0.0146(6) 0.0130(6) 0.0129(6) -0.0003(5) 0.0025(5) -0.0008(5)
Cu2 0.0201(6) 0.0119(6) 0.0140(6) -0.0006(5) -0.0006(5) -0.0063(5)
P1 0.0099(12) 0.0142(13) 0.0089(12) -0.0024(10) 0.0003(9) -0.0024(10)
P2 0.0252(14) 0.0128(13) 0.0061(12) -0.0004(10) -0.0017(10) -0.0088(11)
O1 0.012(3) 0.011(3) 0.017(3) 0.001(3) 0.005(3) -0.001(3)
O2 0.018(4) 0.026(4) 0.015(4) -0.009(3) 0.005(3) -0.010(3)
O3 0.012(3) 0.012(3) 0.016(3) 0.000(3) 0.005(3) -0.005(3)
O4 0.016(3) 0.013(3) 0.012(3) -0.001(3) -0.004(3) -0.005(3)
O5 0.009(3) 0.019(4) 0.012(3) -0.005(3) 0.001(3) -0.003(3)
O6 0.006(3) 0.012(3) 0.009(3) -0.003(3) 0.001(2) 0.001(3)
O7 0.011(4) 0.018(4) 0.063(5) -0.022(4) -0.009(3) -0.001(3)
O8 0.014(4) 0.010(3) 0.027(4) 0.002(3) 0.003(3) -0.002(3)
O9 0.022(4) 0.017(4) 0.011(3) -0.005(3) -0.003(3) -0.007(3)
O10 0.012(3) 0.009(3) 0.012(3) -0.004(3) 0.000(2) -0.003(3)
O11 0.028(4) 0.018(4) 0.019(4) -0.008(3) 0.003(3) -0.010(3)
O12 0.024(5) 0.019(4) 0.013(4) -0.005(3) 0.004(3) -0.013(4)
O13 0.032(4) 0.015(4) 0.015(4) -0.008(3) 0.012(3) -0.014(3)
O14 0.021(4) 0.024(4) 0.016(4) -0.008(3) 0.005(3) -0.012(3)
O15 0.038(4) 0.018(4) 0.017(4) -0.008(3) 0.014(3) -0.014(3)
O16 0.023(4) 0.029(4) 0.029(4) -0.015(3) 0.013(3) -0.017(3)
O17 0.012(3) 0.015(3) 0.009(3) -0.004(3) 0.003(2) -0.004(3)
O18 0.011(3) 0.017(3) 0.016(3) -0.002(3) 0.005(3) -0.006(3)
O19 0.025(4) 0.010(3) 0.014(3) -0.006(3) -0.002(3) -0.006(3)
O20 0.014(3) 0.014(3) 0.020(4) -0.008(3) 0.002(3) -0.004(3)
O21 0.021(4) 0.023(4) 0.021(4) -0.010(3) 0.000(3) -0.011(3)
O22 0.046(5) 0.015(4) 0.024(4) -0.002(3) 0.018(4) -0.005(4)
O100 0.083(7) 0.046(6) 0.059(6) -0.022(5) 0.025(5) -0.027(5)
N1 0.010(4) 0.016(4) 0.010(4) 0.000(3) 0.004(3) -0.002(3)
N2 0.016(4) 0.013(4) 0.011(4) -0.001(3) 0.003(3) -0.009(3)
N3 0.018(4) 0.014(4) 0.014(4) -0.002(3) 0.006(3) -0.004(4)
N4 0.014(4) 0.012(4) 0.016(4) -0.004(3) -0.002(3) 0.003(3)
N5 0.022(5) 0.013(4) 0.016(4) 0.000(3) -0.003(3) -0.007(4)
N6 0.013(4) 0.015(4) 0.015(4) 0.001(3) -0.007(3) -0.003(3)
C1 0.025(6) 0.018(6) 0.024(6) -0.001(5) 0.006(5) -0.003(5)
C2 0.035(7) 0.027(6) 0.022(6) -0.005(5) 0.014(5) -0.011(5)
C3 0.035(7) 0.021(6) 0.024(6) 0.002(5) -0.003(5) -0.009(5)
C4 0.020(5) 0.013(5) 0.026(6) -0.001(4) -0.004(4) -0.003(4)
C5 0.009(5) 0.013(5) 0.025(5) -0.004(4) 0.002(4) -0.010(4)
C6 0.013(5) 0.013(5) 0.025(6) -0.007(4) 0.004(4) -0.010(4)
C7 0.017(5) 0.018(5) 0.023(6) -0.005(4) -0.002(4) -0.011(4)
C8 0.010(5) 0.017(5) 0.026(6) -0.006(4) -0.003(4) 0.001(4)
C9 0.011(5) 0.017(5) 0.030(6) -0.012(5) 0.006(4) -0.002(4)
C10 0.018(5) 0.024(6) 0.026(6) -0.011(5) 0.004(4) -0.006(4)
C11 0.024(6) 0.010(5) 0.023(6) -0.006(4) 0.011(4) -0.007(4)
C12 0.022(6) 0.027(6) 0.027(6) -0.019(5) 0.004(5) -0.002(5)
C13 0.019(6) 0.031(6) 0.020(6) -0.008(5) 0.004(4) -0.003(5)
C14 0.020(5) 0.015(5) 0.014(5) 0.006(4) 0.002(4) -0.004(4)
C15 0.014(5) 0.024(6) 0.010(5) 0.000(4) 0.004(4) -0.008(4)
C16 0.008(5) 0.016(5) 0.017(5) -0.003(4) 0.008(4) -0.005(4)
C17 0.014(5) 0.010(5) 0.016(5) 0.002(4) 0.001(4) -0.002(4)
C18 0.019(5) 0.012(5) 0.020(5) -0.001(4) 0.004(4) -0.006(4)
C19 0.017(5) 0.017(5) 0.025(6) -0.004(4) -0.003(4) -0.010(4)
C20 0.018(5) 0.030(6) 0.028(6) -0.006(5) 0.003(4) -0.006(4)
C21 0.035(6) 0.032(6) 0.015(5) -0.005(4) 0.002(4) -0.017(5)
C22 0.034(6) 0.019(6) 0.020(6) -0.002(4) -0.002(5) -0.015(5)
C23 0.033(6) 0.009(5) 0.011(5) 0.009(4) -0.012(4) -0.010(4)
C24 0.014(5) 0.028(6) 0.024(6) -0.010(5) -0.001(4) -0.008(5)
C26 0.014(5) 0.012(5) 0.021(5) 0.001(4) -0.004(4) -0.005(4)
C27 0.021(6) 0.023(6) 0.030(6) 0.000(5) -0.006(5) -0.011(5)
C28 0.016(6) 0.027(6) 0.039(7) -0.007(5) -0.007(5) 0.000(5)
C29 0.015(5) 0.018(6) 0.032(6) 0.009(5) 0.001(5) -0.003(5)
C30 0.034(7) 0.016(5) 0.026(6) 0.007(4) -0.009(5) -0.015(5)
C31 0.015(5) 0.012(5) 0.016(5) -0.003(4) 0.002(4) -0.001(4)
C32 0.010(4) 0.007(5) 0.007(4) 0.006(4) 0.001(3) 0.001(4)
C25 0.017(6) 0.022(6) 0.016(5) 0.001(4) -0.010(4) -0.006(5)
 
_geom_special_details
;
  All esds (except the esd in the dihedral angle between two l.s. planes)
  are estimated using the full covariance matrix.  The cell esds are taken
  into account individually in the estimation of esds in distances, angles
  and torsion angles; correlations between esds in cell parameters are only
  used when they are defined by crystal symmetry.  An approximate (isotropic)
  treatment of cell esds is used for estimating esds involving l.s. planes.
;
 
loop_
  _geom_bond_atom_site_label_1
  _geom_bond_atom_site_label_2
  _geom_bond_distance
  _geom_bond_site_symmetry_2
  _geom_bond_publ_flag
Mo1 O2 1.707(6) . ?
Mo1 O1 1.737(6) . ?
Mo1 O3 1.898(6) . ?
Mo1 O5 1.914(6) . ?
Mo1 O6 2.211(5) . ?
Mo1 O4 2.417(6) . ?
Mo2 O21 1.699(6) . ?
Mo2 O20 1.719(6) . ?
Mo2 O17 1.896(6) . ?
Mo2 O5 1.925(6) . ?
Mo2 O6 2.325(6) . ?
Mo2 O19 2.445(6) . ?
Mo3 O7 1.692(6) . ?
Mo3 O8 1.706(6) . ?
Mo3 O9 1.896(6) . ?
Mo3 O3 1.955(6) . ?
Mo3 O10 2.303(6) . ?
Mo3 O4 2.344(6) . ?
Mo4 O12 1.698(6) . ?
Mo4 O11 1.702(6) . ?
Mo4 O9 1.932(6) . ?
Mo4 O14 1.969(6) . ?
Mo4 O13 2.249(6) . ?
Mo4 O10 2.359(6) . ?
Mo5 O16 1.704(6) . ?
Mo5 O15 1.753(6) . ?
Mo5 O14 1.874(6) . ?
Mo5 O17 1.920(6) . ?
Mo5 O18 2.196(6) . ?
Mo5 O13 2.434(7) . ?
Cu1 N1 1.944(7) . ?
Cu1 N3 1.973(7) . ?
Cu1 N2 2.030(7) . ?
Cu1 N4 2.053(8) . ?
Cu1 O1 2.150(6) . ?
Cu2 O19 1.943(6) . ?
Cu2 O22 1.963(7) . ?
Cu2 N5 1.997(8) . ?
Cu2 N6 1.999(8) . ?
Cu2 O20 2.362(6) . ?
P1 O18 1.506(6) . ?
P1 O10 1.539(6) . ?
P1 O6 1.567(6) . ?
P1 C31 1.768(9) . ?
P2 O19 1.536(6) . ?
P2 O4 1.542(6) . ?
P2 O13 1.543(7) . ?
P2 C33 1.805(11) . ?
N1 C1 1.343(11) . ?
N1 C5 1.383(11) . ?
N2 C6 1.342(11) . ?
N2 C10 1.353(11) . ?
N3 C11 1.323(11) . ?
N3 C15 1.362(11) . ?
N4 C20 1.339(12) . ?
N4 C16 1.357(11) . ?
N5 C21 1.321(12) . ?
N5 C25 1.363(11) . ?
N6 C30 1.347(12) . ?
N6 C26 1.367(11) . ?
C1 C2 1.395(13) . ?
C2 C3 1.387(13) . ?
C3 C4 1.395(13) . ?
C4 C5 1.361(12) . ?
C5 C6 1.475(12) . ?
C6 C7 1.375(12) . ?
C7 C8 1.402(12) . ?
C8 C9 1.350(12) . ?
C9 C10 1.390(12) . ?
C11 C12 1.375(13) . ?
C12 C13 1.370(14) . ?
C13 C14 1.372(13) . ?
C14 C15 1.401(12) . ?
C15 C16 1.468(13) . ?
C16 C17 1.383(12) . ?
C17 C18 1.373(12) . ?
C18 C19 1.365(12) . ?
C19 C20 1.373(13) . ?
C21 C22 1.370(13) . ?
C22 C23 1.402(13) . ?
C23 C24 1.374(13) . ?
C24 C25 1.363(13) . ?
C26 C27 1.396(13) . ?
C26 C25 1.475(13) . ?
C27 C28 1.383(14) . ?
C28 C29 1.365(14) . ?
C29 C30 1.386(14) . ?
C31 C32 1.530(11) . ?
C32 C32 1.528(15) 2_666 ?
C33 C34 1.40(2) . ?
C33 C35 1.40(3) . ?
C34 C35 1.63(3) 2_575 ?
C34 C35 2.02(4) . ?
C35 C34 1.63(3) 2_575 ?
 
loop_
  _geom_angle_atom_site_label_1
  _geom_angle_atom_site_label_2
  _geom_angle_atom_site_label_3
  _geom_angle
  _geom_angle_site_symmetry_1
  _geom_angle_site_symmetry_3
  _geom_angle_publ_flag
O2 Mo1 O1 103.3(3) . . ?
O2 Mo1 O3 97.9(3) . . ?
O1 Mo1 O3 102.2(3) . . ?
O2 Mo1 O5 99.3(3) . . ?
O1 Mo1 O5 97.1(3) . . ?
O3 Mo1 O5 150.4(2) . . ?
O2 Mo1 O6 96.9(2) . . ?
O1 Mo1 O6 158.2(2) . . ?
O3 Mo1 O6 83.0(2) . . ?
O5 Mo1 O6 71.2(2) . . ?
O2 Mo1 O4 166.2(2) . . ?
O1 Mo1 O4 87.6(2) . . ?
O3 Mo1 O4 71.1(2) . . ?
O5 Mo1 O4 87.6(2) . . ?
O6 Mo1 O4 73.9(2) . . ?
O21 Mo2 O20 103.3(3) . . ?
O21 Mo2 O17 102.4(3) . . ?
O20 Mo2 O17 101.4(3) . . ?
O21 Mo2 O5 103.2(3) . . ?
O20 Mo2 O5 99.2(3) . . ?
O17 Mo2 O5 142.2(3) . . ?
O21 Mo2 O6 92.4(2) . . ?
O20 Mo2 O6 162.1(2) . . ?
O17 Mo2 O6 83.2(2) . . ?
O5 Mo2 O6 68.5(2) . . ?
O21 Mo2 O19 177.8(3) . . ?
O20 Mo2 O19 77.7(2) . . ?
O17 Mo2 O19 79.2(2) . . ?
O5 Mo2 O19 74.6(2) . . ?
O6 Mo2 O19 86.27(19) . . ?
O7 Mo3 O8 103.1(3) . . ?
O7 Mo3 O9 98.9(3) . . ?
O8 Mo3 O9 103.1(3) . . ?
O7 Mo3 O3 101.8(3) . . ?
O8 Mo3 O3 98.4(3) . . ?
O9 Mo3 O3 145.7(3) . . ?
O7 Mo3 O10 166.8(3) . . ?
O8 Mo3 O10 89.1(3) . . ?
O9 Mo3 O10 73.0(2) . . ?
O3 Mo3 O10 81.1(2) . . ?
O7 Mo3 O4 87.6(3) . . ?
O8 Mo3 O4 167.1(3) . . ?
O9 Mo3 O4 82.0(2) . . ?
O3 Mo3 O4 72.0(2) . . ?
O10 Mo3 O4 81.0(2) . . ?
O12 Mo4 O11 104.3(3) . . ?
O12 Mo4 O9 97.9(3) . . ?
O11 Mo4 O9 101.2(3) . . ?
O12 Mo4 O14 98.4(3) . . ?
O11 Mo4 O14 97.9(3) . . ?
O9 Mo4 O14 150.9(2) . . ?
O12 Mo4 O13 96.0(3) . . ?
O11 Mo4 O13 158.8(3) . . ?
O9 Mo4 O13 81.8(2) . . ?
O14 Mo4 O13 72.7(2) . . ?
O12 Mo4 O10 164.9(3) . . ?
O11 Mo4 O10 88.2(2) . . ?
O9 Mo4 O10 71.1(2) . . ?
O14 Mo4 O10 87.8(2) . . ?
O13 Mo4 O10 72.7(2) . . ?
O16 Mo5 O15 101.5(3) . . ?
O16 Mo5 O14 101.3(3) . . ?
O15 Mo5 O14 100.7(3) . . ?
O16 Mo5 O17 104.9(3) . . ?
O15 Mo5 O17 96.2(3) . . ?
O14 Mo5 O17 145.2(3) . . ?
O16 Mo5 O18 88.0(3) . . ?
O15 Mo5 O18 170.2(3) . . ?
O14 Mo5 O18 79.5(2) . . ?
O17 Mo5 O18 78.9(2) . . ?
O16 Mo5 O13 170.9(3) . . ?
O15 Mo5 O13 82.5(3) . . ?
O14 Mo5 O13 69.9(2) . . ?
O17 Mo5 O13 82.5(2) . . ?
O18 Mo5 O13 88.4(2) . . ?
N1 Cu1 N3 174.2(3) . . ?
N1 Cu1 N2 81.6(3) . . ?
N3 Cu1 N2 97.2(3) . . ?
N1 Cu1 N4 104.1(3) . . ?
N3 Cu1 N4 80.9(3) . . ?
N2 Cu1 N4 133.2(3) . . ?
N1 Cu1 O1 88.9(3) . . ?
N3 Cu1 O1 87.2(3) . . ?
N2 Cu1 O1 125.7(3) . . ?
N4 Cu1 O1 101.0(3) . . ?
O19 Cu2 O22 88.7(3) . . ?
O19 Cu2 N5 176.7(3) . . ?
O22 Cu2 N5 94.5(3) . . ?
O19 Cu2 N6 94.9(3) . . ?
O22 Cu2 N6 171.1(3) . . ?
N5 Cu2 N6 82.0(3) . . ?
O19 Cu2 O20 76.1(2) . . ?
O22 Cu2 O20 95.2(3) . . ?
N5 Cu2 O20 103.0(3) . . ?
N6 Cu2 O20 93.6(2) . . ?
O18 P1 O10 111.6(3) . . ?
O18 P1 O6 109.0(3) . . ?
O10 P1 O6 111.0(3) . . ?
O18 P1 C31 109.0(4) . . ?
O10 P1 C31 108.6(4) . . ?
O6 P1 C31 107.6(4) . . ?
O19 P2 O4 108.7(3) . . ?
O19 P2 O13 108.9(4) . . ?
O4 P2 O13 112.3(3) . . ?
O19 P2 C33 107.6(4) . . ?
O4 P2 C33 109.5(5) . . ?
O13 P2 C33 109.8(4) . . ?
Mo1 O1 Cu1 143.7(3) . . ?
Mo1 O3 Mo3 125.1(3) . . ?
P2 O4 Mo3 124.3(3) . . ?
P2 O4 Mo1 128.7(3) . . ?
Mo3 O4 Mo1 91.8(2) . . ?
Mo1 O5 Mo2 123.7(3) . . ?
P1 O6 Mo1 129.8(3) . . ?
P1 O6 Mo2 132.4(3) . . ?
Mo1 O6 Mo2 96.5(2) . . ?
Mo3 O9 Mo4 123.3(3) . . ?
P1 O10 Mo3 127.9(3) . . ?
P1 O10 Mo4 127.9(3) . . ?
Mo3 O10 Mo4 92.5(2) . . ?
P2 O13 Mo4 129.5(4) . . ?
P2 O13 Mo5 135.7(3) . . ?
Mo4 O13 Mo5 92.7(2) . . ?
Mo5 O14 Mo4 123.9(3) . . ?
Mo2 O17 Mo5 152.2(4) . . ?
P1 O18 Mo5 122.1(3) . . ?
P2 O19 Cu2 142.0(4) . . ?
P2 O19 Mo2 118.7(3) . . ?
Cu2 O19 Mo2 97.8(2) . . ?
Mo2 O20 Cu2 108.0(3) . . ?
C1 N1 C5 118.4(8) . . ?
C1 N1 Cu1 125.4(6) . . ?
C5 N1 Cu1 115.6(6) . . ?
C6 N2 C10 117.8(8) . . ?
C6 N2 Cu1 113.7(6) . . ?
C10 N2 Cu1 128.5(6) . . ?
C11 N3 C15 118.8(8) . . ?
C11 N3 Cu1 125.8(6) . . ?
C15 N3 Cu1 115.3(6) . . ?
C20 N4 C16 117.9(8) . . ?
C20 N4 Cu1 128.2(6) . . ?
C16 N4 Cu1 113.8(6) . . ?
C21 N5 C25 118.4(8) . . ?
C21 N5 Cu2 127.4(7) . . ?
C25 N5 Cu2 114.2(6) . . ?
C30 N6 C26 118.3(8) . . ?
C30 N6 Cu2 127.5(7) . . ?
C26 N6 Cu2 114.2(6) . . ?
N1 C1 C2 121.7(9) . . ?
C3 C2 C1 120.1(9) . . ?
C2 C3 C4 117.5(9) . . ?
C5 C4 C3 120.8(9) . . ?
C4 C5 N1 121.4(8) . . ?
C4 C5 C6 125.2(8) . . ?
N1 C5 C6 113.3(8) . . ?
N2 C6 C7 123.1(9) . . ?
N2 C6 C5 115.1(8) . . ?
C7 C6 C5 121.8(9) . . ?
C6 C7 C8 118.5(9) . . ?
C9 C8 C7 119.0(9) . . ?
C8 C9 C10 119.9(9) . . ?
N2 C10 C9 121.8(9) . . ?
N3 C11 C12 123.3(9) . . ?
C13 C12 C11 118.4(10) . . ?
C12 C13 C14 119.9(9) . . ?
C13 C14 C15 119.0(9) . . ?
N3 C15 C14 120.4(9) . . ?
N3 C15 C16 115.7(8) . . ?
C14 C15 C16 123.9(9) . . ?
N4 C16 C17 121.3(9) . . ?
N4 C16 C15 114.1(8) . . ?
C17 C16 C15 124.6(8) . . ?
C18 C17 C16 119.4(9) . . ?
C17 C18 C19 119.4(9) . . ?
C18 C19 C20 118.9(9) . . ?
N4 C20 C19 123.0(9) . . ?
N5 C21 C22 124.7(10) . . ?
C21 C22 C23 116.7(10) . . ?
C24 C23 C22 118.9(9) . . ?
C23 C24 C25 120.8(9) . . ?
N6 C26 C27 120.8(9) . . ?
N6 C26 C25 114.7(8) . . ?
C27 C26 C25 124.5(9) . . ?
C28 C27 C26 120.0(10) . . ?
C29 C28 C27 118.6(10) . . ?
C28 C29 C30 120.0(10) . . ?
N6 C30 C29 122.2(9) . . ?
C32 C31 P1 114.3(6) . . ?
C32 C32 C31 111.1(9) 2_666 . ?
C34 C33 C35 92.3(16) . . ?
C34 C33 P2 119.0(12) . . ?
C35 C33 P2 122.2(14) . . ?
C33 C34 C35 124.9(19) . 2_575 ?
C33 C34 C35 43.7(11) . . ?
C35 C34 C35 99.5(16) 2_575 . ?
C33 C35 C34 110(2) . 2_575 ?
C33 C35 C34 44.0(11) . . ?
C34 C35 C34 80.5(16) 2_575 . ?
N5 C25 C24 120.4(9) . . ?
N5 C25 C26 115.0(8) . . ?
C24 C25 C26 124.6(9) . . ?
 
_diffrn_measured_fraction_theta_max    0.940
_diffrn_reflns_theta_full              28.29
_diffrn_measured_fraction_theta_full   0.940
_refine_diff_density_max    1.454
_refine_diff_density_min   -1.266
_refine_diff_density_rms    0.054

#===END

data_p-1
 
_audit_creation_method            SHELXL-97
_chemical_name_systematic
;
  ?
;
_chemical_name_common             ?
_chemical_melting_point           ?
_chemical_formula_moiety          ?
_chemical_formula_sum
  'C34 H18 Cu2 Mo5 N6 O23 P2'
_chemical_formula_weight          1547.26
 
loop_
  _atom_type_symbol
  _atom_type_description
  _atom_type_scat_dispersion_real
  _atom_type_scat_dispersion_imag
  _atom_type_scat_source
  'C'  'C'   0.0033   0.0016
  'International Tables Vol C Tables 4.2.6.8 and 6.1.1.4'
  'H'  'H'   0.0000   0.0000
  'International Tables Vol C Tables 4.2.6.8 and 6.1.1.4'
  'N'  'N'   0.0061   0.0033
  'International Tables Vol C Tables 4.2.6.8 and 6.1.1.4'
  'O'  'O'   0.0106   0.0060
  'International Tables Vol C Tables 4.2.6.8 and 6.1.1.4'
  'P'  'P'   0.1023   0.0942
  'International Tables Vol C Tables 4.2.6.8 and 6.1.1.4'
  'Cu'  'Cu'   0.3201   1.2651
  'International Tables Vol C Tables 4.2.6.8 and 6.1.1.4'
  'Mo'  'Mo'  -1.6832   0.6857
  'International Tables Vol C Tables 4.2.6.8 and 6.1.1.4'
 
_symmetry_cell_setting            Triclinic
_symmetry_space_group_name_H-M    P-1
 
loop_
  _symmetry_equiv_pos_as_xyz
  'x, y, z'
  '-x, -y, -z'
 
_cell_length_a                    11.3132(6)
_cell_length_b                    12.8735(7)
_cell_length_c                    18.2974(10)
_cell_angle_alpha                 71.6900(10)
_cell_angle_beta                  82.9100(10)
_cell_angle_gamma                 65.5800(10)
_cell_volume                      2303.5(2)
_cell_formula_units_Z             2
_cell_measurement_temperature     293(2)
_cell_measurement_reflns_used     ?
_cell_measurement_theta_min       ?
_cell_measurement_theta_max       ?
 
_exptl_crystal_description        Block
_exptl_crystal_colour             Blue
_exptl_crystal_size_max           0.23
_exptl_crystal_size_mid           0.17
_exptl_crystal_size_min           0.13
_exptl_crystal_density_meas       ?
_exptl_crystal_density_diffrn     2.231
_exptl_crystal_density_method     'not measured'
_exptl_crystal_F_000              1492
_exptl_absorpt_coefficient_mu     2.383
_exptl_absorpt_correction_type    SADABS
_exptl_absorpt_correction_T_min   ?
_exptl_absorpt_correction_T_max   ?
_exptl_absorpt_process_details    ?
 
_exptl_special_details
;
  ?
;
 
_diffrn_ambient_temperature       293(2)
_diffrn_radiation_wavelength      0.71073
_diffrn_radiation_type            MoK\a
_diffrn_radiation_source          'fine-focus sealed tube'
_diffrn_radiation_monochromator   graphite
_diffrn_measurement_device_type   ?
_diffrn_measurement_method        ?
_diffrn_detector_area_resol_mean  ?
_diffrn_standards_number          ?
_diffrn_standards_interval_count  ?
_diffrn_standards_interval_time   ?
_diffrn_standards_decay_%         ?
_diffrn_reflns_number             15753
_diffrn_reflns_av_R_equivalents   0.0511
_diffrn_reflns_av_sigmaI/netI     0.0943
_diffrn_reflns_limit_h_min        -15
_diffrn_reflns_limit_h_max        12
_diffrn_reflns_limit_k_min        -17
_diffrn_reflns_limit_k_max        12
_diffrn_reflns_limit_l_min        -24
_diffrn_reflns_limit_l_max        23
_diffrn_reflns_theta_min          1.17
_diffrn_reflns_theta_max          28.29
_reflns_number_total              10748
_reflns_number_gt                 5996
_reflns_threshold_expression      >2sigma(I)
 
_computing_data_collection        ?
_computing_cell_refinement        ?
_computing_data_reduction         ?
_computing_structure_solution     'SHELXS-97 (Sheldrick, 1990)'
_computing_structure_refinement   'SHELXL-97 (Sheldrick, 1997)'
_computing_molecular_graphics     ?
_computing_publication_material   ?
 
_refine_special_details
;
  Refinement of F^2^ against ALL reflections.  The weighted R-factor wR and
  goodness of fit S are based on F^2^, conventional R-factors R are based
  on F, with F set to zero for negative F^2^. The threshold expression of
  F^2^ > 2sigma(F^2^) is used only for calculating R-factors(gt) etc. and is
  not relevant to the choice of reflections for refinement.  R-factors based
  on F^2^ are statistically about twice as large as those based on F, and R-
  factors based on ALL data will be even larger.
;
 
_refine_ls_structure_factor_coef  Fsqd
_refine_ls_matrix_type            full
_refine_ls_weighting_scheme       calc
_refine_ls_weighting_details
  'calc w=1/[\s^2^(Fo^2^)+(0.0583P)^2^+0.0000P] where P=(Fo^2^+2Fc^2^)/3'
_atom_sites_solution_primary      direct
_atom_sites_solution_secondary    difmap
_atom_sites_solution_hydrogens    geom
_refine_ls_hydrogen_treatment     mixed
_refine_ls_extinction_method      none
_refine_ls_extinction_coef        ?
_refine_ls_number_reflns          10748
_refine_ls_number_parameters      645
_refine_ls_number_restraints      0
_refine_ls_R_factor_all           0.1057
_refine_ls_R_factor_gt            0.0545
_refine_ls_wR_factor_ref          0.1464
_refine_ls_wR_factor_gt           0.1061
_refine_ls_goodness_of_fit_ref    0.961
_refine_ls_restrained_S_all       0.961
_refine_ls_shift/su_max           0.002
_refine_ls_shift/su_mean          0.001
 
loop_
  _atom_site_label
  _atom_site_type_symbol
  _atom_site_fract_x
  _atom_site_fract_y
  _atom_site_fract_z
  _atom_site_U_iso_or_equiv
  _atom_site_adp_type
  _atom_site_occupancy
  _atom_site_symmetry_multiplicity
  _atom_site_calc_flag
  _atom_site_refinement_flags
  _atom_site_disorder_assembly
  _atom_site_disorder_group
Mo1 Mo 0.12237(7) 0.81541(7) 0.34571(4) 0.01238(18) Uani 1 1 d . . .
Mo2 Mo 0.35251(8) 0.92698(7) 0.28429(4) 0.01215(18) Uani 1 1 d . . .
Mo3 Mo 0.14364(8) 0.63228(7) 0.23950(5) 0.01407(19) Uani 1 1 d . . .
Mo4 Mo 0.40177(8) 0.60329(7) 0.12196(5) 0.0164(2) Uani 1 1 d . . .
Mo5 Mo 0.57159(8) 0.74099(7) 0.16460(5) 0.01549(19) Uani 1 1 d . . .
Cu1 Cu -0.23206(11) 0.91604(10) 0.37526(6) 0.0162(3) Uani 1 1 d . . .
Cu2 Cu 0.22152(11) 1.14022(10) 0.12325(6) 0.0161(3) Uani 1 1 d . . .
P1 P 0.4228(2) 0.6210(2) 0.30772(13) 0.0121(5) Uani 1 1 d . . .
P2 P 0.2136(2) 0.8789(2) 0.14673(13) 0.0147(5) Uani 1 1 d . . .
O1 O -0.0427(6) 0.9027(5) 0.3314(3) 0.0158(14) Uani 1 1 d . . .
O2 O 0.1402(6) 0.7736(6) 0.4433(3) 0.0191(15) Uani 1 1 d . . .
O3 O 0.1351(6) 0.6682(5) 0.3366(3) 0.0152(14) Uani 1 1 d . . .
O4 O 0.1347(6) 0.8261(5) 0.2109(3) 0.0139(14) Uani 1 1 d . . .
O5 O 0.1793(5) 0.9436(5) 0.3180(3) 0.0143(14) Uani 1 1 d . . .
O6 O 0.3314(5) 0.7457(5) 0.3181(3) 0.0105(13) Uani 1 1 d . . .
O7 O -0.0149(6) 0.6945(6) 0.2138(4) 0.0291(18) Uani 1 1 d . . .
O8 O 0.1743(6) 0.4842(5) 0.2760(4) 0.0199(15) Uani 1 1 d . . .
O9 O 0.2184(6) 0.6437(5) 0.1402(3) 0.0165(14) Uani 1 1 d . . .
O10 O 0.3606(5) 0.5865(5) 0.2539(3) 0.0113(13) Uani 1 1 d . . .
O11 O 0.4598(6) 0.4520(5) 0.1452(4) 0.0210(15) Uani 1 1 d . . .
O12 O 0.3962(7) 0.6491(6) 0.0243(4) 0.0292(18) Uani 1 1 d . . .
O13 O 0.3485(6) 0.7844(5) 0.1364(3) 0.0195(15) Uani 1 1 d . . .
O14 O 0.5645(6) 0.6160(5) 0.1361(3) 0.0191(15) Uani 1 1 d . . .
O15 O 0.5583(7) 0.8462(5) 0.0743(4) 0.0239(16) Uani 1 1 d . . .
O16 O 0.7329(6) 0.6883(6) 0.1841(4) 0.0240(16) Uani 1 1 d . . .
O17 O 0.4880(5) 0.8545(5) 0.2215(3) 0.0130(14) Uani 1 1 d . . .
O18 O 0.5519(6) 0.6240(5) 0.2779(3) 0.0155(14) Uani 1 1 d . . .
O19 O 0.2315(6) 0.9784(5) 0.1673(3) 0.0159(14) Uani 1 1 d . . .
O20 O 0.3246(6) 1.0751(5) 0.2437(3) 0.0162(14) Uani 1 1 d . . .
O21 O 0.4319(6) 0.8900(5) 0.3676(3) 0.0197(15) Uani 1 1 d . . .
O22 O 0.3822(7) 1.0775(6) 0.0673(4) 0.0334(19) Uani 1 1 d . . .
O100 O 0.8714(9) 0.7808(8) 0.0550(5) 0.063(3) Uani 1 1 d . . .
N1 N -0.2974(7) 0.9831(6) 0.2700(4) 0.0146(17) Uani 1 1 d . . .
N2 N -0.3806(7) 1.0670(6) 0.3869(4) 0.0128(16) Uani 1 1 d . . .
N3 N -0.1572(7) 0.8595(7) 0.4794(4) 0.0170(18) Uani 1 1 d . . .
N4 N -0.2094(7) 0.7413(6) 0.4040(4) 0.0167(18) Uani 1 1 d . . .
N5 N 0.2034(8) 1.3094(7) 0.0822(4) 0.0177(18) Uani 1 1 d . . .
N6 N 0.0447(7) 1.2168(7) 0.1641(4) 0.0163(17) Uani 1 1 d . . .
C1 C -0.2452(10) 0.9352(9) 0.2122(6) 0.026(2) Uani 1 1 d . . .
H1 H -0.1806 0.8585 0.2232 0.031 Uiso 1 1 calc R . .
C2 C -0.2856(10) 0.9976(9) 0.1360(6) 0.031(3) Uani 1 1 d . . .
H2 H -0.2502 0.9613 0.0972 0.037 Uiso 1 1 calc R . .
C3 C -0.3782(10) 1.1138(9) 0.1180(6) 0.029(3) Uani 1 1 d . . .
H3 H -0.4033 1.1579 0.0672 0.035 Uiso 1 1 calc R . .
C4 C -0.4324(9) 1.1619(8) 0.1787(6) 0.021(2) Uani 1 1 d . . .
H4 H -0.4953 1.2394 0.1686 0.026 Uiso 1 1 calc R . .
C5 C -0.3944(8) 1.0967(8) 0.2527(5) 0.015(2) Uani 1 1 d . . .
C6 C -0.4453(9) 1.1387(8) 0.3211(5) 0.016(2) Uani 1 1 d . . .
C7 C -0.5531(9) 1.2425(8) 0.3170(5) 0.018(2) Uani 1 1 d . . .
H7 H -0.5960 1.2897 0.2704 0.022 Uiso 1 1 calc R . .
C8 C -0.5968(9) 1.2754(8) 0.3847(5) 0.020(2) Uani 1 1 d . . .
H8 H -0.6698 1.3448 0.3839 0.024 Uiso 1 1 calc R . .
C9 C -0.5314(8) 1.2048(8) 0.4511(6) 0.020(2) Uani 1 1 d . . .
H9 H -0.5577 1.2264 0.4963 0.023 Uiso 1 1 calc R . .
C10 C -0.4246(8) 1.0996(8) 0.4519(6) 0.019(2) Uani 1 1 d . . .
H10 H -0.3823 1.0503 0.4983 0.023 Uiso 1 1 calc R . .
C11 C -0.1247(9) 0.9224(8) 0.5119(5) 0.020(2) Uani 1 1 d . . .
H11 H -0.1366 1.0001 0.4838 0.023 Uiso 1 1 calc R . .
C12 C -0.0742(9) 0.8788(9) 0.5851(6) 0.025(2) Uani 1 1 d . . .
H12 H -0.0536 0.9262 0.6063 0.030 Uiso 1 1 calc R . .
C13 C -0.0548(9) 0.7639(9) 0.6263(6) 0.026(2) Uani 1 1 d . . .
H13 H -0.0232 0.7331 0.6765 0.031 Uiso 1 1 calc R . .
C14 C -0.0822(9) 0.6942(8) 0.5932(5) 0.020(2) Uani 1 1 d . . .
H14 H -0.0661 0.6151 0.6200 0.024 Uiso 1 1 calc R . .
C15 C -0.1348(9) 0.7439(8) 0.5187(5) 0.017(2) Uani 1 1 d . . .
C16 C -0.1647(8) 0.6773(8) 0.4768(5) 0.015(2) Uani 1 1 d . . .
C17 C -0.1518(8) 0.5602(8) 0.5071(5) 0.016(2) Uani 1 1 d . . .
H17 H -0.1246 0.5185 0.5579 0.019 Uiso 1 1 calc R . .
C18 C -0.1795(9) 0.5061(8) 0.4617(5) 0.019(2) Uani 1 1 d . . .
H18 H -0.1712 0.4274 0.4813 0.022 Uiso 1 1 calc R . .
C19 C -0.2194(9) 0.5688(8) 0.3874(6) 0.019(2) Uani 1 1 d . . .
H19 H -0.2352 0.5326 0.3552 0.022 Uiso 1 1 calc R . .
C20 C -0.2359(9) 0.6863(9) 0.3611(6) 0.024(2) Uani 1 1 d . . .
H20 H -0.2668 0.7295 0.3112 0.028 Uiso 1 1 calc R . .
C21 C 0.2869(10) 1.3496(9) 0.0392(5) 0.022(2) Uani 1 1 d . . .
H21 H 0.3627 1.2942 0.0252 0.027 Uiso 1 1 calc R . .
C22 C 0.2697(10) 1.4670(8) 0.0137(5) 0.024(2) Uani 1 1 d . . .
H22 H 0.3327 1.4909 -0.0149 0.028 Uiso 1 1 calc R . .
C23 C 0.1525(10) 1.5494(8) 0.0330(5) 0.019(2) Uani 1 1 d . . .
H23 H 0.1338 1.6307 0.0154 0.023 Uiso 1 1 calc R . .
C24 C 0.0657(9) 1.5082(9) 0.0784(5) 0.021(2) Uani 1 1 d . . .
H24 H -0.0103 1.5616 0.0938 0.025 Uiso 1 1 calc R . .
C26 C 0.0000(9) 1.3380(8) 0.1470(5) 0.017(2) Uani 1 1 d . . .
C27 C -0.1224(9) 1.4041(9) 0.1711(6) 0.026(2) Uani 1 1 d . . .
H27 H -0.1517 1.4865 0.1591 0.031 Uiso 1 1 calc R . .
C28 C -0.2002(10) 1.3470(9) 0.2128(6) 0.031(3) Uani 1 1 d . . .
H28 H -0.2823 1.3903 0.2286 0.037 Uiso 1 1 calc R . .
C29 C -0.1538(9) 1.2258(9) 0.2303(6) 0.027(3) Uani 1 1 d . . .
H29 H -0.2043 1.1856 0.2587 0.033 Uiso 1 1 calc R . .
C30 C -0.0317(10) 1.1626(9) 0.2057(6) 0.026(2) Uani 1 1 d . . .
H30 H -0.0014 1.0800 0.2184 0.031 Uiso 1 1 calc R . .
C31 C 0.4460(9) 0.5146(8) 0.3994(5) 0.017(2) Uani 1 1 d . . .
H31A H 0.3684 0.4983 0.4126 0.020 Uiso 1 1 calc R . .
H31B H 0.5171 0.4409 0.3964 0.020 Uiso 1 1 calc R . .
C32 C 0.4756(8) 0.5527(7) 0.4638(4) 0.0115(19) Uani 1 1 d . . .
H32A H 0.5409 0.5856 0.4465 0.014 Uiso 1 1 calc R . .
H32B H 0.3976 0.6146 0.4757 0.014 Uiso 1 1 calc R . .
C33 C 0.1239(11) 0.9455(10) 0.0572(7) 0.037(3) Uiso 1 1 d . . .
C34 C -0.003(2) 1.033(2) 0.0543(13) 0.038(6) Uiso 0.50 1 d P . .
C35 C 0.085(3) 0.880(3) 0.0243(17) 0.034(8) Uiso 0.50 1 d P . .
C25 C 0.0896(9) 1.3898(8) 0.1011(5) 0.016(3) Uani 1.00(3) 1 d P . .
 
loop_
  _atom_site_aniso_label
  _atom_site_aniso_U_11
  _atom_site_aniso_U_22
  _atom_site_aniso_U_33
  _atom_site_aniso_U_23
  _atom_site_aniso_U_13
  _atom_site_aniso_U_12
Mo1 0.0098(4) 0.0124(4) 0.0111(4) -0.0014(3) 0.0020(3) -0.0026(3)
Mo2 0.0125(4) 0.0147(4) 0.0099(4) -0.0040(3) 0.0005(3) -0.0059(3)
Mo3 0.0107(4) 0.0121(4) 0.0174(4) -0.0027(3) -0.0019(3) -0.0032(3)
Mo4 0.0265(5) 0.0130(4) 0.0101(4) -0.0040(3) 0.0036(3) -0.0087(4)
Mo5 0.0164(4) 0.0157(4) 0.0152(4) -0.0060(3) 0.0071(3) -0.0080(4)
Cu1 0.0146(6) 0.0130(6) 0.0129(6) -0.0003(5) 0.0025(5) -0.0008(5)
Cu2 0.0201(6) 0.0119(6) 0.0140(6) -0.0006(5) -0.0006(5) -0.0063(5)
P1 0.0099(12) 0.0142(13) 0.0089(12) -0.0024(10) 0.0003(9) -0.0024(10)
P2 0.0252(14) 0.0128(13) 0.0061(12) -0.0004(10) -0.0017(10) -0.0088(11)
O1 0.012(3) 0.011(3) 0.017(3) 0.001(3) 0.005(3) -0.001(3)
O2 0.018(4) 0.026(4) 0.015(4) -0.009(3) 0.005(3) -0.010(3)
O3 0.012(3) 0.012(3) 0.016(3) 0.000(3) 0.005(3) -0.005(3)
O4 0.016(3) 0.013(3) 0.012(3) -0.001(3) -0.004(3) -0.005(3)
O5 0.009(3) 0.019(4) 0.012(3) -0.005(3) 0.001(3) -0.003(3)
O6 0.006(3) 0.012(3) 0.009(3) -0.003(3) 0.001(2) 0.001(3)
O7 0.011(4) 0.018(4) 0.063(5) -0.022(4) -0.009(3) -0.001(3)
O8 0.014(4) 0.010(3) 0.027(4) 0.002(3) 0.003(3) -0.002(3)
O9 0.022(4) 0.017(4) 0.011(3) -0.005(3) -0.003(3) -0.007(3)
O10 0.012(3) 0.009(3) 0.012(3) -0.004(3) 0.000(2) -0.003(3)
O11 0.028(4) 0.018(4) 0.019(4) -0.008(3) 0.003(3) -0.010(3)
O12 0.024(5) 0.019(4) 0.013(4) -0.005(3) 0.004(3) -0.013(4)
O13 0.032(4) 0.015(4) 0.015(4) -0.008(3) 0.012(3) -0.014(3)
O14 0.021(4) 0.024(4) 0.016(4) -0.008(3) 0.005(3) -0.012(3)
O15 0.038(4) 0.018(4) 0.017(4) -0.008(3) 0.014(3) -0.014(3)
O16 0.023(4) 0.029(4) 0.029(4) -0.015(3) 0.013(3) -0.017(3)
O17 0.012(3) 0.015(3) 0.009(3) -0.004(3) 0.003(2) -0.004(3)
O18 0.011(3) 0.017(3) 0.016(3) -0.002(3) 0.005(3) -0.006(3)
O19 0.025(4) 0.010(3) 0.014(3) -0.006(3) -0.002(3) -0.006(3)
O20 0.014(3) 0.014(3) 0.020(4) -0.008(3) 0.002(3) -0.004(3)
O21 0.021(4) 0.023(4) 0.021(4) -0.010(3) 0.000(3) -0.011(3)
O22 0.046(5) 0.015(4) 0.024(4) -0.002(3) 0.018(4) -0.005(4)
O100 0.083(7) 0.046(6) 0.059(6) -0.022(5) 0.025(5) -0.027(5)
N1 0.010(4) 0.016(4) 0.010(4) 0.000(3) 0.004(3) -0.002(3)
N2 0.016(4) 0.013(4) 0.011(4) -0.001(3) 0.003(3) -0.009(3)
N3 0.018(4) 0.014(4) 0.014(4) -0.002(3) 0.006(3) -0.004(4)
N4 0.014(4) 0.012(4) 0.016(4) -0.004(3) -0.002(3) 0.003(3)
N5 0.022(5) 0.013(4) 0.016(4) 0.000(3) -0.003(3) -0.007(4)
N6 0.013(4) 0.015(4) 0.015(4) 0.001(3) -0.007(3) -0.003(3)
C1 0.025(6) 0.018(6) 0.024(6) -0.001(5) 0.006(5) -0.003(5)
C2 0.035(7) 0.027(6) 0.022(6) -0.005(5) 0.014(5) -0.011(5)
C3 0.035(7) 0.021(6) 0.024(6) 0.002(5) -0.003(5) -0.009(5)
C4 0.020(5) 0.013(5) 0.026(6) -0.001(4) -0.004(4) -0.003(4)
C5 0.009(5) 0.013(5) 0.025(5) -0.004(4) 0.002(4) -0.010(4)
C6 0.013(5) 0.013(5) 0.025(6) -0.007(4) 0.004(4) -0.010(4)
C7 0.017(5) 0.018(5) 0.023(6) -0.005(4) -0.002(4) -0.011(4)
C8 0.010(5) 0.017(5) 0.026(6) -0.006(4) -0.003(4) 0.001(4)
C9 0.011(5) 0.017(5) 0.030(6) -0.012(5) 0.006(4) -0.002(4)
C10 0.018(5) 0.024(6) 0.026(6) -0.011(5) 0.004(4) -0.006(4)
C11 0.024(6) 0.010(5) 0.023(6) -0.006(4) 0.011(4) -0.007(4)
C12 0.022(6) 0.027(6) 0.027(6) -0.019(5) 0.004(5) -0.002(5)
C13 0.019(6) 0.031(6) 0.020(6) -0.008(5) 0.004(4) -0.003(5)
C14 0.020(5) 0.015(5) 0.014(5) 0.006(4) 0.002(4) -0.004(4)
C15 0.014(5) 0.024(6) 0.010(5) 0.000(4) 0.004(4) -0.008(4)
C16 0.008(5) 0.016(5) 0.017(5) -0.003(4) 0.008(4) -0.005(4)
C17 0.014(5) 0.010(5) 0.016(5) 0.002(4) 0.001(4) -0.002(4)
C18 0.019(5) 0.012(5) 0.020(5) -0.001(4) 0.004(4) -0.006(4)
C19 0.017(5) 0.017(5) 0.025(6) -0.004(4) -0.003(4) -0.010(4)
C20 0.018(5) 0.030(6) 0.028(6) -0.006(5) 0.003(4) -0.006(4)
C21 0.035(6) 0.032(6) 0.015(5) -0.005(4) 0.002(4) -0.017(5)
C22 0.034(6) 0.019(6) 0.020(6) -0.002(4) -0.002(5) -0.015(5)
C23 0.033(6) 0.009(5) 0.011(5) 0.009(4) -0.012(4) -0.010(4)
C24 0.014(5) 0.028(6) 0.024(6) -0.010(5) -0.001(4) -0.008(5)
C26 0.014(5) 0.012(5) 0.021(5) 0.001(4) -0.004(4) -0.005(4)
C27 0.021(6) 0.023(6) 0.030(6) 0.000(5) -0.006(5) -0.011(5)
C28 0.016(6) 0.027(6) 0.039(7) -0.007(5) -0.007(5) 0.000(5)
C29 0.015(5) 0.018(6) 0.032(6) 0.009(5) 0.001(5) -0.003(5)
C30 0.034(7) 0.016(5) 0.026(6) 0.007(4) -0.009(5) -0.015(5)
C31 0.015(5) 0.012(5) 0.016(5) -0.003(4) 0.002(4) -0.001(4)
C32 0.010(4) 0.007(5) 0.007(4) 0.006(4) 0.001(3) 0.001(4)
C25 0.017(6) 0.022(6) 0.016(5) 0.001(4) -0.010(4) -0.006(5)
 
_geom_special_details
;
  All esds (except the esd in the dihedral angle between two l.s. planes)
  are estimated using the full covariance matrix.  The cell esds are taken
  into account individually in the estimation of esds in distances, angles
  and torsion angles; correlations between esds in cell parameters are only
  used when they are defined by crystal symmetry.  An approximate (isotropic)
  treatment of cell esds is used for estimating esds involving l.s. planes.
;
 
loop_
  _geom_bond_atom_site_label_1
  _geom_bond_atom_site_label_2
  _geom_bond_distance
  _geom_bond_site_symmetry_2
  _geom_bond_publ_flag
Mo1 O2 1.707(6) . ?
Mo1 O1 1.737(6) . ?
Mo1 O3 1.898(6) . ?
Mo1 O5 1.914(6) . ?
Mo1 O6 2.211(5) . ?
Mo1 O4 2.417(6) . ?
Mo2 O21 1.699(6) . ?
Mo2 O20 1.719(6) . ?
Mo2 O17 1.896(6) . ?
Mo2 O5 1.925(6) . ?
Mo2 O6 2.325(6) . ?
Mo2 O19 2.445(6) . ?
Mo3 O7 1.692(6) . ?
Mo3 O8 1.706(6) . ?
Mo3 O9 1.896(6) . ?
Mo3 O3 1.955(6) . ?
Mo3 O10 2.303(6) . ?
Mo3 O4 2.344(6) . ?
Mo4 O12 1.698(6) . ?
Mo4 O11 1.702(6) . ?
Mo4 O9 1.932(6) . ?
Mo4 O14 1.969(6) . ?
Mo4 O13 2.249(6) . ?
Mo4 O10 2.359(6) . ?
Mo5 O16 1.704(6) . ?
Mo5 O15 1.753(6) . ?
Mo5 O14 1.874(6) . ?
Mo5 O17 1.920(6) . ?
Mo5 O18 2.196(6) . ?
Mo5 O13 2.434(7) . ?
Cu1 N1 1.944(7) . ?
Cu1 N3 1.973(7) . ?
Cu1 N2 2.030(7) . ?
Cu1 N4 2.053(8) . ?
Cu1 O1 2.150(6) . ?
Cu2 O19 1.943(6) . ?
Cu2 O22 1.963(7) . ?
Cu2 N5 1.997(8) . ?
Cu2 N6 1.999(8) . ?
Cu2 O20 2.362(6) . ?
P1 O18 1.506(6) . ?
P1 O10 1.539(6) . ?
P1 O6 1.567(6) . ?
P1 C31 1.768(9) . ?
P2 O19 1.536(6) . ?
P2 O4 1.542(6) . ?
P2 O13 1.543(7) . ?
P2 C33 1.805(11) . ?
N1 C1 1.343(11) . ?
N1 C5 1.383(11) . ?
N2 C6 1.342(11) . ?
N2 C10 1.353(11) . ?
N3 C11 1.323(11) . ?
N3 C15 1.362(11) . ?
N4 C20 1.339(12) . ?
N4 C16 1.357(11) . ?
N5 C21 1.321(12) . ?
N5 C25 1.363(11) . ?
N6 C30 1.347(12) . ?
N6 C26 1.367(11) . ?
C1 C2 1.395(13) . ?
C2 C3 1.387(13) . ?
C3 C4 1.395(13) . ?
C4 C5 1.361(12) . ?
C5 C6 1.475(12) . ?
C6 C7 1.375(12) . ?
C7 C8 1.402(12) . ?
C8 C9 1.350(12) . ?
C9 C10 1.390(12) . ?
C11 C12 1.375(13) . ?
C12 C13 1.370(14) . ?
C13 C14 1.372(13) . ?
C14 C15 1.401(12) . ?
C15 C16 1.468(13) . ?
C16 C17 1.383(12) . ?
C17 C18 1.373(12) . ?
C18 C19 1.365(12) . ?
C19 C20 1.373(13) . ?
C21 C22 1.370(13) . ?
C22 C23 1.402(13) . ?
C23 C24 1.374(13) . ?
C24 C25 1.363(13) . ?
C26 C27 1.396(13) . ?
C26 C25 1.475(13) . ?
C27 C28 1.383(14) . ?
C28 C29 1.365(14) . ?
C29 C30 1.386(14) . ?
C31 C32 1.530(11) . ?
C32 C32 1.528(15) 2_666 ?
C33 C34 1.40(2) . ?
C33 C35 1.40(3) . ?
C34 C35 1.63(3) 2_575 ?
C34 C35 2.02(4) . ?
C35 C34 1.63(3) 2_575 ?
 
loop_
  _geom_angle_atom_site_label_1
  _geom_angle_atom_site_label_2
  _geom_angle_atom_site_label_3
  _geom_angle
  _geom_angle_site_symmetry_1
  _geom_angle_site_symmetry_3
  _geom_angle_publ_flag
O2 Mo1 O1 103.3(3) . . ?
O2 Mo1 O3 97.9(3) . . ?
O1 Mo1 O3 102.2(3) . . ?
O2 Mo1 O5 99.3(3) . . ?
O1 Mo1 O5 97.1(3) . . ?
O3 Mo1 O5 150.4(2) . . ?
O2 Mo1 O6 96.9(2) . . ?
O1 Mo1 O6 158.2(2) . . ?
O3 Mo1 O6 83.0(2) . . ?
O5 Mo1 O6 71.2(2) . . ?
O2 Mo1 O4 166.2(2) . . ?
O1 Mo1 O4 87.6(2) . . ?
O3 Mo1 O4 71.1(2) . . ?
O5 Mo1 O4 87.6(2) . . ?
O6 Mo1 O4 73.9(2) . . ?
O21 Mo2 O20 103.3(3) . . ?
O21 Mo2 O17 102.4(3) . . ?
O20 Mo2 O17 101.4(3) . . ?
O21 Mo2 O5 103.2(3) . . ?
O20 Mo2 O5 99.2(3) . . ?
O17 Mo2 O5 142.2(3) . . ?
O21 Mo2 O6 92.4(2) . . ?
O20 Mo2 O6 162.1(2) . . ?
O17 Mo2 O6 83.2(2) . . ?
O5 Mo2 O6 68.5(2) . . ?
O21 Mo2 O19 177.8(3) . . ?
O20 Mo2 O19 77.7(2) . . ?
O17 Mo2 O19 79.2(2) . . ?
O5 Mo2 O19 74.6(2) . . ?
O6 Mo2 O19 86.27(19) . . ?
O7 Mo3 O8 103.1(3) . . ?
O7 Mo3 O9 98.9(3) . . ?
O8 Mo3 O9 103.1(3) . . ?
O7 Mo3 O3 101.8(3) . . ?
O8 Mo3 O3 98.4(3) . . ?
O9 Mo3 O3 145.7(3) . . ?
O7 Mo3 O10 166.8(3) . . ?
O8 Mo3 O10 89.1(3) . . ?
O9 Mo3 O10 73.0(2) . . ?
O3 Mo3 O10 81.1(2) . . ?
O7 Mo3 O4 87.6(3) . . ?
O8 Mo3 O4 167.1(3) . . ?
O9 Mo3 O4 82.0(2) . . ?
O3 Mo3 O4 72.0(2) . . ?
O10 Mo3 O4 81.0(2) . . ?
O12 Mo4 O11 104.3(3) . . ?
O12 Mo4 O9 97.9(3) . . ?
O11 Mo4 O9 101.2(3) . . ?
O12 Mo4 O14 98.4(3) . . ?
O11 Mo4 O14 97.9(3) . . ?
O9 Mo4 O14 150.9(2) . . ?
O12 Mo4 O13 96.0(3) . . ?
O11 Mo4 O13 158.8(3) . . ?
O9 Mo4 O13 81.8(2) . . ?
O14 Mo4 O13 72.7(2) . . ?
O12 Mo4 O10 164.9(3) . . ?
O11 Mo4 O10 88.2(2) . . ?
O9 Mo4 O10 71.1(2) . . ?
O14 Mo4 O10 87.8(2) . . ?
O13 Mo4 O10 72.7(2) . . ?
O16 Mo5 O15 101.5(3) . . ?
O16 Mo5 O14 101.3(3) . . ?
O15 Mo5 O14 100.7(3) . . ?
O16 Mo5 O17 104.9(3) . . ?
O15 Mo5 O17 96.2(3) . . ?
O14 Mo5 O17 145.2(3) . . ?
O16 Mo5 O18 88.0(3) . . ?
O15 Mo5 O18 170.2(3) . . ?
O14 Mo5 O18 79.5(2) . . ?
O17 Mo5 O18 78.9(2) . . ?
O16 Mo5 O13 170.9(3) . . ?
O15 Mo5 O13 82.5(3) . . ?
O14 Mo5 O13 69.9(2) . . ?
O17 Mo5 O13 82.5(2) . . ?
O18 Mo5 O13 88.4(2) . . ?
N1 Cu1 N3 174.2(3) . . ?
N1 Cu1 N2 81.6(3) . . ?
N3 Cu1 N2 97.2(3) . . ?
N1 Cu1 N4 104.1(3) . . ?
N3 Cu1 N4 80.9(3) . . ?
N2 Cu1 N4 133.2(3) . . ?
N1 Cu1 O1 88.9(3) . . ?
N3 Cu1 O1 87.2(3) . . ?
N2 Cu1 O1 125.7(3) . . ?
N4 Cu1 O1 101.0(3) . . ?
O19 Cu2 O22 88.7(3) . . ?
O19 Cu2 N5 176.7(3) . . ?
O22 Cu2 N5 94.5(3) . . ?
O19 Cu2 N6 94.9(3) . . ?
O22 Cu2 N6 171.1(3) . . ?
N5 Cu2 N6 82.0(3) . . ?
O19 Cu2 O20 76.1(2) . . ?
O22 Cu2 O20 95.2(3) . . ?
N5 Cu2 O20 103.0(3) . . ?
N6 Cu2 O20 93.6(2) . . ?
O18 P1 O10 111.6(3) . . ?
O18 P1 O6 109.0(3) . . ?
O10 P1 O6 111.0(3) . . ?
O18 P1 C31 109.0(4) . . ?
O10 P1 C31 108.6(4) . . ?
O6 P1 C31 107.6(4) . . ?
O19 P2 O4 108.7(3) . . ?
O19 P2 O13 108.9(4) . . ?
O4 P2 O13 112.3(3) . . ?
O19 P2 C33 107.6(4) . . ?
O4 P2 C33 109.5(5) . . ?
O13 P2 C33 109.8(4) . . ?
Mo1 O1 Cu1 143.7(3) . . ?
Mo1 O3 Mo3 125.1(3) . . ?
P2 O4 Mo3 124.3(3) . . ?
P2 O4 Mo1 128.7(3) . . ?
Mo3 O4 Mo1 91.8(2) . . ?
Mo1 O5 Mo2 123.7(3) . . ?
P1 O6 Mo1 129.8(3) . . ?
P1 O6 Mo2 132.4(3) . . ?
Mo1 O6 Mo2 96.5(2) . . ?
Mo3 O9 Mo4 123.3(3) . . ?
P1 O10 Mo3 127.9(3) . . ?
P1 O10 Mo4 127.9(3) . . ?
Mo3 O10 Mo4 92.5(2) . . ?
P2 O13 Mo4 129.5(4) . . ?
P2 O13 Mo5 135.7(3) . . ?
Mo4 O13 Mo5 92.7(2) . . ?
Mo5 O14 Mo4 123.9(3) . . ?
Mo2 O17 Mo5 152.2(4) . . ?
P1 O18 Mo5 122.1(3) . . ?
P2 O19 Cu2 142.0(4) . . ?
P2 O19 Mo2 118.7(3) . . ?
Cu2 O19 Mo2 97.8(2) . . ?
Mo2 O20 Cu2 108.0(3) . . ?
C1 N1 C5 118.4(8) . . ?
C1 N1 Cu1 125.4(6) . . ?
C5 N1 Cu1 115.6(6) . . ?
C6 N2 C10 117.8(8) . . ?
C6 N2 Cu1 113.7(6) . . ?
C10 N2 Cu1 128.5(6) . . ?
C11 N3 C15 118.8(8) . . ?
C11 N3 Cu1 125.8(6) . . ?
C15 N3 Cu1 115.3(6) . . ?
C20 N4 C16 117.9(8) . . ?
C20 N4 Cu1 128.2(6) . . ?
C16 N4 Cu1 113.8(6) . . ?
C21 N5 C25 118.4(8) . . ?
C21 N5 Cu2 127.4(7) . . ?
C25 N5 Cu2 114.2(6) . . ?
C30 N6 C26 118.3(8) . . ?
C30 N6 Cu2 127.5(7) . . ?
C26 N6 Cu2 114.2(6) . . ?
N1 C1 C2 121.7(9) . . ?
C3 C2 C1 120.1(9) . . ?
C2 C3 C4 117.5(9) . . ?
C5 C4 C3 120.8(9) . . ?
C4 C5 N1 121.4(8) . . ?
C4 C5 C6 125.2(8) . . ?
N1 C5 C6 113.3(8) . . ?
N2 C6 C7 123.1(9) . . ?
N2 C6 C5 115.1(8) . . ?
C7 C6 C5 121.8(9) . . ?
C6 C7 C8 118.5(9) . . ?
C9 C8 C7 119.0(9) . . ?
C8 C9 C10 119.9(9) . . ?
N2 C10 C9 121.8(9) . . ?
N3 C11 C12 123.3(9) . . ?
C13 C12 C11 118.4(10) . . ?
C12 C13 C14 119.9(9) . . ?
C13 C14 C15 119.0(9) . . ?
N3 C15 C14 120.4(9) . . ?
N3 C15 C16 115.7(8) . . ?
C14 C15 C16 123.9(9) . . ?
N4 C16 C17 121.3(9) . . ?
N4 C16 C15 114.1(8) . . ?
C17 C16 C15 124.6(8) . . ?
C18 C17 C16 119.4(9) . . ?
C17 C18 C19 119.4(9) . . ?
C18 C19 C20 118.9(9) . . ?
N4 C20 C19 123.0(9) . . ?
N5 C21 C22 124.7(10) . . ?
C21 C22 C23 116.7(10) . . ?
C24 C23 C22 118.9(9) . . ?
C23 C24 C25 120.8(9) . . ?
N6 C26 C27 120.8(9) . . ?
N6 C26 C25 114.7(8) . . ?
C27 C26 C25 124.5(9) . . ?
C28 C27 C26 120.0(10) . . ?
C29 C28 C27 118.6(10) . . ?
C28 C29 C30 120.0(10) . . ?
N6 C30 C29 122.2(9) . . ?
C32 C31 P1 114.3(6) . . ?
C32 C32 C31 111.1(9) 2_666 . ?
C34 C33 C35 92.3(16) . . ?
C34 C33 P2 119.0(12) . . ?
C35 C33 P2 122.2(14) . . ?
C33 C34 C35 124.9(19) . 2_575 ?
C33 C34 C35 43.7(11) . . ?
C35 C34 C35 99.5(16) 2_575 . ?
C33 C35 C34 110(2) . 2_575 ?
C33 C35 C34 44.0(11) . . ?
C34 C35 C34 80.5(16) 2_575 . ?
N5 C25 C24 120.4(9) . . ?
N5 C25 C26 115.0(8) . . ?
C24 C25 C26 124.6(9) . . ?
 
_diffrn_measured_fraction_theta_max    0.940
_diffrn_reflns_theta_full              28.29
_diffrn_measured_fraction_theta_full   0.940
_refine_diff_density_max    1.454
_refine_diff_density_min   -1.266
_refine_diff_density_rms    0.054

#===END

data_p21-n
 
_audit_creation_method            SHELXL-97
_chemical_name_systematic
;
  ?
;
_chemical_name_common             ?
_chemical_melting_point           ?
_chemical_formula_moiety          ?
_chemical_formula_sum
  'C16 H13 Cu Mo2 N3 O11 P2'
_chemical_formula_weight          740.65
 
loop_
  _atom_type_symbol
  _atom_type_description
  _atom_type_scat_dispersion_real
  _atom_type_scat_dispersion_imag
  _atom_type_scat_source
  'C'  'C'   0.0033   0.0016
  'International Tables Vol C Tables 4.2.6.8 and 6.1.1.4'
  'H'  'H'   0.0000   0.0000
  'International Tables Vol C Tables 4.2.6.8 and 6.1.1.4'
  'N'  'N'   0.0061   0.0033
  'International Tables Vol C Tables 4.2.6.8 and 6.1.1.4'
  'O'  'O'   0.0106   0.0060
  'International Tables Vol C Tables 4.2.6.8 and 6.1.1.4'
  'P'  'P'   0.1023   0.0942
  'International Tables Vol C Tables 4.2.6.8 and 6.1.1.4'
  'Cu'  'Cu'   0.3201   1.2651
  'International Tables Vol C Tables 4.2.6.8 and 6.1.1.4'
  'Mo'  'Mo'  -1.6832   0.6857
  'International Tables Vol C Tables 4.2.6.8 and 6.1.1.4'
 
_symmetry_cell_setting            Monoclinic
_symmetry_space_group_name_H-M    P2(1)/n
 
loop_
  _symmetry_equiv_pos_as_xyz
  'x, y, z'
  '-x+1/2, y+1/2, -z+1/2'
  '-x, -y, -z'
  'x-1/2, -y-1/2, z-1/2'
 
_cell_length_a                    8.5995(5)
_cell_length_b                    20.8533(13)
_cell_length_c                    12.5137(7)
_cell_angle_alpha                 90.00
_cell_angle_beta                  110.0260(10)
_cell_angle_gamma                 90.00
_cell_volume                      2108.4(2)
_cell_formula_units_Z             4
_cell_measurement_temperature     293(2)
_cell_measurement_reflns_used     ?
_cell_measurement_theta_min       ?
_cell_measurement_theta_max       ?
 
_exptl_crystal_description        Plate
_exptl_crystal_colour             Blue
_exptl_crystal_size_max           0.27
_exptl_crystal_size_mid           0.22
_exptl_crystal_size_min           0.11
_exptl_crystal_density_meas       ?
_exptl_crystal_density_diffrn     2.333
_exptl_crystal_density_method     'not measured'
_exptl_crystal_F_000              1444
_exptl_absorpt_coefficient_mu     2.392
_exptl_absorpt_correction_type    SADABS
_exptl_absorpt_correction_T_min   ?
_exptl_absorpt_correction_T_max   ?
_exptl_absorpt_process_details    ?
 
_exptl_special_details
;
  ?
;
 
_diffrn_ambient_temperature       293(2)
_diffrn_radiation_wavelength      0.71073
_diffrn_radiation_type            MoK\a
_diffrn_radiation_source          'fine-focus sealed tube'
_diffrn_radiation_monochromator   graphite
_diffrn_measurement_device_type   ?
_diffrn_measurement_method        ?
_diffrn_detector_area_resol_mean  ?
_diffrn_standards_number          ?
_diffrn_standards_interval_count  ?
_diffrn_standards_interval_time   ?
_diffrn_standards_decay_%         ?
_diffrn_reflns_number             14114
_diffrn_reflns_av_R_equivalents   0.0751
_diffrn_reflns_av_sigmaI/netI     0.1067
_diffrn_reflns_limit_h_min        -11
_diffrn_reflns_limit_h_max        11
_diffrn_reflns_limit_k_min        -27
_diffrn_reflns_limit_k_max        24
_diffrn_reflns_limit_l_min        -16
_diffrn_reflns_limit_l_max        16
_diffrn_reflns_theta_min          1.95
_diffrn_reflns_theta_max          28.29
_reflns_number_total              5108
_reflns_number_gt                 3253
_reflns_threshold_expression      >2sigma(I)
 
_computing_data_collection        ?
_computing_cell_refinement        ?
_computing_data_reduction         ?
_computing_structure_solution     'SHELXS-97 (Sheldrick, 1990)'
_computing_structure_refinement   'SHELXL-97 (Sheldrick, 1997)'
_computing_molecular_graphics     ?
_computing_publication_material   ?
 
_refine_special_details
;
  Refinement of F^2^ against ALL reflections.  The weighted R-factor wR and
  goodness of fit S are based on F^2^, conventional R-factors R are based
  on F, with F set to zero for negative F^2^. The threshold expression of
  F^2^ > 2sigma(F^2^) is used only for calculating R-factors(gt) etc. and is
  not relevant to the choice of reflections for refinement.  R-factors based
  on F^2^ are statistically about twice as large as those based on F, and R-
  factors based on ALL data will be even larger.
;
 
_refine_ls_structure_factor_coef  Fsqd
_refine_ls_matrix_type            full
_refine_ls_weighting_scheme       calc
_refine_ls_weighting_details
  'calc w=1/[\s^2^(Fo^2^)+(0.0347P)^2^+0.0000P] where P=(Fo^2^+2Fc^2^)/3'
_atom_sites_solution_primary      direct
_atom_sites_solution_secondary    difmap
_atom_sites_solution_hydrogens    geom
_refine_ls_hydrogen_treatment     mixed
_refine_ls_extinction_method      SHELXL
_refine_ls_extinction_coef        0.00023(7)
_refine_ls_extinction_expression
  'Fc^*^=kFc[1+0.001xFc^2^\l^3^/sin(2\q)]^-1/4^'
_refine_ls_number_reflns          5108
_refine_ls_number_parameters      308
_refine_ls_number_restraints      0
_refine_ls_R_factor_all           0.0928
_refine_ls_R_factor_gt            0.0436
_refine_ls_wR_factor_ref          0.0927
_refine_ls_wR_factor_gt           0.0812
_refine_ls_goodness_of_fit_ref    0.946
_refine_ls_restrained_S_all       0.946
_refine_ls_shift/su_max           0.002
_refine_ls_shift/su_mean          0.001
 
loop_
  _atom_site_label
  _atom_site_type_symbol
  _atom_site_fract_x
  _atom_site_fract_y
  _atom_site_fract_z
  _atom_site_U_iso_or_equiv
  _atom_site_adp_type
  _atom_site_occupancy
  _atom_site_symmetry_multiplicity
  _atom_site_calc_flag
  _atom_site_refinement_flags
  _atom_site_disorder_assembly
  _atom_site_disorder_group
Mo1 Mo 0.51295(6) 0.12007(2) 0.41692(4) 0.00639(12) Uani 1 1 d . . .
Mo2 Mo 0.90630(6) 0.11757(2) 0.42121(4) 0.00667(12) Uani 1 1 d . . .
Cu1 Cu 0.68839(8) 0.01459(3) 0.02772(5) 0.00829(17) Uani 1 1 d . . .
P1 P 0.62652(18) 0.01646(7) 0.25441(11) 0.0065(3) Uani 1 1 d . . .
P2 P 0.73980(18) -0.02463(7) 0.49332(11) 0.0059(3) Uani 1 1 d . . .
O1 O 0.5726(4) -0.00639(17) 0.1298(3) 0.0068(8) Uani 1 1 d . . .
O2 O 0.7931(4) 0.05084(17) 0.2861(3) 0.0061(8) Uani 1 1 d . . .
O3 O 0.4934(4) 0.05776(17) 0.2739(3) 0.0061(8) Uani 1 1 d . . .
O4 O 1.0827(4) 0.04773(17) 0.4541(3) 0.0067(8) Uani 1 1 d . . .
O5 O 0.9875(5) 0.16385(18) 0.3424(3) 0.0116(9) Uani 1 1 d . . .
O6 O 0.9932(5) 0.14640(19) 0.5574(3) 0.0112(9) Uani 1 1 d . . .
O7 O 0.6932(4) 0.15575(17) 0.3798(3) 0.0078(8) Uani 1 1 d . . .
O8 O 0.5605(5) 0.14776(18) 0.5526(3) 0.0109(9) Uani 1 1 d . . .
O9 O 0.3610(5) 0.17009(18) 0.3399(3) 0.0108(9) Uani 1 1 d . . .
O10 O 0.7399(4) 0.04871(17) 0.4912(3) 0.0071(8) Uani 1 1 d . . .
O11 O 0.6310(5) -0.04885(17) 0.5590(3) 0.0077(8) Uani 1 1 d . . .
N1 N 0.7525(6) -0.0768(2) 0.0082(4) 0.0086(10) Uani 1 1 d . . .
N2 N 0.7938(6) 0.0283(2) -0.0825(4) 0.0095(10) Uani 1 1 d . . .
N3 N 0.6905(6) 0.1120(2) 0.0279(4) 0.0113(11) Uani 1 1 d . . .
C1 C 0.7271(7) -0.1291(3) 0.0606(5) 0.0132(13) Uani 1 1 d . . .
H1 H 0.6794 -0.1246 0.1166 0.016 Uiso 1 1 calc R . .
C2 C 0.7687(7) -0.1904(3) 0.0352(5) 0.0171(14) Uani 1 1 d . . .
H2 H 0.7521 -0.2259 0.0750 0.021 Uiso 1 1 calc R . .
C3 C 0.8349(7) -0.1973(3) -0.0498(5) 0.0171(14) Uani 1 1 d . . .
H3 H 0.8606 -0.2378 -0.0703 0.021 Uiso 1 1 calc R . .
C4 C 0.8629(7) -0.1426(3) -0.1049(5) 0.0144(14) Uani 1 1 d . . .
H4 H 0.9091 -0.1461 -0.1618 0.017 Uiso 1 1 calc R . .
C5 C 0.8217(7) -0.0839(3) -0.0743(4) 0.0087(12) Uiso 1 1 d . . .
C6 C 0.8459(7) -0.0223(3) -0.1258(5) 0.0104(12) Uiso 1 1 d . . .
C7 C 0.9176(7) -0.0145(3) -0.2082(4) 0.0123(13) Uani 1 1 d . . .
H7 H 0.9592 -0.0493 -0.2365 0.015 Uiso 1 1 calc R . .
C8 C 0.9250(7) 0.0479(3) -0.2475(5) 0.0163(14) Uani 1 1 d . . .
H8 H 0.9718 0.0546 -0.3035 0.020 Uiso 1 1 calc R . .
C9 C 0.8648(7) 0.0994(3) -0.2053(5) 0.0152(14) Uani 1 1 d . . .
H9 H 0.8660 0.1403 -0.2345 0.018 Uiso 1 1 calc R . .
C10 C 0.8024(7) 0.0891(3) -0.1183(5) 0.0094(12) Uani 1 1 d . . .
C11 C 0.7454(7) 0.1368(3) -0.0535(5) 0.0106(13) Uani 1 1 d . . .
C12 C 0.7564(7) 0.2023(3) -0.0673(5) 0.0156(14) Uani 1 1 d . . .
H12 H 0.7890 0.2184 -0.1257 0.019 Uiso 1 1 calc R . .
C13 C 0.7184(7) 0.2438(3) 0.0066(5) 0.0196(15) Uani 1 1 d . . .
H13 H 0.7289 0.2879 0.0006 0.024 Uiso 1 1 calc R . .
C14 C 0.6646(7) 0.2182(3) 0.0893(5) 0.0149(14) Uani 1 1 d . . .
H14 H 0.6385 0.2450 0.1402 0.018 Uiso 1 1 calc R . .
C15 C 0.6499(7) 0.1533(3) 0.0959(5) 0.0140(13) Uani 1 1 d . . .
H15 H 0.6097 0.1370 0.1505 0.017 Uiso 1 1 calc R . .
C16 C 0.6563(7) -0.0526(3) 0.3474(4) 0.0098(18) Uani 1.000(17) 1 d . . .
H16A H 0.7324 -0.0826 0.3322 0.012 Uiso 1 1 calc R . .
H16B H 0.5517 -0.0743 0.3344 0.012 Uiso 1 1 calc R . .
 
loop_
  _atom_site_aniso_label
  _atom_site_aniso_U_11
  _atom_site_aniso_U_22
  _atom_site_aniso_U_33
  _atom_site_aniso_U_23
  _atom_site_aniso_U_13
  _atom_site_aniso_U_12
Mo1 0.0062(3) 0.0071(3) 0.0055(2) -0.0005(2) 0.0014(2) 0.0000(2)
Mo2 0.0053(3) 0.0076(3) 0.0065(2) -0.0004(2) 0.00116(19) -0.0009(2)
Cu1 0.0091(4) 0.0089(4) 0.0075(3) 0.0005(3) 0.0036(3) 0.0001(3)
P1 0.0056(7) 0.0087(8) 0.0048(7) -0.0001(6) 0.0012(6) -0.0001(6)
P2 0.0052(7) 0.0078(8) 0.0040(7) -0.0001(6) 0.0006(6) -0.0002(6)
O1 0.006(2) 0.009(2) 0.0039(18) -0.0009(16) 0.0000(16) -0.0023(16)
O2 0.006(2) 0.008(2) 0.0036(18) -0.0010(15) 0.0008(16) 0.0007(16)
O3 0.003(2) 0.009(2) 0.0061(19) -0.0008(16) 0.0019(16) 0.0000(16)
O4 0.003(2) 0.010(2) 0.0068(19) -0.0029(16) 0.0010(16) -0.0007(16)
O5 0.012(2) 0.011(2) 0.010(2) 0.0010(17) 0.0007(18) -0.0012(17)
O6 0.009(2) 0.012(2) 0.011(2) -0.0036(17) 0.0014(17) -0.0054(17)
O7 0.008(2) 0.007(2) 0.0086(19) -0.0024(16) 0.0028(17) -0.0025(16)
O8 0.015(2) 0.011(2) 0.007(2) -0.0006(17) 0.0039(17) -0.0021(18)
O9 0.009(2) 0.012(2) 0.012(2) 0.0041(17) 0.0042(18) 0.0048(17)
O10 0.007(2) 0.009(2) 0.0032(19) -0.0013(16) -0.0007(16) -0.0016(16)
O11 0.006(2) 0.009(2) 0.0081(19) 0.0006(16) 0.0016(17) 0.0003(16)
N1 0.006(3) 0.015(3) 0.003(2) -0.001(2) -0.0015(19) 0.002(2)
N2 0.009(3) 0.013(3) 0.007(2) 0.001(2) 0.003(2) -0.001(2)
N3 0.009(3) 0.013(3) 0.010(2) 0.003(2) 0.001(2) -0.002(2)
C1 0.006(3) 0.018(4) 0.014(3) 0.001(3) 0.001(2) 0.000(2)
C2 0.020(4) 0.014(3) 0.014(3) -0.002(3) 0.002(3) 0.001(3)
C3 0.014(3) 0.014(3) 0.015(3) -0.009(3) -0.005(3) 0.006(3)
C4 0.010(3) 0.022(4) 0.008(3) -0.005(3) -0.001(2) 0.004(3)
C7 0.007(3) 0.021(3) 0.007(3) -0.003(3) 0.001(2) -0.002(3)
C8 0.009(3) 0.034(4) 0.006(3) -0.002(3) 0.003(3) -0.008(3)
C9 0.014(3) 0.023(4) 0.008(3) 0.005(3) 0.002(3) 0.002(3)
C10 0.003(3) 0.015(3) 0.007(3) 0.003(2) -0.001(2) -0.002(2)
C11 0.006(3) 0.012(3) 0.010(3) 0.005(2) -0.002(2) 0.000(2)
C12 0.010(3) 0.016(4) 0.020(3) 0.006(3) 0.005(3) 0.001(3)
C13 0.011(3) 0.010(3) 0.033(4) 0.013(3) 0.002(3) 0.000(3)
C14 0.011(3) 0.012(3) 0.015(3) -0.001(3) -0.003(3) 0.002(3)
C15 0.011(3) 0.020(4) 0.008(3) -0.003(3) -0.001(3) 0.000(3)
C16 0.003(3) 0.015(4) 0.008(3) 0.003(2) -0.003(2) -0.002(2)
 
_geom_special_details
;
  All esds (except the esd in the dihedral angle between two l.s. planes)
  are estimated using the full covariance matrix.  The cell esds are taken
  into account individually in the estimation of esds in distances, angles
  and torsion angles; correlations between esds in cell parameters are only
  used when they are defined by crystal symmetry.  An approximate (isotropic)
  treatment of cell esds is used for estimating esds involving l.s. planes.
;
 
loop_
  _geom_bond_atom_site_label_1
  _geom_bond_atom_site_label_2
  _geom_bond_distance
  _geom_bond_site_symmetry_2
  _geom_bond_publ_flag
Mo1 O9 1.692(4) . ?
Mo1 O8 1.706(4) . ?
Mo1 O7 1.915(4) . ?
Mo1 O11 2.021(4) 3_656 ?
Mo1 O3 2.171(3) . ?
Mo1 O10 2.376(4) . ?
Mo2 O5 1.692(4) . ?
Mo2 O6 1.718(4) . ?
Mo2 O7 1.900(4) . ?
Mo2 O4 2.041(4) . ?
Mo2 O2 2.149(4) . ?
Mo2 O10 2.395(4) . ?
Cu1 N2 1.914(4) . ?
Cu1 O1 1.919(3) . ?
Cu1 N1 2.022(5) . ?
Cu1 N3 2.032(5) . ?
Cu1 O1 2.433(3) 3_655 ?
P1 O3 1.518(4) . ?
P1 O2 1.528(4) . ?
P1 O1 1.543(3) . ?
P1 C16 1.813(5) . ?
P2 O4 1.519(4) 3_756 ?
P2 O11 1.527(4) . ?
P2 O10 1.530(4) . ?
P2 C16 1.814(5) . ?
O1 Cu1 2.433(3) 3_655 ?
O4 P2 1.519(4) 3_756 ?
O11 Mo1 2.021(4) 3_656 ?
N1 C1 1.329(7) . ?
N1 C5 1.365(6) . ?
N2 C6 1.332(7) . ?
N2 C10 1.355(7) . ?
N3 C15 1.338(7) . ?
N3 C11 1.363(7) . ?
C1 C2 1.393(8) . ?
C2 C3 1.376(8) . ?
C3 C4 1.395(8) . ?
C4 C5 1.365(8) . ?
C5 C6 1.484(8) . ?
C6 C7 1.381(7) . ?
C7 C8 1.400(8) . ?
C8 C9 1.374(8) . ?
C9 C10 1.385(7) . ?
C10 C11 1.468(8) . ?
C11 C12 1.386(8) . ?
C12 C13 1.385(8) . ?
C13 C14 1.377(8) . ?
C14 C15 1.364(8) . ?
 
loop_
  _geom_angle_atom_site_label_1
  _geom_angle_atom_site_label_2
  _geom_angle_atom_site_label_3
  _geom_angle
  _geom_angle_site_symmetry_1
  _geom_angle_site_symmetry_3
  _geom_angle_publ_flag
O9 Mo1 O8 103.52(18) . . ?
O9 Mo1 O7 98.84(17) . . ?
O8 Mo1 O7 99.91(17) . . ?
O9 Mo1 O11 98.34(17) . 3_656 ?
O8 Mo1 O11 92.91(16) . 3_656 ?
O7 Mo1 O11 155.49(15) . 3_656 ?
O9 Mo1 O3 94.16(16) . . ?
O8 Mo1 O3 161.41(16) . . ?
O7 Mo1 O3 82.71(14) . . ?
O11 Mo1 O3 78.72(14) 3_656 . ?
O9 Mo1 O10 168.46(15) . . ?
O8 Mo1 O10 86.44(15) . . ?
O7 Mo1 O10 73.35(14) . . ?
O11 Mo1 O10 86.82(14) 3_656 . ?
O3 Mo1 O10 76.64(12) . . ?
O5 Mo2 O6 104.63(18) . . ?
O5 Mo2 O7 98.86(17) . . ?
O6 Mo2 O7 100.09(17) . . ?
O5 Mo2 O4 95.62(16) . . ?
O6 Mo2 O4 90.51(16) . . ?
O7 Mo2 O4 159.23(15) . . ?
O5 Mo2 O2 94.41(16) . . ?
O6 Mo2 O2 158.94(16) . . ?
O7 Mo2 O2 85.53(14) . . ?
O4 Mo2 O2 78.56(14) . . ?
O5 Mo2 O10 166.56(15) . . ?
O6 Mo2 O10 87.62(15) . . ?
O7 Mo2 O10 73.12(14) . . ?
O4 Mo2 O10 89.68(13) . . ?
O2 Mo2 O10 74.51(12) . . ?
N2 Cu1 O1 174.42(18) . . ?
N2 Cu1 N1 80.68(19) . . ?
O1 Cu1 N1 95.20(17) . . ?
N2 Cu1 N3 81.08(19) . . ?
O1 Cu1 N3 103.49(17) . . ?
N1 Cu1 N3 160.06(19) . . ?
N2 Cu1 O1 87.72(16) . 3_655 ?
O1 Cu1 O1 88.74(13) . 3_655 ?
N1 Cu1 O1 92.87(15) . 3_655 ?
N3 Cu1 O1 94.40(15) . 3_655 ?
O3 P1 O2 112.6(2) . . ?
O3 P1 O1 110.9(2) . . ?
O2 P1 O1 109.7(2) . . ?
O3 P1 C16 107.2(2) . . ?
O2 P1 C16 107.0(2) . . ?
O1 P1 C16 109.3(2) . . ?
O4 P2 O11 111.8(2) 3_756 . ?
O4 P2 O10 108.6(2) 3_756 . ?
O11 P2 O10 110.1(2) . . ?
O4 P2 C16 109.1(2) 3_756 . ?
O11 P2 C16 109.4(2) . . ?
O10 P2 C16 107.8(2) . . ?
P1 O1 Cu1 123.9(2) . . ?
P1 O1 Cu1 135.6(2) . 3_655 ?
Cu1 O1 Cu1 91.26(13) . 3_655 ?
P1 O2 Mo2 129.8(2) . . ?
P1 O3 Mo1 128.5(2) . . ?
P2 O4 Mo2 151.8(2) 3_756 . ?
Mo2 O7 Mo1 123.81(19) . . ?
P2 O10 Mo1 128.9(2) . . ?
P2 O10 Mo2 127.6(2) . . ?
Mo1 O10 Mo2 89.72(12) . . ?
P2 O11 Mo1 147.4(2) . 3_656 ?
C1 N1 C5 118.2(5) . . ?
C1 N1 Cu1 128.1(4) . . ?
C5 N1 Cu1 113.7(4) . . ?
C6 N2 C10 122.9(5) . . ?
C6 N2 Cu1 118.9(4) . . ?
C10 N2 Cu1 118.1(4) . . ?
C15 N3 C11 117.7(5) . . ?
C15 N3 Cu1 129.8(4) . . ?
C11 N3 Cu1 112.5(4) . . ?
N1 C1 C2 122.9(6) . . ?
C3 C2 C1 118.6(6) . . ?
C2 C3 C4 118.9(6) . . ?
C5 C4 C3 119.3(5) . . ?
N1 C5 C4 122.1(5) . . ?
N1 C5 C6 113.3(5) . . ?
C4 C5 C6 124.5(5) . . ?
N2 C6 C7 120.6(5) . . ?
N2 C6 C5 113.2(5) . . ?
C7 C6 C5 126.2(5) . . ?
C6 C7 C8 117.2(6) . . ?
C9 C8 C7 121.5(5) . . ?
C8 C9 C10 118.7(6) . . ?
N2 C10 C9 119.0(5) . . ?
N2 C10 C11 112.6(5) . . ?
C9 C10 C11 128.5(6) . . ?
N3 C11 C12 121.5(5) . . ?
N3 C11 C10 115.1(5) . . ?
C12 C11 C10 123.3(5) . . ?
C13 C12 C11 119.4(6) . . ?
C14 C13 C12 118.5(6) . . ?
C15 C14 C13 119.5(6) . . ?
N3 C15 C14 123.4(6) . . ?
P1 C16 P2 108.1(3) . . ?
 
_diffrn_measured_fraction_theta_max    0.973
_diffrn_reflns_theta_full              28.29
_diffrn_measured_fraction_theta_full   0.973
_refine_diff_density_max    0.982
_refine_diff_density_min   -1.013
_refine_diff_density_rms    0.196

#===END

data_c2-c
 
_audit_creation_method            SHELXL-97
_chemical_name_systematic
;
  ?
;
_chemical_name_common             ?
_chemical_melting_point           ?
_chemical_formula_moiety          ?
_chemical_formula_sum
  'C32 H36 Cu2 Mo5 N6 O26 P2'
_chemical_formula_weight          1589.39
 
loop_
  _atom_type_symbol
  _atom_type_description
  _atom_type_scat_dispersion_real
  _atom_type_scat_dispersion_imag
  _atom_type_scat_source
  'C'  'C'   0.0033   0.0016
  'International Tables Vol C Tables 4.2.6.8 and 6.1.1.4'
  'H'  'H'   0.0000   0.0000
  'International Tables Vol C Tables 4.2.6.8 and 6.1.1.4'
  'N'  'N'   0.0061   0.0033
  'International Tables Vol C Tables 4.2.6.8 and 6.1.1.4'
  'O'  'O'   0.0106   0.0060
  'International Tables Vol C Tables 4.2.6.8 and 6.1.1.4'
  'P'  'P'   0.1023   0.0942
  'International Tables Vol C Tables 4.2.6.8 and 6.1.1.4'
  'Cu'  'Cu'   0.3201   1.2651
  'International Tables Vol C Tables 4.2.6.8 and 6.1.1.4'
  'Mo'  'Mo'  -1.6832   0.6857
  'International Tables Vol C Tables 4.2.6.8 and 6.1.1.4'
 
_symmetry_cell_setting            Monoclinic
_symmetry_space_group_name_H-M    C2/c
 
loop_
  _symmetry_equiv_pos_as_xyz
  'x, y, z'
  '-x, y, -z+1/2'
  'x+1/2, y+1/2, z'
  '-x+1/2, y+1/2, -z+1/2'
  '-x, -y, -z'
  'x, -y, z-1/2'
  '-x+1/2, -y+1/2, -z'
  'x+1/2, -y+1/2, z-1/2'
 
_cell_length_a                    16.4943(12)
_cell_length_b                    21.5003(15)
_cell_length_c                    14.8433(11)
_cell_angle_alpha                 90.00
_cell_angle_beta                  121.1280(10)
_cell_angle_gamma                 90.00
_cell_volume                      4506.0(6)
_cell_formula_units_Z             4
_cell_measurement_temperature     293(2)
_cell_measurement_reflns_used     ?
_cell_measurement_theta_min       ?
_cell_measurement_theta_max       ?
 
_exptl_crystal_description        Needle
_exptl_crystal_colour             Dark blue
_exptl_crystal_size_max           0.26
_exptl_crystal_size_mid           0.18
_exptl_crystal_size_min           0.12
_exptl_crystal_density_meas       ?
_exptl_crystal_density_diffrn     2.343
_exptl_crystal_density_method     'not measured'
_exptl_crystal_F_000              3104
_exptl_absorpt_coefficient_mu     2.444
_exptl_absorpt_correction_type    SADABS
_exptl_absorpt_correction_T_min   ?
_exptl_absorpt_correction_T_max   ?
_exptl_absorpt_process_details    ?
 
_exptl_special_details
;
  ?
;
 
_diffrn_ambient_temperature       293(2)
_diffrn_radiation_wavelength      0.71073
_diffrn_radiation_type            MoK\a
_diffrn_radiation_source          'fine-focus sealed tube'
_diffrn_radiation_monochromator   graphite
_diffrn_measurement_device_type   ?
_diffrn_measurement_method        ?
_diffrn_detector_area_resol_mean  ?
_diffrn_standards_number          ?
_diffrn_standards_interval_count  ?
_diffrn_standards_interval_time   ?
_diffrn_standards_decay_%         ?
_diffrn_reflns_number             14985
_diffrn_reflns_av_R_equivalents   0.0873
_diffrn_reflns_av_sigmaI/netI     0.1067
_diffrn_reflns_limit_h_min        -20
_diffrn_reflns_limit_h_max        21
_diffrn_reflns_limit_k_min        -28
_diffrn_reflns_limit_k_max        28
_diffrn_reflns_limit_l_min        -17
_diffrn_reflns_limit_l_max        19
_diffrn_reflns_theta_min          1.73
_diffrn_reflns_theta_max          28.28
_reflns_number_total              5433
_reflns_number_gt                 2873
_reflns_threshold_expression      >2sigma(I)
 
_computing_data_collection        ?
_computing_cell_refinement        ?
_computing_data_reduction         ?
_computing_structure_solution     'SHELXS-97 (Sheldrick, 1990)'
_computing_structure_refinement   'SHELXL-97 (Sheldrick, 1997)'
_computing_molecular_graphics     ?
_computing_publication_material   ?
 
_refine_special_details
;
  Refinement of F^2^ against ALL reflections.  The weighted R-factor wR and
  goodness of fit S are based on F^2^, conventional R-factors R are based
  on F, with F set to zero for negative F^2^. The threshold expression of
  F^2^ > 2sigma(F^2^) is used only for calculating R-factors(gt) etc. and is
  not relevant to the choice of reflections for refinement.  R-factors based
  on F^2^ are statistically about twice as large as those based on F, and R-
  factors based on ALL data will be even larger.
;
 
_refine_ls_structure_factor_coef  Fsqd
_refine_ls_matrix_type            full
_refine_ls_weighting_scheme       calc
_refine_ls_weighting_details
  'calc w=1/[\s^2^(Fo^2^)+(0.1151P)^2^+0.0000P] where P=(Fo^2^+2Fc^2^)/3'
_atom_sites_solution_primary      direct
_atom_sites_solution_secondary    difmap
_atom_sites_solution_hydrogens    geom
_refine_ls_hydrogen_treatment     mixed
_refine_ls_extinction_method      SHELXL
_refine_ls_extinction_coef        0.00102(14)
_refine_ls_extinction_expression
  'Fc^*^=kFc[1+0.001xFc^2^\l^3^/sin(2\q)]^-1/4^'
_refine_ls_number_reflns          5433
_refine_ls_number_parameters      342
_refine_ls_number_restraints      0
_refine_ls_R_factor_all           0.1251
_refine_ls_R_factor_gt            0.0698
_refine_ls_wR_factor_ref          0.1801
_refine_ls_wR_factor_gt           0.1873
_refine_ls_goodness_of_fit_ref    1.033
_refine_ls_restrained_S_all       1.033
_refine_ls_shift/su_max           0.002
_refine_ls_shift/su_mean          0.001
 
loop_
  _atom_site_label
  _atom_site_type_symbol
  _atom_site_fract_x
  _atom_site_fract_y
  _atom_site_fract_z
  _atom_site_U_iso_or_equiv
  _atom_site_adp_type
  _atom_site_occupancy
  _atom_site_symmetry_multiplicity
  _atom_site_calc_flag
  _atom_site_refinement_flags
  _atom_site_disorder_assembly
  _atom_site_disorder_group
Mo1 Mo 0.98646(7) 0.20378(4) 0.92725(8) 0.0177(3) Uani 1 1 d . . .
Mo2 Mo 0.96820(7) 0.35398(4) 0.85154(8) 0.0199(3) Uani 1 1 d . . .
Mo3 Mo 1.0000 0.11133(6) 0.7500 0.0178(3) Uani 1 2 d S . .
Cu1 Cu 0.76556(14) 0.13727(9) 0.87514(19) 0.0582(6) Uani 1 1 d . . .
P1 P 0.86931(19) 0.24835(13) 0.6624(2) 0.0156(6) Uani 1 1 d . . .
O1 O 0.7264(6) 0.1311(4) 0.7036(7) 0.033(2) Uani 1 1 d . . .
O2 O 0.8934(5) 0.1625(4) 0.9228(7) 0.0238(18) Uani 1 1 d . . .
O3 O 1.0439(5) 0.1384(3) 0.8904(6) 0.0163(16) Uani 1 1 d . . .
O4 O 0.9107(5) 0.0623(4) 0.7273(6) 0.0278(19) Uani 1 1 d . . .
O5 O 0.8993(5) 0.1925(3) 0.7388(6) 0.0156(16) Uani 1 1 d . . .
O6 O 1.0703(6) 0.2062(4) 1.0573(6) 0.0270(19) Uani 1 1 d . . .
O7 O 1.0563(5) 0.2626(3) 0.8691(5) 0.0149(16) Uani 1 1 d . . .
O8 O 0.9345(5) 0.2847(3) 0.9123(6) 0.0223(18) Uani 1 1 d . . .
O9 O 0.8509(5) 0.3070(3) 0.7067(6) 0.0164(16) Uani 1 1 d . . .
O10 O 0.8881(6) 0.4083(4) 0.8395(6) 0.0270(19) Uani 1 1 d . . .
O11 O 1.0690(6) 0.3779(4) 0.9614(7) 0.031(2) Uani 1 1 d . . .
O12 O 1.0000 0.3786(5) 0.7500 0.024(3) Uani 1 2 d S . .
O100 O 0.2815(12) 1.0146(10) 0.8567(14) 0.037(7) Uani 0.53(4) 1 d P . .
O99 O 0.244(2) 0.9743(15) 0.866(2) 0.065(11) Uani 0.47(4) 1 d P . .
N1 N 0.6983(8) 0.2221(5) 0.8472(12) 0.037(4) Uani 1 1 d . . .
N2 N 0.6629(8) 0.1098(5) 0.8816(8) 0.033(3) Uani 1 1 d . . .
N3 N 0.7982(8) 0.0438(5) 0.8991(8) 0.034(3) Uani 1 1 d . . .
C1 C 0.7267(11) 0.2771(6) 0.8304(17) 0.039(6) Uani 1 1 d . . .
H1 H 0.7727 0.2785 0.8120 0.083 Uiso 1 1 calc R . .
C2 C 0.6886(9) 0.3300(6) 0.8402(11) 0.037(3) Uani 1 1 d . . .
H2 H 0.7102 0.3686 0.8332 0.045 Uiso 1 1 calc R . .
C3 C 0.6165(13) 0.3253(7) 0.8608(14) 0.032(5) Uani 1 1 d . . .
H3 H 0.5882 0.3614 0.8664 0.074 Uiso 1 1 calc R . .
C4 C 0.5852(13) 0.2683(7) 0.8736(14) 0.030(5) Uani 1 1 d . . .
H4 H 0.5355 0.2655 0.8860 0.072 Uiso 1 1 calc R . .
C5 C 0.6288(9) 0.2172(6) 0.8674(10) 0.033(3) Uani 1 1 d . . .
C6 C 0.6060(9) 0.1540(6) 0.8795(10) 0.035(3) Uani 1 1 d . . .
C7 C 0.5232(10) 0.1362(7) 0.8871(11) 0.044(4) Uani 1 1 d . . .
H7 H 0.4807 0.1656 0.8846 0.053 Uiso 1 1 calc R . .
C8 C 0.5124(10) 0.0719(7) 0.8983(10) 0.038(3) Uani 1 1 d . . .
H8 H 0.4623 0.0581 0.9050 0.046 Uiso 1 1 calc R . .
C9 C 0.5750(9) 0.0299(6) 0.8994(10) 0.034(3) Uani 1 1 d . . .
H9 H 0.5665 -0.0124 0.9047 0.041 Uiso 1 1 calc R . .
C10 C 0.6519(9) 0.0505(6) 0.8925(9) 0.031(3) Uani 1 1 d . . .
C11 C 0.7284(9) 0.0099(6) 0.8979(10) 0.028(3) Uani 1 1 d . . .
C12 C 0.7288(9) -0.0552(6) 0.8970(10) 0.031(3) Uani 1 1 d . . .
H12 H 0.6800 -0.0779 0.8953 0.037 Uiso 1 1 calc R . .
C13 C 0.8045(8) -0.0846(6) 0.8989(10) 0.034(3) Uani 1 1 d . . .
H13 H 0.8066 -0.1278 0.8983 0.040 Uiso 1 1 calc R . .
C14 C 0.8761(8) -0.0511(6) 0.9016(9) 0.031(3) Uani 1 1 d . . .
H14 H 0.9262 -0.0714 0.9023 0.037 Uiso 1 1 calc R . .
C15 C 0.8734(10) 0.0130(7) 0.9034(10) 0.039(4) Uani 1 1 d . . .
H15 H 0.9231 0.0358 0.9075 0.047 Uiso 1 1 calc R . .
C16 C 0.7629(8) 0.2266(5) 0.5443(8) 0.018(2) Uani 1 1 d . . .
H16A H 0.7710 0.1858 0.5222 0.022 Uiso 1 1 calc R . .
H16B H 0.7114 0.2241 0.5579 0.022 Uiso 1 1 calc R . .
O98 O 0.5000 0.4473(13) 0.7500 0.27(2) Uani 1 2 d S . .
 
loop_
  _atom_site_aniso_label
  _atom_site_aniso_U_11
  _atom_site_aniso_U_22
  _atom_site_aniso_U_33
  _atom_site_aniso_U_23
  _atom_site_aniso_U_13
  _atom_site_aniso_U_12
Mo1 0.0132(5) 0.0268(5) 0.0144(5) 0.0008(4) 0.0080(4) -0.0019(4)
Mo2 0.0183(5) 0.0218(5) 0.0214(6) -0.0058(4) 0.0115(5) -0.0020(4)
Mo3 0.0129(7) 0.0233(7) 0.0186(8) 0.000 0.0090(6) 0.000
Cu1 0.0434(12) 0.0608(13) 0.0766(17) 0.0023(12) 0.0353(12) -0.0019(10)
P1 0.0102(13) 0.0224(15) 0.0132(15) -0.0009(12) 0.0053(12) 0.0018(11)
O1 0.023(5) 0.041(5) 0.035(6) 0.015(4) 0.014(4) 0.004(4)
O2 0.014(4) 0.029(4) 0.030(5) 0.002(4) 0.012(4) -0.004(3)
O3 0.012(4) 0.022(4) 0.015(4) 0.003(3) 0.007(3) -0.004(3)
O4 0.023(4) 0.035(5) 0.029(5) -0.007(4) 0.016(4) -0.009(4)
O5 0.008(4) 0.023(4) 0.012(4) 0.001(3) 0.002(3) 0.000(3)
O6 0.024(4) 0.042(5) 0.018(5) 0.000(4) 0.013(4) -0.005(4)
O7 0.009(4) 0.022(4) 0.012(4) -0.001(3) 0.004(3) -0.007(3)
O8 0.018(4) 0.029(4) 0.023(5) -0.001(4) 0.012(4) 0.000(3)
O9 0.005(3) 0.018(4) 0.025(5) -0.003(3) 0.007(3) 0.004(3)
O10 0.032(5) 0.028(4) 0.028(5) -0.005(4) 0.020(4) 0.001(4)
O11 0.030(5) 0.029(5) 0.036(5) -0.012(4) 0.018(4) -0.007(4)
O12 0.026(6) 0.014(5) 0.036(7) 0.000 0.018(6) 0.000
O100 0.023(10) 0.036(13) 0.034(11) -0.002(9) 0.003(8) -0.002(8)
O99 0.063(19) 0.06(2) 0.056(18) 0.000(14) 0.022(15) 0.005(16)
N1 0.028(7) 0.027(6) 0.122(13) -0.013(7) 0.043(8) -0.004(5)
N2 0.029(6) 0.036(6) 0.022(6) -0.004(5) 0.006(5) -0.009(5)
N3 0.032(6) 0.036(6) 0.030(7) 0.001(5) 0.013(5) -0.011(5)
C1 0.040(9) 0.023(7) 0.16(2) 0.013(10) 0.068(12) 0.006(6)
C2 0.032(8) 0.025(7) 0.047(9) -0.007(7) 0.015(7) -0.003(6)
C3 0.103(15) 0.042(9) 0.063(12) -0.005(9) 0.058(12) 0.013(9)
C4 0.101(14) 0.046(9) 0.086(14) -0.024(9) 0.086(13) -0.019(9)
C5 0.023(7) 0.041(8) 0.023(7) -0.003(6) 0.002(6) 0.000(6)
C6 0.028(7) 0.048(8) 0.017(7) -0.007(6) 0.004(6) -0.006(6)
C7 0.037(9) 0.063(10) 0.019(8) -0.005(7) 0.006(7) -0.009(7)
C8 0.040(8) 0.057(9) 0.017(7) -0.007(7) 0.015(7) -0.019(7)
C9 0.033(8) 0.040(8) 0.022(7) -0.003(6) 0.009(6) -0.006(6)
C10 0.026(7) 0.039(8) 0.015(7) -0.002(6) 0.001(6) -0.013(6)
C11 0.029(7) 0.029(7) 0.027(7) 0.002(6) 0.014(6) -0.011(5)
C12 0.026(7) 0.034(7) 0.032(8) 0.006(6) 0.014(6) -0.005(5)
C13 0.021(7) 0.042(8) 0.022(7) 0.011(6) -0.001(6) -0.011(6)
C14 0.021(7) 0.039(8) 0.021(7) 0.016(6) 0.003(6) -0.003(5)
C15 0.039(8) 0.052(9) 0.018(7) 0.011(6) 0.009(7) -0.022(7)
C16 0.019(6) 0.019(6) 0.016(6) 0.000(5) 0.007(5) 0.005(5)
O98 0.38(5) 0.10(2) 0.54(8) 0.000 0.39(6) 0.000
 
_geom_special_details
;
  All esds (except the esd in the dihedral angle between two l.s. planes)
  are estimated using the full covariance matrix.  The cell esds are taken
  into account individually in the estimation of esds in distances, angles
  and torsion angles; correlations between esds in cell parameters are only
  used when they are defined by crystal symmetry.  An approximate (isotropic)
  treatment of cell esds is used for estimating esds involving l.s. planes.
;
 
loop_
  _geom_bond_atom_site_label_1
  _geom_bond_atom_site_label_2
  _geom_bond_distance
  _geom_bond_site_symmetry_2
  _geom_bond_publ_flag
Mo1 O6 1.698(8) . ?
Mo1 O2 1.745(7) . ?
Mo1 O8 1.900(7) . ?
Mo1 O3 1.925(7) . ?
Mo1 O7 2.168(7) . ?
Mo1 O5 2.407(7) . ?
Mo2 O11 1.699(8) . ?
Mo2 O10 1.702(8) . ?
Mo2 O12 1.909(3) . ?
Mo2 O8 1.965(7) . ?
Mo2 O9 2.255(7) . ?
Mo2 O7 2.378(7) . ?
Mo3 O4 1.698(7) . ?
Mo3 O4 1.698(7) 2_756 ?
Mo3 O3 1.910(7) . ?
Mo3 O3 1.910(7) 2_756 ?
Mo3 O5 2.355(7) 2_756 ?
Mo3 O5 2.355(7) . ?
Cu1 N2 1.842(11) . ?
Cu1 O2 1.923(7) . ?
Cu1 N1 2.063(11) . ?
Cu1 N3 2.064(11) . ?
Cu1 O1 2.284(9) . ?
P1 O9 1.523(7) . ?
P1 O5 1.546(7) . ?
P1 O7 1.552(7) 2_756 ?
P1 C16 1.787(11) . ?
O7 P1 1.552(7) 2_756 ?
O12 Mo2 1.909(3) 2_756 ?
O100 O99 1.11(3) . ?
N1 C5 1.331(17) . ?
N1 C1 1.341(17) . ?
N2 C10 1.309(15) . ?
N2 C6 1.324(16) . ?
N3 C11 1.354(14) . ?
N3 C15 1.379(17) . ?
C1 C2 1.345(18) . ?
C2 C3 1.38(2) . ?
C3 C4 1.38(2) . ?
C4 C5 1.342(18) . ?
C5 C6 1.445(18) . ?
C6 C7 1.477(19) . ?
C7 C8 1.416(19) . ?
C8 C9 1.367(18) . ?
C9 C10 1.396(17) . ?
C10 C11 1.503(18) . ?
C11 C12 1.398(17) . ?
C12 C13 1.387(17) . ?
C13 C14 1.364(16) . ?
C14 C15 1.381(18) . ?
C16 C16 1.53(2) 7_656 ?
 
loop_
  _geom_angle_atom_site_label_1
  _geom_angle_atom_site_label_2
  _geom_angle_atom_site_label_3
  _geom_angle
  _geom_angle_site_symmetry_1
  _geom_angle_site_symmetry_3
  _geom_angle_publ_flag
O6 Mo1 O2 104.0(4) . . ?
O6 Mo1 O8 99.0(4) . . ?
O2 Mo1 O8 97.3(3) . . ?
O6 Mo1 O3 96.6(3) . . ?
O2 Mo1 O3 99.8(3) . . ?
O8 Mo1 O3 153.3(3) . . ?
O6 Mo1 O7 98.4(3) . . ?
O2 Mo1 O7 156.9(3) . . ?
O8 Mo1 O7 73.8(3) . . ?
O3 Mo1 O7 82.6(3) . . ?
O6 Mo1 O5 166.1(3) . . ?
O2 Mo1 O5 85.4(3) . . ?
O8 Mo1 O5 89.7(3) . . ?
O3 Mo1 O5 71.5(3) . . ?
O7 Mo1 O5 73.5(2) . . ?
O11 Mo2 O10 102.4(4) . . ?
O11 Mo2 O12 98.2(3) . . ?
O10 Mo2 O12 104.0(4) . . ?
O11 Mo2 O8 99.1(4) . . ?
O10 Mo2 O8 100.3(3) . . ?
O12 Mo2 O8 146.2(4) . . ?
O11 Mo2 O9 169.3(3) . . ?
O10 Mo2 O9 88.3(3) . . ?
O12 Mo2 O9 79.8(2) . . ?
O8 Mo2 O9 77.9(3) . . ?
O11 Mo2 O7 84.6(3) . . ?
O10 Mo2 O7 167.4(3) . . ?
O12 Mo2 O7 85.1(3) . . ?
O8 Mo2 O7 68.0(3) . . ?
O9 Mo2 O7 84.8(2) . . ?
O4 Mo3 O4 103.2(5) . 2_756 ?
O4 Mo3 O3 101.9(3) . . ?
O4 Mo3 O3 99.9(3) 2_756 . ?
O4 Mo3 O3 99.9(3) . 2_756 ?
O4 Mo3 O3 101.9(3) 2_756 2_756 ?
O3 Mo3 O3 144.5(4) . 2_756 ?
O4 Mo3 O5 169.1(3) . 2_756 ?
O4 Mo3 O5 86.5(3) 2_756 2_756 ?
O3 Mo3 O5 80.9(3) . 2_756 ?
O3 Mo3 O5 72.9(3) 2_756 2_756 ?
O4 Mo3 O5 86.5(3) . . ?
O4 Mo3 O5 169.1(3) 2_756 . ?
O3 Mo3 O5 72.9(3) . . ?
O3 Mo3 O5 80.9(3) 2_756 . ?
O5 Mo3 O5 84.3(3) 2_756 . ?
N2 Cu1 O2 159.0(4) . . ?
N2 Cu1 N1 83.1(5) . . ?
O2 Cu1 N1 101.4(4) . . ?
N2 Cu1 N3 81.0(5) . . ?
O2 Cu1 N3 94.2(4) . . ?
N1 Cu1 N3 164.0(4) . . ?
N2 Cu1 O1 107.5(4) . . ?
O2 Cu1 O1 92.9(3) . . ?
N1 Cu1 O1 90.9(5) . . ?
N3 Cu1 O1 91.9(4) . . ?
O9 P1 O5 112.7(4) . . ?
O9 P1 O7 109.4(4) . 2_756 ?
O5 P1 O7 111.7(4) . 2_756 ?
O9 P1 C16 109.1(4) . . ?
O5 P1 C16 107.2(4) . . ?
O7 P1 C16 106.5(5) 2_756 . ?
Mo1 O2 Cu1 159.0(5) . . ?
Mo3 O3 Mo1 124.6(4) . . ?
P1 O5 Mo3 125.0(4) . . ?
P1 O5 Mo1 123.2(4) . . ?
Mo3 O5 Mo1 91.0(2) . . ?
P1 O7 Mo1 132.1(4) 2_756 . ?
P1 O7 Mo2 131.5(4) 2_756 . ?
Mo1 O7 Mo2 96.0(2) . . ?
Mo1 O8 Mo2 122.0(4) . . ?
P1 O9 Mo2 121.2(4) . . ?
Mo2 O12 Mo2 147.7(6) . 2_756 ?
C5 N1 C1 122.5(12) . . ?
C5 N1 Cu1 108.7(9) . . ?
C1 N1 Cu1 127.8(9) . . ?
C10 N2 C6 124.1(12) . . ?
C10 N2 Cu1 120.5(10) . . ?
C6 N2 Cu1 115.3(9) . . ?
C11 N3 C15 118.7(11) . . ?
C11 N3 Cu1 112.2(8) . . ?
C15 N3 Cu1 128.5(8) . . ?
N1 C1 C2 119.8(14) . . ?
C1 C2 C3 117.9(14) . . ?
C2 C3 C4 121.6(14) . . ?
C5 C4 C3 117.8(14) . . ?
N1 C5 C4 120.2(13) . . ?
N1 C5 C6 114.3(12) . . ?
C4 C5 C6 125.4(13) . . ?
N2 C6 C5 116.8(12) . . ?
N2 C6 C7 118.9(13) . . ?
C5 C6 C7 124.2(13) . . ?
C8 C7 C6 116.1(14) . . ?
C9 C8 C7 120.4(13) . . ?
C8 C9 C10 119.9(13) . . ?
N2 C10 C9 120.5(13) . . ?
N2 C10 C11 114.0(11) . . ?
C9 C10 C11 125.5(11) . . ?
N3 C11 C12 122.1(12) . . ?
N3 C11 C10 111.8(10) . . ?
C12 C11 C10 126.0(11) . . ?
C13 C12 C11 117.6(11) . . ?
C14 C13 C12 121.1(13) . . ?
C13 C14 C15 119.4(13) . . ?
N3 C15 C14 121.0(11) . . ?
C16 C16 P1 111.5(10) 7_656 . ?
 
_diffrn_measured_fraction_theta_max    0.971
_diffrn_reflns_theta_full              28.28
_diffrn_measured_fraction_theta_full   0.971
_refine_diff_density_max    1.196
_refine_diff_density_min   -1.101
_refine_diff_density_rms    0.027

#===END

data_c2-c
 
_audit_creation_method            SHELXL-97
_chemical_name_systematic
;
  ?
;
_chemical_name_common             ?
_chemical_melting_point           ?
_chemical_formula_moiety          ?
_chemical_formula_sum
  'C33 H28 Cu2 Mo5 N6 O21 P2'
_chemical_formula_weight          1513.33
 
loop_
  _atom_type_symbol
  _atom_type_description
  _atom_type_scat_dispersion_real
  _atom_type_scat_dispersion_imag
  _atom_type_scat_source
  'C'  'C'   0.0033   0.0016
  'International Tables Vol C Tables 4.2.6.8 and 6.1.1.4'
  'H'  'H'   0.0000   0.0000
  'International Tables Vol C Tables 4.2.6.8 and 6.1.1.4'
  'N'  'N'   0.0061   0.0033
  'International Tables Vol C Tables 4.2.6.8 and 6.1.1.4'
  'O'  'O'   0.0106   0.0060
  'International Tables Vol C Tables 4.2.6.8 and 6.1.1.4'
  'P'  'P'   0.1023   0.0942
  'International Tables Vol C Tables 4.2.6.8 and 6.1.1.4'
  'Mo'  'Mo'  -1.6832   0.6857
  'International Tables Vol C Tables 4.2.6.8 and 6.1.1.4'
  'Cu'  'Cu'   0.3201   1.2651
  'International Tables Vol C Tables 4.2.6.8 and 6.1.1.4'
 
_symmetry_cell_setting            Monoclinic
_symmetry_space_group_name_H-M    C2/c
 
loop_
  _symmetry_equiv_pos_as_xyz
  'x, y, z'
  '-x, y, -z+1/2'
  'x+1/2, y+1/2, z'
  '-x+1/2, y+1/2, -z+1/2'
  '-x, -y, -z'
  'x, -y, z-1/2'
  '-x+1/2, -y+1/2, -z'
  'x+1/2, -y+1/2, z-1/2'
 
_cell_length_a                    8.7047(6)
_cell_length_b                    23.3712(18)
_cell_length_c                    19.7186(15)
_cell_angle_alpha                 90.00
_cell_angle_beta                  101.409(1)
_cell_angle_gamma                 90.00
_cell_volume                      3932.3(5)
_cell_formula_units_Z             4
_cell_measurement_temperature     293(2)
_cell_measurement_reflns_used     ?
_cell_measurement_theta_min       ?
_cell_measurement_theta_max       ?
 
_exptl_crystal_description        Block
_exptl_crystal_colour             Plate
_exptl_crystal_size_max           0.23
_exptl_crystal_size_mid           0.17
_exptl_crystal_size_min           0.04
_exptl_crystal_density_meas       ?
_exptl_crystal_density_diffrn     2.556
_exptl_crystal_density_method     'not measured'
_exptl_crystal_F_000              2936
_exptl_absorpt_coefficient_mu     2.785
_exptl_absorpt_correction_type    SADABS
_exptl_absorpt_correction_T_min   ?
_exptl_absorpt_correction_T_max   ?
_exptl_absorpt_process_details    ?
 
_exptl_special_details
;
  ?
;
 
_diffrn_ambient_temperature       293(2)
_diffrn_radiation_wavelength      0.71073
_diffrn_radiation_type            MoK\a
_diffrn_radiation_source          'fine-focus sealed tube'
_diffrn_radiation_monochromator   graphite
_diffrn_measurement_device_type   ?
_diffrn_measurement_method        ?
_diffrn_detector_area_resol_mean  ?
_diffrn_standards_number          ?
_diffrn_standards_interval_count  ?
_diffrn_standards_interval_time   ?
_diffrn_standards_decay_%         ?
_diffrn_reflns_number             13087
_diffrn_reflns_av_R_equivalents   0.0946
_diffrn_reflns_av_sigmaI/netI     0.1171
_diffrn_reflns_limit_h_min        -8
_diffrn_reflns_limit_h_max        11
_diffrn_reflns_limit_k_min        -22
_diffrn_reflns_limit_k_max        31
_diffrn_reflns_limit_l_min        -26
_diffrn_reflns_limit_l_max        25
_diffrn_reflns_theta_min          2.04
_diffrn_reflns_theta_max          28.29
_reflns_number_total              4795
_reflns_number_gt                 2841
_reflns_threshold_expression      >2sigma(I)
 
_computing_data_collection        ?
_computing_cell_refinement        ?
_computing_data_reduction         ?
_computing_structure_solution     'SHELXS-97 (Sheldrick, 1990)'
_computing_structure_refinement   'SHELXL-97 (Sheldrick, 1997)'
_computing_molecular_graphics     ?
_computing_publication_material   ?
 
_refine_special_details
;
  Refinement of F^2^ against ALL reflections.  The weighted R-factor wR and
  goodness of fit S are based on F^2^, conventional R-factors R are based
  on F, with F set to zero for negative F^2^. The threshold expression of
  F^2^ > 2sigma(F^2^) is used only for calculating R-factors(gt) etc. and is
  not relevant to the choice of reflections for refinement.  R-factors based
  on F^2^ are statistically about twice as large as those based on F, and R-
  factors based on ALL data will be even larger.
;
 
_refine_ls_structure_factor_coef  Fsqd
_refine_ls_matrix_type            full
_refine_ls_weighting_scheme       calc
_refine_ls_weighting_details
  'calc w=1/[\s^2^(Fo^2^)+(0.0367P)^2^+0.0000P] where P=(Fo^2^+2Fc^2^)/3'
_atom_sites_solution_primary      direct
_atom_sites_solution_secondary    difmap
_atom_sites_solution_hydrogens    geom
_refine_ls_hydrogen_treatment     mixed
_refine_ls_extinction_method      none
_refine_ls_extinction_coef        ?
_refine_ls_number_reflns          4795
_refine_ls_number_parameters      313
_refine_ls_number_restraints      0
_refine_ls_R_factor_all           0.1172
_refine_ls_R_factor_gt            0.0507
_refine_ls_wR_factor_ref          0.1044
_refine_ls_wR_factor_gt           0.0891
_refine_ls_goodness_of_fit_ref    0.965
_refine_ls_restrained_S_all       0.965
_refine_ls_shift/su_max           0.001
_refine_ls_shift/su_mean          0.000
 
loop_
  _atom_site_label
  _atom_site_type_symbol
  _atom_site_fract_x
  _atom_site_fract_y
  _atom_site_fract_z
  _atom_site_U_iso_or_equiv
  _atom_site_adp_type
  _atom_site_occupancy
  _atom_site_symmetry_multiplicity
  _atom_site_calc_flag
  _atom_site_refinement_flags
  _atom_site_disorder_assembly
  _atom_site_disorder_group
Mo1 Mo 0.5000 0.17841(4) 0.2500 0.0065(2) Uani 1 2 d S . .
Mo2 Mo 0.29636(7) 0.26067(3) 0.12289(3) 0.00609(15) Uani 1 1 d . . .
Mo3 Mo 0.39990(7) 0.40221(3) 0.15984(3) 0.00696(15) Uani 1 1 d . . .
Cu1 Cu 0.23376(10) 0.13593(4) 0.00533(5) 0.0106(2) Uani 1 1 d . . .
P1 P 0.3292(2) 0.30540(9) 0.28974(10) 0.0069(4) Uani 1 1 d . . .
O1 O 0.3475(5) 0.2211(2) 0.0574(2) 0.0087(11) Uani 1 1 d . . .
O2 O 0.3070(5) 0.2030(2) 0.1921(2) 0.0077(11) Uani 1 1 d . . .
O3 O 0.0986(5) 0.2649(2) 0.1020(2) 0.0092(11) Uani 1 1 d . . .
O4 O 0.3390(5) 0.3385(2) 0.0901(2) 0.0062(11) Uani 1 1 d . . .
O5 O 0.3338(5) 0.3198(2) 0.2128(2) 0.0073(11) Uani 1 1 d . . .
O6 O 0.5616(5) 0.2550(2) 0.1830(2) 0.0049(10) Uani 1 1 d . . .
O7 O 0.5764(6) 0.1334(2) 0.1976(3) 0.0132(12) Uani 1 1 d . . .
O8 O 0.2152(5) 0.4260(2) 0.1642(2) 0.0100(11) Uani 1 1 d . . .
O9 O 0.5000 0.4265(3) 0.2500 0.0100(16) Uani 1 2 d S . .
O10 O 0.4551(6) 0.4497(2) 0.1039(3) 0.0118(12) Uani 1 1 d . . .
O11 O 0.6269(5) 0.3582(2) 0.1664(2) 0.0084(11) Uani 1 1 d . . .
N1 N 0.0295(7) 0.1486(3) 0.0353(3) 0.0117(14) Uani 1 1 d . . .
N2 N 0.2703(7) 0.0905(3) 0.0891(3) 0.0114(14) Uani 1 1 d . . .
N3 N 0.4447(7) 0.1003(3) -0.0001(3) 0.0115(14) Uani 1 1 d . . .
C1 C -0.0891(9) 0.1785(4) 0.0030(4) 0.0157(18) Uani 1 1 d . . .
H1 H -0.0852 0.1936 -0.0403 0.019 Uiso 1 1 calc R . .
C2 C -0.2224(9) 0.1886(3) 0.0312(4) 0.020(2) Uani 1 1 d . . .
H2 H -0.3071 0.2086 0.0059 0.024 Uiso 1 1 calc R . .
C3 C -0.2269(9) 0.1691(4) 0.0961(4) 0.022(2) Uani 1 1 d . . .
H3 H -0.3120 0.1772 0.1165 0.027 Uiso 1 1 calc R . .
C4 C -0.1019(9) 0.1368(4) 0.1308(4) 0.024(2) Uani 1 1 d . . .
H4 H -0.1009 0.1230 0.1751 0.029 Uiso 1 1 calc R . .
C5 C 0.0206(9) 0.1257(3) 0.0979(4) 0.0127(17) Uani 1 1 d . . .
C6 C 0.1551(8) 0.0877(3) 0.1265(4) 0.0124(17) Uani 1 1 d . . .
C7 C 0.1667(10) 0.0486(4) 0.1802(4) 0.022(2) Uani 1 1 d . . .
H7 H 0.0875 0.0460 0.2055 0.027 Uiso 1 1 calc R . .
C8 C 0.2970(9) 0.0136(4) 0.1957(4) 0.023(2) Uani 1 1 d . . .
H8 H 0.3060 -0.0128 0.2315 0.027 Uiso 1 1 calc R . .
C9 C 0.4142(9) 0.0182(3) 0.1576(4) 0.0177(19) Uani 1 1 d . . .
H9 H 0.5036 -0.0044 0.1681 0.021 Uiso 1 1 calc R . .
C10 C 0.3961(9) 0.0571(3) 0.1035(4) 0.0144(18) Uani 1 1 d . . .
C11 C 0.5007(8) 0.0643(3) 0.0531(4) 0.0129(17) Uani 1 1 d . . .
C12 C 0.6443(9) 0.0362(3) 0.0590(4) 0.0178(19) Uani 1 1 d . . .
H12 H 0.6825 0.0126 0.0965 0.021 Uiso 1 1 calc R . .
C13 C 0.7287(9) 0.0449(3) 0.0062(4) 0.0156(18) Uani 1 1 d . . .
H13 H 0.8235 0.0261 0.0078 0.019 Uiso 1 1 calc R . .
C14 C 0.6717(8) 0.0810(3) -0.0478(4) 0.0136(18) Uani 1 1 d . . .
H14 H 0.7268 0.0867 -0.0831 0.016 Uiso 1 1 calc R . .
C15 C 0.5299(9) 0.1089(3) -0.0487(4) 0.0143(18) Uani 1 1 d . . .
H15 H 0.4931 0.1344 -0.0844 0.017 Uiso 1 1 calc R . .
C16 C 0.1339(8) 0.2818(3) 0.2892(4) 0.0100(16) Uani 1 1 d . . .
H16A H 0.1221 0.2437 0.2692 0.012 Uiso 1 1 calc R . .
H16B H 0.1211 0.2785 0.3368 0.012 Uiso 1 1 calc R . .
C17 C 0.0000 0.3195(5) 0.2500 0.012(2) Uani 1 2 d S . .
H17A H -0.0394 0.3438 0.2825 0.014 Uiso 0.50 1 calc PR . .
H17B H 0.0394 0.3438 0.2175 0.014 Uiso 0.50 1 calc PR . .
 
loop_
  _atom_site_aniso_label
  _atom_site_aniso_U_11
  _atom_site_aniso_U_22
  _atom_site_aniso_U_33
  _atom_site_aniso_U_23
  _atom_site_aniso_U_13
  _atom_site_aniso_U_12
Mo1 0.0071(5) 0.0072(5) 0.0047(5) 0.000 0.0002(4) 0.000
Mo2 0.0051(3) 0.0071(3) 0.0057(3) 0.0002(3) 0.0002(2) -0.0005(3)
Mo3 0.0058(3) 0.0072(4) 0.0072(3) 0.0009(3) -0.0003(2) -0.0001(3)
Cu1 0.0096(5) 0.0121(6) 0.0101(5) 0.0012(4) 0.0020(4) 0.0010(4)
P1 0.0049(9) 0.0101(11) 0.0056(10) 0.0001(8) 0.0010(7) 0.0011(8)
O1 0.009(3) 0.008(3) 0.007(3) 0.000(2) -0.001(2) -0.003(2)
O2 0.009(3) 0.007(3) 0.006(3) -0.001(2) 0.000(2) -0.003(2)
O3 0.009(3) 0.009(3) 0.008(3) -0.002(2) -0.001(2) -0.002(2)
O4 0.008(3) 0.006(3) 0.005(3) 0.002(2) 0.001(2) 0.002(2)
O5 0.005(3) 0.010(3) 0.007(3) 0.006(2) 0.004(2) 0.002(2)
O6 0.003(2) 0.007(3) 0.005(2) -0.001(2) 0.0017(19) -0.003(2)
O7 0.015(3) 0.013(3) 0.011(3) -0.001(2) 0.003(2) 0.003(2)
O8 0.012(3) 0.006(3) 0.011(3) 0.000(2) -0.001(2) 0.007(2)
O9 0.011(3) 0.011(4) 0.016(4) 0.000 -0.002(3) 0.000
O10 0.012(3) 0.010(3) 0.014(3) 0.003(2) 0.003(2) 0.000(2)
O11 0.006(3) 0.015(3) 0.003(2) 0.002(2) 0.000(2) -0.001(2)
N1 0.010(3) 0.010(4) 0.014(4) -0.004(3) 0.002(3) 0.000(3)
N2 0.012(3) 0.009(4) 0.013(3) -0.003(3) 0.000(3) -0.001(3)
N3 0.014(3) 0.009(4) 0.011(3) 0.006(3) 0.001(3) 0.000(3)
C1 0.016(4) 0.021(5) 0.009(4) -0.006(4) 0.001(3) -0.003(4)
C2 0.019(5) 0.014(5) 0.028(5) -0.005(4) 0.006(4) -0.006(4)
C3 0.019(5) 0.023(5) 0.027(5) -0.007(4) 0.012(4) -0.005(4)
C4 0.024(5) 0.034(6) 0.017(5) 0.000(4) 0.012(4) -0.009(4)
C5 0.012(4) 0.014(5) 0.014(4) -0.006(4) 0.006(3) -0.007(3)
C6 0.010(4) 0.012(5) 0.013(4) 0.001(3) -0.003(3) -0.001(3)
C7 0.021(5) 0.029(6) 0.015(5) -0.006(4) -0.001(4) -0.019(4)
C8 0.025(5) 0.028(6) 0.012(4) -0.007(4) -0.005(4) -0.004(4)
C9 0.022(5) 0.010(5) 0.019(5) -0.002(4) -0.001(4) -0.003(4)
C10 0.022(5) 0.009(5) 0.009(4) -0.007(3) -0.004(3) -0.005(3)
C11 0.013(4) 0.012(5) 0.011(4) 0.003(3) -0.003(3) 0.001(3)
C12 0.025(5) 0.013(5) 0.013(4) -0.004(4) -0.001(4) -0.004(4)
C13 0.009(4) 0.010(5) 0.027(5) 0.001(4) -0.001(3) 0.006(3)
C14 0.005(4) 0.011(5) 0.025(5) 0.001(4) 0.003(3) 0.001(3)
C15 0.023(5) 0.009(5) 0.010(4) -0.006(3) 0.002(3) 0.002(3)
C16 0.010(4) 0.008(4) 0.013(4) 0.001(3) 0.005(3) -0.002(3)
C17 0.012(6) 0.008(6) 0.018(6) 0.000 0.009(5) 0.000
 
_geom_special_details
;
  All esds (except the esd in the dihedral angle between two l.s. planes)
  are estimated using the full covariance matrix.  The cell esds are taken
  into account individually in the estimation of esds in distances, angles
  and torsion angles; correlations between esds in cell parameters are only
  used when they are defined by crystal symmetry.  An approximate (isotropic)
  treatment of cell esds is used for estimating esds involving l.s. planes.
;
 
loop_
  _geom_bond_atom_site_label_1
  _geom_bond_atom_site_label_2
  _geom_bond_distance
  _geom_bond_site_symmetry_2
  _geom_bond_publ_flag
Mo1 O7 1.700(5) 2_655 ?
Mo1 O7 1.700(5) . ?
Mo1 O2 1.923(5) 2_655 ?
Mo1 O2 1.923(5) . ?
Mo1 O6 2.349(5) 2_655 ?
Mo1 O6 2.349(5) . ?
Mo2 O3 1.692(5) . ?
Mo2 O1 1.718(5) . ?
Mo2 O2 1.908(5) . ?
Mo2 O4 1.990(5) . ?
Mo2 O5 2.221(5) . ?
Mo2 O6 2.381(4) . ?
Mo3 O10 1.699(5) . ?
Mo3 O8 1.720(5) . ?
Mo3 O9 1.905(2) . ?
Mo3 O4 2.025(5) . ?
Mo3 O11 2.209(5) . ?
Mo3 O5 2.318(5) . ?
Cu1 N2 1.936(6) . ?
Cu1 O4 1.956(5) 7 ?
Cu1 N1 2.003(6) . ?
Cu1 N3 2.039(6) . ?
Cu1 O1 2.364(5) . ?
P1 O11 1.512(5) 2_655 ?
P1 O6 1.542(5) 2_655 ?
P1 O5 1.562(5) . ?
P1 C16 1.785(7) . ?
O4 Cu1 1.956(5) 7 ?
O6 P1 1.542(5) 2_655 ?
O9 Mo3 1.905(2) 2_655 ?
O11 P1 1.512(5) 2_655 ?
N1 C1 1.303(9) . ?
N1 C5 1.362(9) . ?
N2 C10 1.330(9) . ?
N2 C6 1.359(9) . ?
N3 C15 1.338(9) . ?
N3 C11 1.358(9) . ?
C1 C2 1.403(10) . ?
C2 C3 1.366(11) . ?
C3 C4 1.388(12) . ?
C4 C5 1.378(10) . ?
C5 C6 1.488(11) . ?
C6 C7 1.387(11) . ?
C7 C8 1.383(12) . ?
C8 C9 1.386(11) . ?
C9 C10 1.385(11) . ?
C10 C11 1.484(11) . ?
C11 C12 1.396(10) . ?
C12 C13 1.403(11) . ?
C13 C14 1.371(10) . ?
C14 C15 1.393(10) . ?
C16 C17 1.541(9) . ?
C17 C16 1.541(9) 2 ?
 
loop_
  _geom_angle_atom_site_label_1
  _geom_angle_atom_site_label_2
  _geom_angle_atom_site_label_3
  _geom_angle
  _geom_angle_site_symmetry_1
  _geom_angle_site_symmetry_3
  _geom_angle_publ_flag
O7 Mo1 O7 103.5(4) 2_655 . ?
O7 Mo1 O2 103.0(2) 2_655 2_655 ?
O7 Mo1 O2 98.3(2) . 2_655 ?
O7 Mo1 O2 98.3(2) 2_655 . ?
O7 Mo1 O2 103.0(2) . . ?
O2 Mo1 O2 145.2(3) 2_655 . ?
O7 Mo1 O6 88.3(2) 2_655 2_655 ?
O7 Mo1 O6 166.9(2) . 2_655 ?
O2 Mo1 O6 73.03(18) 2_655 2_655 ?
O2 Mo1 O6 80.55(18) . 2_655 ?
O7 Mo1 O6 166.9(2) 2_655 . ?
O7 Mo1 O6 88.3(2) . . ?
O2 Mo1 O6 80.55(18) 2_655 . ?
O2 Mo1 O6 73.03(18) . . ?
O6 Mo1 O6 80.7(2) 2_655 . ?
O3 Mo2 O1 104.5(2) . . ?
O3 Mo2 O2 96.8(2) . . ?
O1 Mo2 O2 100.0(2) . . ?
O3 Mo2 O4 96.6(2) . . ?
O1 Mo2 O4 99.0(2) . . ?
O2 Mo2 O4 153.19(19) . . ?
O3 Mo2 O5 98.0(2) . . ?
O1 Mo2 O5 156.5(2) . . ?
O2 Mo2 O5 83.63(19) . . ?
O4 Mo2 O5 71.54(18) . . ?
O3 Mo2 O6 164.59(19) . . ?
O1 Mo2 O6 88.53(19) . . ?
O2 Mo2 O6 72.51(18) . . ?
O4 Mo2 O6 89.28(17) . . ?
O5 Mo2 O6 70.26(16) . . ?
O10 Mo3 O8 102.1(2) . . ?
O10 Mo3 O9 106.0(2) . . ?
O8 Mo3 O9 96.67(18) . . ?
O10 Mo3 O4 96.2(2) . . ?
O8 Mo3 O4 98.6(2) . . ?
O9 Mo3 O4 149.6(2) . . ?
O10 Mo3 O11 88.7(2) . . ?
O8 Mo3 O11 169.2(2) . . ?
O9 Mo3 O11 81.08(17) . . ?
O4 Mo3 O11 78.97(18) . . ?
O10 Mo3 O5 164.3(2) . . ?
O8 Mo3 O5 85.9(2) . . ?
O9 Mo3 O5 86.3(2) . . ?
O4 Mo3 O5 68.90(18) . . ?
O11 Mo3 O5 83.44(17) . . ?
N2 Cu1 O4 162.8(2) . 7 ?
N2 Cu1 N1 80.5(3) . . ?
O4 Cu1 N1 95.8(2) 7 . ?
N2 Cu1 N3 79.8(2) . . ?
O4 Cu1 N3 101.4(2) 7 . ?
N1 Cu1 N3 159.6(3) . . ?
N2 Cu1 O1 96.1(2) . . ?
O4 Cu1 O1 100.90(19) 7 . ?
N1 Cu1 O1 93.9(2) . . ?
N3 Cu1 O1 93.6(2) . . ?
O11 P1 O6 110.8(3) 2_655 2_655 ?
O11 P1 O5 109.1(3) 2_655 . ?
O6 P1 O5 111.7(3) 2_655 . ?
O11 P1 C16 112.8(3) 2_655 . ?
O6 P1 C16 106.7(3) 2_655 . ?
O5 P1 C16 105.5(3) . . ?
Mo2 O1 Cu1 129.2(2) . . ?
Mo2 O2 Mo1 123.3(2) . . ?
Cu1 O4 Mo2 123.1(2) 7 . ?
Cu1 O4 Mo3 114.9(2) 7 . ?
Mo2 O4 Mo3 119.5(2) . . ?
P1 O5 Mo2 127.9(3) . . ?
P1 O5 Mo3 132.3(3) . . ?
Mo2 O5 Mo3 99.64(17) . . ?
P1 O6 Mo1 125.4(3) 2_655 . ?
P1 O6 Mo2 127.0(3) 2_655 . ?
Mo1 O6 Mo2 90.89(15) . . ?
Mo3 O9 Mo3 145.3(4) . 2_655 ?
P1 O11 Mo3 122.4(3) 2_655 . ?
C1 N1 C5 118.2(7) . . ?
C1 N1 Cu1 126.8(6) . . ?
C5 N1 Cu1 115.0(5) . . ?
C10 N2 C6 121.4(7) . . ?
C10 N2 Cu1 119.6(5) . . ?
C6 N2 Cu1 118.4(5) . . ?
C15 N3 C11 118.8(6) . . ?
C15 N3 Cu1 127.5(5) . . ?
C11 N3 Cu1 113.7(5) . . ?
N1 C1 C2 122.3(8) . . ?
C3 C2 C1 119.6(8) . . ?
C2 C3 C4 118.6(8) . . ?
C5 C4 C3 118.4(8) . . ?
N1 C5 C4 122.7(7) . . ?
N1 C5 C6 113.4(7) . . ?
C4 C5 C6 123.9(7) . . ?
N2 C6 C7 119.7(7) . . ?
N2 C6 C5 112.0(7) . . ?
C7 C6 C5 128.0(7) . . ?
C8 C7 C6 119.4(8) . . ?
C7 C8 C9 119.6(8) . . ?
C10 C9 C8 118.9(8) . . ?
N2 C10 C9 120.9(7) . . ?
N2 C10 C11 112.2(7) . . ?
C9 C10 C11 126.8(7) . . ?
N3 C11 C12 122.2(7) . . ?
N3 C11 C10 114.5(7) . . ?
C12 C11 C10 123.3(7) . . ?
C11 C12 C13 117.5(7) . . ?
C14 C13 C12 120.2(7) . . ?
C13 C14 C15 118.8(7) . . ?
N3 C15 C14 122.3(7) . . ?
C17 C16 P1 116.8(5) . . ?
C16 C17 C16 110.3(9) 2 . ?
 
_diffrn_measured_fraction_theta_max    0.978
_diffrn_reflns_theta_full              28.29
_diffrn_measured_fraction_theta_full   0.978
_refine_diff_density_max    1.043
_refine_diff_density_min   -1.288
_refine_diff_density_rms    0.258

#===END
